# Supplementary material for: Incidence of acute lower respiratory tract disease hospitalisations, including pneumonia, among adults in Bristol, UK, 2019, estimated using both a prospective and retrospective methodology
Source: PubMed Central journal article supplement (PMC9204403; doi:10.1136/bmjopen-2021-057464), 2022-06-15
Supplement: bmjopen-2021-057464.draft_revisions.pdf [file bmjopen-2021-057464.draft_revisions.pdf]

# BMJ Open

BMJ Open is committed to open peer review. As part of this commitment we make the peer review history of every article we publish publicly available.

When an article is published we post the peer reviewers' comments and the authors' responses online. We also post the versions of the paper that were used during peer review. These are the versions that the peer review comments apply to.

The versions of the paper that follow are the versions that were submitted during the peer review process. They are not the versions of record or the final published versions. They should not be cited or distributed as the published version of this manuscript.

BMJ Open is an open access journal and the full, final, typeset and author-corrected version of record of the manuscript is available on our site with no access controls, subscription charges or pay-per-view fees (<http://bmjopen.bmj.com>).

If you have any questions on BMJ Open's open peer review process please email [info.bmjopen@bmj.com](mailto:info.bmjopen@bmj.com)

# BMJ Open

## Incidence of Hospitalized Acute Lower Respiratory Tract Disease Including Pneumonia and Lower Respiratory Tract Infection in Bristol, England, 2019

|                               |                                                                                                                                                                                                                                                                                                                                                                                                                                                                                                                                                                                                                           |
|-------------------------------|---------------------------------------------------------------------------------------------------------------------------------------------------------------------------------------------------------------------------------------------------------------------------------------------------------------------------------------------------------------------------------------------------------------------------------------------------------------------------------------------------------------------------------------------------------------------------------------------------------------------------|
| Journal:                      | <i>BMJ Open</i>                                                                                                                                                                                                                                                                                                                                                                                                                                                                                                                                                                                                           |
| Manuscript ID                 | bmjopen-2021-057464                                                                                                                                                                                                                                                                                                                                                                                                                                                                                                                                                                                                       |
| Article Type:                 | Original research                                                                                                                                                                                                                                                                                                                                                                                                                                                                                                                                                                                                         |
| Date Submitted by the Author: | 18-Sep-2021                                                                                                                                                                                                                                                                                                                                                                                                                                                                                                                                                                                                               |
| Complete List of Authors:     | Hyams, Catherine; University of Bristol, Academic Respiratory Unit; University of Bristol, School of Population Health Sciences<br>Begier, Beth; Pfizer Inc<br>Garcia Gonzalez, Maria; University of Bristol; Southmead Hospital, Academic Respiratory Unit<br>Southern, Jo; Pfizer Ltd<br>Campling, James; Pfizer Ltd<br>Gray, Sharon; Pfizer Inc<br>Oliver, Jennifer; University of Bristol, Schools of Cellular and Molecular Medicine and Population Health Sciences<br>Gessner, Bradford; Pfizer Inc<br>Finn, Adam; University of Bristol, Schools of Cellular and Molecular Medicine and Population Health Sciences |
| Keywords:                     | Heart failure < CARDIOLOGY, Respiratory infections < THORACIC MEDICINE, Epidemiology < INFECTIOUS DISEASES                                                                                                                                                                                                                                                                                                                                                                                                                                                                                                                |
|                               |                                                                                                                                                                                                                                                                                                                                                                                                                                                                                                                                                                                                                           |

SCHOLARONE™  
Manuscripts

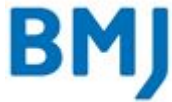

I, the Submitting Author has the right to grant and does grant on behalf of all authors of the Work (as defined in the below author licence), an exclusive licence and/or a non-exclusive licence for contributions from authors who are: i) UK Crown employees; ii) where BMJ has agreed a CC-BY licence shall apply, and/or iii) in accordance with the terms applicable for US Federal Government officers or employees acting as part of their official duties; on a worldwide, perpetual, irrevocable, royalty-free basis to BMJ Publishing Group Ltd ("BMJ") its licensees and where the relevant Journal is co-owned by BMJ to the co-owners of the Journal, to publish the Work in this journal and any other BMJ products and to exploit all rights, as set out in our [licence](#).

The Submitting Author accepts and understands that any supply made under these terms is made by BMJ to the Submitting Author unless you are acting as an employee on behalf of your employer or a postgraduate student of an affiliated institution which is paying any applicable article publishing charge ("APC") for Open Access articles. Where the Submitting Author wishes to make the Work available on an Open Access basis (and intends to pay the relevant APC), the terms of reuse of such Open Access shall be governed by a Creative Commons licence – details of these licences and which [Creative Commons](#) licence will apply to this Work are set out in our licence referred to above.

Other than as permitted in any relevant BMJ Author's Self Archiving Policies, I confirm this Work has not been accepted for publication elsewhere, is not being considered for publication elsewhere and does not duplicate material already published. I confirm all authors consent to publication of this Work and authorise the granting of this licence.

**Title:** Incidence of Hospitalized Acute Lower Respiratory Tract Disease Including Pneumonia and Lower Respiratory Tract Infection in Bristol, England, 2019

**Authors:** Catherine Hyams<sup>1,2,3</sup>, Elizabeth Begier<sup>4</sup>, Maria Garcia Gonzalez<sup>1,2</sup>, Jo Southern<sup>5</sup>, James Campling<sup>5</sup>, Sharon Gray<sup>4</sup>, Jennifer Oliver<sup>1</sup>, Bradford D. Gessner<sup>4</sup>, Adam Finn<sup>1</sup>

**Affiliations:**

<sup>1</sup> Bristol Vaccine Centre, Schools of Cellular and Molecular Medicine and Population Health Sciences, University of Bristol, Bristol, BS2 8AE, United Kingdom

<sup>2</sup> Academic Respiratory Unit, Learning and Research Building, Southmead Hospital, Bristol, UK, BS10 5NB

<sup>3</sup> Acute Medical Unit, Southmead Hospital, Bristol, UK, BS10 5NB

<sup>4</sup> Vaccines Medical Development, Scientific and Clinical Affairs, Pfizer Inc, Collegetown, PA, USA

<sup>5</sup> Vaccines Medical Affairs, Pfizer Ltd, Tadworth, UK, KT20 7NS

**Corresponding author:** Catherine Hyams, MBBS BSc(Hons) PhD  
Population Health Sciences, University of Bristol,  
Bristol, BS2 8AE,  
United Kingdom  
catherine.hyams@nbt.nhs.uk  
Catherine.hyams@bristol.ac.uk

**Alternate author:** Maria Garcia Gonzalez  
qa18884@bristol.ac.uk

**Running Title:** Incidence of acute lower respiratory tract disease in adults

**Keywords:** Pneumonia, respiratory infection, lower respiratory tract infection, heart failure

**Funding:** CH was funded by the National Institute for Health Research (NIHR) [NIHR Academic Clinical Fellowship (ACF-2015-25-002)]. The views expressed are those of the author(s) and not necessarily those of the NIHR or the Department of Health and Social Care. The remainder of the study funding was from Pfizer, Inc (W1255886-1).

1  
2  
3 **Competing Interests:** EB, JS, JC, SG, and BG are full time employees of Pfizer Vaccines and hold  
4  
5 stock or stock options. CH is Principal Investigator of the Avon CAP study  
6  
7 which is an investigator-led University of Bristol study funded by Pfizer and  
8  
9 has previously received support from the NIHR in an Academic Clinical  
10  
11 Fellowship. AF is a member of the Joint Committee on Vaccination and  
12  
13 Immunization (JCVI) and chair of the World Health Organization European  
14  
15 Technical Advisory Group of Experts on Immunization (ETAGE) committee. In  
16  
17 addition to receiving funding from Pfizer as Chief Investigator of this study,  
18  
19 he leads another project investigating transmission of respiratory bacteria in  
20  
21 families jointly funded by Pfizer and the Gates Foundation. The other  
22  
23 authors have no relevant conflicts of interest to declare.  
24  
25  
26  
27

28 **Word count:** 2997/4000  
29  
30  
31  
32

33 **Summary (38/40 words):** Using both retrospective and prospective methodologies, we found a high  
34  
35 annual incidence of acute lower respiratory disease (>1700 per 100000; 1.7%) in and around Bristol,  
36  
37 UK: pneumonia (~0.6%), lower respiratory tract infection without pneumonia (>0.7%), and heart  
38  
39 failure (>0.3%).  
40  
41

42 **Author Contributions:** CH, EB, MGG, JS, BDG and AF generated the research questions and analysis  
43  
44 plan CH, EB, MGG, JS, JC, SG and BDG undertook and contributed to the data  
45  
46 analysis. AF oversaw the research and data collection which was undertaken by  
47  
48 CH and MGG. All authors contributed to the preparation of the manuscript.  
49  
50  
51  
52  
53  
54  
55  
56  
57  
58  
59  
60

1  
2  
3 **1 Abstract (278/300):**

4  
5 **2 Objectives**

6  
7  
8 3 To determine the disease burden of aLRTD and its subsets (pneumonia, lower respiratory tract  
9 4 infection [LRTI], heart failure) in hospitalized adults in Bristol, UK.

10  
11  
12  
13 **5 Setting**

14  
15  
16 6 Single-centre, secondary care hospital, Bristol UK

17  
18  
19 **7 Design**

20  
21  
22 8 We estimated aLRTD hospitalizations incidence in adults ( $\geq 18$  years) in Bristol, UK using two  
23 9 approaches. First, retrospective ICD-10 code analysis (first five positions/hospitalization) identified  
24 10 aLRTD events over a 12-month period (March2018–Feb2019). Secondly, during a 21-day prospective  
25 11 review (19Aug–9Sept2019), aLRTD admissions were identified, categorized by diagnosis, and  
26 12 subsequently annualized. Hospital catchment denominators were calculated using linked general  
27 13 practice and hospitalization data, with each practice's denominator contribution calculated based on  
28 14 practice population and percent of the practices' hospitalizations admitted to the study hospital.

29  
30  
31  
32  
33  
34  
35  
36  
37  
38 **15 Participants**

39  
40  
41 16 Prospective review: 1322 adults screened; 410 identified with aLRTD. Retrospective review: 7727 adult  
42 17 admissions.

43  
44  
45  
46 **18 Primary and Secondary outcome measures**

47  
48  
49 19 The incidence of aLRTD and its subsets in the adult population of Southmead Hospital, Bristol UK.

50  
51  
52 **20 Results**

53  
54  
55 21 Based on ICD-10 code analysis, annual incidences per 100000 population were: aLRTD, 1901;  
56 22 pneumonia, 591; LRTI, 739; heart failure, 402. aLRTD incidence was highest among those  $\geq 65$ -years:  
57 23 65–74 (3684 per 100000 adults), 75–84 (6962 per 100000 adults), and  $\geq 85$  (11430 per 100000 adults).

24 During the prospective review, 410/1322 (31%) hospitalized adults had aLRTD signs/symptoms, and  
25 annualized incidences closely replicated retrospective analysis results.

## 26 **Conclusions**

27 aLRTD disease burden was high, increasing sharply with age. aLRTD incidence is probably higher than  
28 estimated previously due to criteria specifying respiratory-specific symptoms or radiological change,  
29 usage of only the first diagnosis code, and mismatch between case count sources and population  
30 denominators. This may have significant consequences for healthcare planning, including usage of  
31 current and future vaccinations against respiratory infection.

## 34 ***Strengths and Limitations of This Study***

- 35 • We used two analytical methods at the same site over a comparable period, to calculate  
36 incidence using both prospective and retrospective approaches.
- 37 • The case burden of aLRTD and its subgroups was pre-defined and included patients with  
38 atypical presentations
- 39 • We calculated incidence using a denominator derived from GP records, providing increased  
40 accuracy compared to population calculations based on census data.
- 41 • This was a single-center study, with a predominantly Caucasian cohort; therefore, the findings  
42 might not be generalizable to other populations.
- 43 • The ICD-10 coding data analysis was limited to codes within the first five positions, and  
44 therefore may have excluded some cases where other diagnoses were placed higher in the  
45 diagnostic coding hierarchy.

## 47 Introduction

48 Acute lower respiratory tract disease (aLRTD) encompasses pneumonia, lower respiratory tract  
49 infection (LRTI), acute bronchitis, exacerbation of underlying respiratory diseases, including asthma  
50 and chronic obstructive pulmonary disease (COPD), and acute heart failure (HF) events resulting in  
51 respiratory symptoms (e.g. breathlessness). Before the COVID-19 pandemic, European healthcare  
52 costs for pneumonia alone were estimated at €10 billion annually, including €5.7 billion for inpatient  
53 care. [1] Pneumonia incidence in Europe varies by country and intra-country region, age,  
54 socioeconomic status, and gender; [2-4, 7] however, in all studies pneumonia incidence increases  
55 sharply with age. [3] Pneumonia affects an estimated 0.5% to 1% of UK adults each year [5, 6]. Overall  
56 LRTI incidence is considerably higher with ~15% of UK adults aged ≥65 years experiencing an event  
57 each year. [7]

58  
59 However, aLRTD incidence may be considerably higher than previously reported, given that published  
60 literature has documented several reasons why previous estimates may have been erroneously low.  
61 Estimates of aLRTD based on pneumonia defined as radiologically demonstrated alveolar infiltrates,  
62 may underestimate true disease burden as chest radiography (CXR) is an imperfect gold-standard.  
63 Immunosuppressed, elderly or dehydrated patients are likely to be under-represented if respiratory  
64 infection is defined by radiologically demonstrated changes. [8, 9] Microbiological investigations for  
65 pneumonia are undertaken variably and identify a causative pathogen in 50% of cases at most [10,  
66 11]; hence, the disease is probably under-reported when confirmed microbiological diagnosis is  
67 required. Furthermore, Respiratory Syncytial Virus (RSV) infection has recently been recognized as an  
68 important respiratory pathogen later in life, [16] with severe disease occurring in patient groups in  
69 whom the diagnosis is likely to be under-recognized (e.g. the elderly or those with underlying cardiac  
70 conditions). [17] Studies of clinical coding data are retrospective and subject to recognized limitations  
71 associated with this methodology. [12, 13] Older patients with pneumonia often have atypical



1  
2  
3 72 presenting signs and symptoms, which may lead to missed or incorrect admission diagnoses. [14]  
4  
5 73 Pneumonia may occur secondary to, or be an underlying cause of, the main presenting complaint,  
6  
7 74 particularly in patients with cerebrovascular accidents (CVA), heart failure (HF), COPD exacerbations  
8  
9  
10 75 or altered consciousness levels. [15] In these scenarios, pneumonia may not be the primary  
11  
12 76 hospitalization diagnosis code and may not even be coded as an associated diagnosis.  
13  
14

15 77  
16  
17

18 78 Given the paucity of data supporting accurate aLRTD incidence rates and its disease subsets, we  
19  
20 79 undertook to assess aLRTD incidence by two approaches (retrospective and prospective) in Bristol,  
21  
22 80 UK, seeking to determine the disease burden of hospitalized aLRTD and its subgroups more accurately.  
23  
24

25 81  
26  
27

28 82  
29  
30  
31  
32  
33  
34  
35  
36  
37  
38  
39  
40  
41  
42  
43  
44  
45  
46  
47  
48  
49  
50  
51  
52  
53  
54  
55  
56  
57  
58  
59  
60

## 83 **Methods**

### 84 *Study Design*

85 This study was conducted at a large secondary care institution in UK (North Bristol NHS Trust) with  
86 specialist Respiratory Services (interstitial lung disease, pleural disease). Two approaches were  
87 undertaken to estimate aLRTD incidence: (1) “retrospective analysis” of aLRTD International  
88 Classification of Diseases Tenth Revision (ICD-10) diagnostic codes for an entire year; and, (2) 21-day  
89 observational “prospective review” of aLRTD hospital admissions.

### 90 *Ethics*

91 This study was approved by North Bristol NHS Trust Research Audit Ethics Committee (CA52218).

### 92 *Patient and Public Involvement*

93 No patient involved.

### 94 *Retrospective Analysis*

95 For the retrospective analysis, all adult inpatient admissions ( $\geq 18$  years) to the study hospital during  
96 March 2018–February 2019 with aLRTD ICD-10 diagnostic codes (Supplementary data 1) in any of the  
97 first 5 positions were identified and categorized into aLRTD subgroups: pneumonia, LRTI, other LRTD,  
98 and HF. A mutually exclusive hierarchy was used (pneumonia, LRTI, then other LRTD) although HF  
99 diagnoses could co-occur with other categories. “Other LRTD” included acute respiratory events that  
100 could not definitively be placed in another category.

### 101 *Prospective Review*

102 Adult patients ( $\geq 18$  years) resident within Bristol, North Somerset, and South Gloucestershire Clinical  
103 Commissioning Group (CCG) referred to the Acute Medical Unit (AMU) at North Bristol NHS Trust  
104 during 19<sup>th</sup> August –9<sup>th</sup> September 2019 were included. A respiratory physician (CH) reviewed  
105 presenting features and investigation results for each admitted patient to determine whether aLRTD

1  
2  
3 106 was present. Further medical record review was undertaken if patients had: new/worsening  
4  
5 107 breathlessness, cough or sputum production; new or worsening peripheral oedema; pleurisy; clinical  
6  
7 108 examination findings consistent with respiratory infection or HF; or fever attributable to suspected  
8  
9 109 respiratory infection. Patients with non-respiratory diagnoses were excluded.  
10  
11  
12

#### 13 110 *Prospective Review Outcome measures*

14  
15 111 aLRTD was considered confirmed in individuals with: new/worsening respiratory symptoms, with or  
16  
17 112 without fever; sepsis, delirium or raised inflammatory markers attributable to likely respiratory  
18  
19 113 infection in admitting clinical team's opinion; radiological change in keeping with infection (e.g.  
20  
21 114 consolidation); and/or final diagnosis of LRTI, pneumonia or infective exacerbation of a chronic  
22  
23 115 respiratory condition. A pneumonia diagnosis was assigned if radiological changes likely due to  
24  
25 116 infection were described by the reporting radiologist. A LRTI diagnosis was assigned if aLRTD signs and  
26  
27 117 symptoms likely to be due to infection were present without demonstrated radiological change. A HF  
28  
29 118 diagnosis was assigned in presence of: new/worsening breathlessness and bi-basal crepitations,  
30  
31 119 cardiac wheeze or new/worsening bilateral pitting oedema; elevated pro-NT BNP ( $\geq 450$ pg/mL);  
32  
33 120 radiologist-reported radiographic changes consistent with cardiac failure; or a final consultant  
34  
35 121 physician diagnosis of HF, cardiac failure or left-ventricular failure. When present,  $\geq 1$  diagnosis was  
36  
37 122 selected.  
38  
39  
40  
41  
42

43 123 For both retrospective and prospective studies, pneumonia included both community and healthcare  
44  
45 124 setting acquired cases; although, the prospective review only captured admitting diagnoses and  
46  
47 125 pneumonias occurring later during hospitalization were not included.  
48  
49

#### 50 126 *Incidence calculations*

51  
52  
53 127 Annual incidence per 100000 persons was calculated for both retrospective and prospective studies.  
54  
55 128 Case counts from prospective review were annualized (i.e., case counts by diagnosis and overall were  
56  
57  
58  
59  
60

1  
2  
3 129 divided by the percentage of annual admissions for these diagnosis groups that occurred in this 21-  
4  
5 130 day period in the retrospective analysis).

7  
8 131 *Incidence Denominators*

10  
11 132 To calculate appropriate population denominators for incidence calculations, aLRTD hospital  
12  
13 133 admission event data were linked to aggregated GP practice patient registration data within the NHS  
14  
15 134 Bristol, North Somerset, and South Gloucestershire CCG for 2017–2019. Only 4% of patients sought  
16  
17 135 care at North Bristol NHS Trust hospital from outside these local CCGs, despite presence of specialist  
18  
19 136 respiratory services. For GP practices within these same CCGs, the proportion of their aLRTD  
20  
21 137 admissions occurring at North Bristol NHS Trust was multiplied by their patient registration count in  
22  
23 138 2019 by age group, to get each practice's contribution to the denominator (e.g. if 50% aLRTD  
24  
25 139 admissions were at North Bristol among persons 50–64 years, the practice would contribute half of  
26  
27 140 their patients 50–64 years to the denominator). Further details of this methodology have been  
28  
29 141 described previously. [27]

30  
31  
32  
33  
34 142

35  
36  
37 143 *Statistical analysis*

38  
39  
40 144 Patient characteristics were tabulated by aLRTD diagnosis. Categorical variables were presented as  
41  
42 145 counts with percentages. Continuous data are presented with means and standard deviations (SD) if  
43  
44 146 normally distributed and medians and interquartile range (IQR) if not normally distributed. Patient  
45  
46 147 groups difference were evaluated using the Friedman test with Wilcoxon signed-rank test.

## 149 **Results**

150

### 151 *Retrospective analysis*

152 Over a 12-month period, we identified 7727 hospital admissions for aLRTD: 3005 LRTI admissions,  
153 2402 pneumonia, 1633 HF and 1071 other LRTD (Table 1). aLRTD admissions were lowest in March  
154 and April and highest December through February (Figure 1A), overall and for all aLRTD subgroups  
155 ( $P<0.05$ ) (Figure 1B-D). Overall, 28.1% (2244) cases were identified as being potentially hospital-  
156 acquired infection based on co-occurring ICD-10 code 'Y95 Nosocomial Infection'.

157

### 158 *Prospective review*

159 Among 1322 eligible adult patients referred to AMU over the 21-day review period (Figure 2), 410  
160 patients had signs or symptoms of aLRTD: 188 (46%) LRTI; 152 (37%) pneumonia, and 77 (19%) HF.  
161 Seven patients had both decompensated HF and a respiratory infection at hospital admission. On  
162 admission, >10% of aLRTD patients did not have respiratory symptoms: 16 (11%) pneumonia, 25 (13%)  
163 LRTI, and 18 (14%) HF (Table 2).

164 Almost all adults admitted with aLRTD underwent routine biochemistry, hematology, and radiological  
165 investigation (99.9%,  $n=409$ ). In contrast, only 150 (37%) patients with aLRTD had microbiological  
166 testing performed: blood cultures ( $n=149$ , 36%) and urine cultures ( $n=143$ , 35%). Pneumonia patients  
167 more commonly underwent microbiological investigation than LRTI patients ( $P<0.05$ ) with highest  
168 disparity in rates of sputum culture, urinary antigens, and respiratory viral PCR (Table 2). All cardiac  
169 failure patients who underwent microbiological investigation had concomitant respiratory infection  
170 (Table 2). Overall, a microbiological diagnosis was found in 11 (3%) cases, highlighting the low  
171 frequency of definitive pathogen identification in aLRTD. Younger patients underwent microbiological  
172 testing more frequently than the elderly for all aLRTD categories (Table 2).

173

1  
2  
3 174 *Disease incidence*  
4  
5

6 175 Retrospective analysis yielded an overall aLRTD incidence of 1901 per 100000. Disease incidence rose  
7  
8 176 with increasing age (Table 3), both overall and for all disease subgroups; incidences per 100000 among  
9  
10 177 adults aged  $\geq 85$  years were: 11430 (aLRTD), 6116 (LRTI), 4215 (pneumonia) and 4005 (HF). Overall,  
11  
12 178 28.1% aLRTD hospitalizations also included an ICD-10 discharge code for 'nosocomial infection',  
13  
14 179 suggesting the aLRTD event or other infection was hospital-acquired. For pneumonia 25.3% had the  
15  
16 180 nosocomial infection code. If all of these were related to the pneumonia diagnosis, an estimated  
17  
18 181 residual 1794 events would have been community-acquired pneumonia (annual incidence  
19  
20 182 441/100000 adults). Among older age categories, where the incidence of aLRTD was highest, LRTI  
21  
22 183 incidence was similar to pneumonia incidence, with an approximate 1:1 ratio of LRTI to pneumonia  
23  
24 184 cases. However, among adults under age 50 years, there were approximately twice as many LRTI cases  
25  
26 185 observed as pneumonia cases. Incidence calculations using annualized prospective review results  
27  
28 186 were broadly comparable with retrospective analysis of ICD-10 data (Table 3).  
29  
30  
31  
32  
33  
34  
35  
36  
37  
38  
39  
40  
41  
42  
43  
44  
45  
46  
47  
48  
49  
50  
51  
52  
53  
54  
55  
56  
57  
58  
59  
60

187

**Discussion:**

This is the first UK study to assess aLRTD incidence comprehensively. We conducted an analysis of 12-months of hospital admissions by ICD-10 diagnosis code data and a 21-day prospective review at a large academic hospital in southwest England. With both approaches, we found a high annual incidence of aLRTD (>1700 per 100000; 1.7%), pneumonia (~0.6%), LRTI without pneumonia (>0.7%), and HF (>0.4%). Incidences increased sharply in a non-linear manner as age increased above 65 years for all aLRTD categories. These results suggest rates are probably significantly higher than previous disease estimates from the UK (Table 4) but comparable with many results globally, [18,19] with important consequences for healthcare resources. For example, a recent review highlighted that pneumonia incidences ranged from 1000 to 2500 per 100000 (1–2.5%) among persons aged 65–74 years in Spain, Germany, France, Japan and the US, which are comparable to the >1250 per 100000 (1.3%) reported here. Some of the potential sources of underestimation for other UK incidence studies (Table 4) include: case source and denominator mismatch; use of first position in ICD-code analysis only; inclusion of enrolled subjects in consent-based prospective studies only; requiring specific symptoms and chest x-ray confirmation in order to be classified as pneumonia/aLRTD; and, lastly, the rising incidence of aLRTD.

204

*Comparison with published literature*

No studies have reported aLRTD incidence comprehensively in UK hospitalized patients within the last 20 years. However, eight publications report incidence of  $\geq 1$  aLRTD subgroup. Seven publications reported community-acquired pneumonia (CAP) incidence (three from Nottingham, UK). For pneumonia, our incidence estimates were three to four-fold higher than other UK inpatient incidence estimates (Table 4) but comparable to estimates from other countries. [18, 19] Only two UK studies from approximately 20 years ago reported LRTI incidence (one with both CAP and LRTIs; Table 4), and only one provided an inpatient estimate. [25] LRTI incidence was approximately 2-fold lower than that

1  
2  
3 213 calculated here, taking into account inclusion of CAP and other LRTI in their estimates. [25] The one  
4  
5 214 UK study reporting HF incidence had methodological differences (i.e., inclusion of outpatients and  
6  
7 215 limiting to initial HF diagnosis) and estimates could not be compared. [26] Close examination of the  
8  
9 216 existing literature methods yielded multiple sources for potential underestimation.

11  
12  
13 217 First, for incidence studies that were not countrywide, identifying an appropriate denominator is  
14  
15 218 challenging. Like many other inpatient settings worldwide, UK hospitals' catchment areas for acute  
16  
17 219 treatment are principally driven by geography, but the proportion of any area's residents expected to  
18  
19 220 use the hospital becomes less clear as distance from the hospital increases because catchment areas  
20  
21 221 and populations of different hospitals may overlap. Defining hospital catchment populations based  
22  
23 222 solely on census data cannot account for this variability. Including all geographic areas using the  
24  
25 223 hospital to any extent results in population denominator overestimation and underestimated  
26  
27 224 incidence. Here, we addressed this by calculating population denominators based on hospital  
28  
29 225 utilization behavior from referring General Practices.

30  
31  
32  
33 226 Second, other studies used fewer codes in their ICD code analysis: all limited their analyses to events  
34  
35 227 where the diagnostic code was in the first position (Table 4; case definition column), potentially  
36  
37 228 excluding admissions in which pneumonia/LRTI complicated other underlying respiratory diseases,  
38  
39 229 including COPD and asthma. Limiting to first position has been shown to reduce sensitivity for  
40  
41 230 pneumonia events by about 30% (66%–72% sensitive). [20, 21] Conversely, the recent British Thoracic  
42  
43 231 Society (BTS) audit on CAP found ~27% of pneumonia events identified by ICD code (J12-18) had no  
44  
45 232 new CXR infiltrates. [6] Even accounting for this potential over coding practice, our estimates remain  
46  
47 233 well above other published UK estimates.

48  
49  
50  
51  
52 234 Third, for other prospective studies, exclusion of events where patients did not consent to  
53  
54 235 participation or were not identified by study surveillance processes (often conducted predominately  
55  
56 236 during business hours) can introduce underestimation. Further, other prospective pneumonia studies  
57  
58 237 specifically required documentation of specific symptoms, radiological findings, and treatments, [22]  
59  
60



1  
2  
3 238 potentially excluding those without these features documented in medical records. In our prospective  
4  
5 239 review, approximately 11% did not display typical signs and symptoms of pneumonia and could have  
6  
7 240 been excluded by that requirement. Requiring CXR confirmation has been shown to reduce incidence  
8  
9 241 estimates for pneumonia, [19] although all pneumonia events in our prospective review were  
10  
11  
12 242 radiologically confirmed.

13  
14  
15 243 Fourth, trends over time may also contribute to our estimates being higher than previous reports. Our  
16  
17 244 study's estimates are recent, and rising incidence of pneumonia has been documented in all studies  
18  
19 245 that have reported such trends. [22-24]

20  
21  
22 246 Finally, this study included, in part, hospital-acquired pneumonias (HAP), which were excluded from  
23  
24 247 estimates calculated in some other studies (Table 4). The retrospective analysis may have included  
25  
26 248 more nosocomial infection than the prospective review, as the latter was focused on evaluation of  
27  
28 249 patients at admission for aLRTD and would not have reliably captured events that developed during  
29  
30  
31 250 hospitalization. 25.3% pneumonia events included a nosocomial infection code, but this code could  
32  
33 251 relate to any nosocomial infection during that hospitalization. If all these cases were assumed to be  
34  
35 252 hospital-acquired pneumonia, our estimates community-acquired pneumonia incidence would still be  
36  
37 253 well above prior UK estimates: 441/100000 ( $\geq 18$  years).

38  
39  
40  
41 254 While not impacting all-cause aLRTD incidence estimates discussed above, during the prospective  
42  
43 255 review, we found low rates of microbial investigation which prevented us from generating pathogen-  
44  
45 256 specific incidence estimates. Only 52% of patients with radiologically-confirmed pneumonia  
46  
47 257 underwent microbiological testing during hospitalization, with even lower rates in other aLRTD  
48  
49 258 subgroups (41% LRTI and 14% HF). Microbiological testing occurred less frequently as age increased,  
50  
51 259 particularly in LRTI patients. It is possible that, because aLRTD hospitalizations are substantially more  
52  
53 260 common among older persons, less etiologic investigation is performed. Furthermore, clinicians may  
54  
55 261 elect to treat elderly patients with a more pragmatic and less invasive approach. Management  
56  
57 262 guidelines do not require specific pathogen identification to inform treatment choice. Presence only  
58  
59  
60

1  
2  
3 263 of atypical features on presentation (in this series, 13% LRTI and 11% pneumonia cases) may also  
4  
5 264 reduce the likelihood of timely microbiological testing. Low rates of microbiological testing, and  
6  
7 265 consequently of confirmed microbiological diagnosis, may represent a source of underestimation of  
8  
9 266 pathogen-specific disease incidence in patient groups (i.e., testing bias), particularly in elderly patient  
10  
11 267 groups.  
12  
13  
14  
15 268

### 17 18 269 *Strengths and Limitations of This Study*

19  
20  
21 270 This study has many strengths. First, this study used two analytical methods at the same site over a  
22  
23 271 comparable period, to calculate incidence using both prospective and retrospective approaches.  
24  
25 272 Second, the case burden of aLRTD and its subgroups was pre-defined and included patients with  
26  
27 273 atypical presentations but with clinical and/or radiological diagnoses, who may otherwise have been  
28  
29 274 excluded from analysis. Additionally, we calculated incidence using a denominator derived from GP  
30  
31 275 records, providing increased accuracy compared to population calculations based on census data.  
32  
33  
34

35 276 However, the study also had some limitations. This was a single-center study, with a predominantly  
36  
37 277 Caucasian cohort; therefore, the findings might not be generalizable to other populations. The ICD-10  
38  
39 278 coding data analysis was limited to codes within the first five positions, and therefore may have  
40  
41 279 excluded some cases where other diagnoses were placed higher in the diagnostic coding hierarchy.  
42  
43 280 Furthermore, we could not determine how many cases of the 28.1% ICD-10 cases also coded with  
44  
45 281 nosocomial infection had hospital-acquired respiratory infection rather than other nosocomial  
46  
47 282 infections.  
48  
49  
50

51 283 Although the denominator used to calculate incidence was derived from GP records, this was still an  
52  
53 284 estimate as there is no precisely defined denominator hospital catchment. We were unable to exclude  
54  
55 285 patients from outside the local CCGs in the retrospective analysis, due to the way ICD-10 data was  
56  
57 286 obtained. However, these patients were excluded from the prospective review and the incidence  
58  
59  
60

1  
2  
3 287 calculated was comparable, suggesting any effect that patients attending North Bristol NHS Trust from  
4  
5 288 outside the local CCGs have on incidence estimates is minimal. This may be because any effect of  
6  
7 289 travelling or health-seeking behavior is bi-directional: whilst some patients admitted to Southmead  
8  
9 290 hospital were from outside the local area, it is also true that patients with aLRTD within the relevant  
10  
11 291 CCGs would have been admitted to other hospitals. We also acknowledge the 21-day prospective  
12  
13 292 review period was relatively short, not repeated and may not be fully representative of clinical practice  
14  
15 293 and cases throughout the year.  
16  
17  
18  
19  
20  
21  
22  
23  
24  
25  
26  
27  
28  
29  
30  
31  
32  
33  
34  
35  
36  
37  
38  
39  
40  
41  
42  
43  
44  
45  
46  
47  
48  
49  
50  
51  
52  
53  
54  
55  
56  
57  
58  
59  
60

294  
295 In conclusion, we found similarly high estimates of LRTD incidence using two different approaches.  
296 Combining all types of LRTD highlights the high burden for this important and potentially life-  
297 threatening disease group. Incidence assessments require close assessments of potential areas of  
298 under ascertainment, including unidentified or unenrolled cases in prospective studies, reduced  
299 positions or number of ICD-10 codes included for retrospective studies, and population denominator  
300 mismatch for all study types. Our prospective review findings highlight the need to consider atypical  
301 clinical presentations for pneumonia and the lack of routine microbiological investigation in many  
302 aLRTD patients required for pathogen-specific aLRTD incidence calculation. Future research should  
303 include a fully prospective assessment of aLRTD incidence with comprehensive diagnostic testing  
304 across multiple respiratory seasons, to ensure accurate capture of all aLRTD events, particularly in the  
305 elderly. Such research should be undertaken given the high and rising aLRTD burden to enable  
306 appropriate healthcare planning and identification of interventions which may reduce disease burden.  
307

1  
2  
3 308 **Acknowledgements**  
4

5 309 We would like to acknowledge the assistance of Qi Yan, PhD (Pfizer, Inc.) who provided  
6  
7 310 indispensable medical writing and literature review support for this manuscript and Harvey Walsh  
8  
9 311 Health who performed the hospital denominator calculation used here. For the denominator  
10  
11 312 analysis, Hospital Episode Statistics (HES) Data were re-used with the permission of NHS Digital via  
12  
13 313 Harvey Walsh Limited.  
14  
15

16 314

17  
18 315 **Data Sharing**  
19

20 316 No additional data available  
21  
22  
23  
24  
25  
26  
27  
28  
29  
30  
31  
32  
33  
34  
35  
36  
37  
38  
39  
40  
41  
42  
43  
44  
45  
46  
47  
48  
49  
50  
51  
52  
53  
54  
55  
56  
57  
58  
59  
60

For peer review only

317 **References**

- 318 1. Gibson GJ, Loddenkemper R, Lundback B, Sibille Y. Respiratory health and disease in Europe:  
319 the new European Lung White Book. *Eur Respir J* 2013; 42(3): 559-63.
- 320 2. Cilloniz C, Polverino E, Ewig S, et al. Impact of age and comorbidity on cause and outcome in  
321 community-acquired pneumonia. *Chest* **2013**; 144(3): 999-1007.
- 322 3. Torres A, Cilloniz C, Blasi F, et al. Burden of pneumococcal community-acquired pneumonia in  
323 adults across Europe: A literature review. *Respir Med* **2018**; 137: 6-13.
- 324 4. European Lung White Book. Pneumonia. Available at:  
325 [https://www.erswhitebook.org/chapters/acute-lower-respiratory-](https://www.erswhitebook.org/chapters/acute-lower-respiratory-infections/pneumonia/#:~:text=pneumonia%20(VAP).-,Incidence,000%20cases%20are%20expected%20annually)  
326 [infections/pneumonia/#:~:text=pneumonia%20\(VAP\).-](https://www.erswhitebook.org/chapters/acute-lower-respiratory-infections/pneumonia/#:~:text=pneumonia%20(VAP).-,Incidence,000%20cases%20are%20expected%20annually)  
327 [,Incidence,000%20cases%20are%20expected%20annually](https://www.erswhitebook.org/chapters/acute-lower-respiratory-infections/pneumonia/#:~:text=pneumonia%20(VAP).-,Incidence,000%20cases%20are%20expected%20annually). Accessed April 25, 2021.
- 328 5. British Lung Foundation. Pneumonia Statistics. Available at:  
329 <https://statistics.blf.org.uk/pneumonia>. Accessed April 25, 2021.
- 330 6. Lim W, Lawrence H. British Thoracic Society. National Audit Report: Adult Community  
331 Acquired Pneumonia Audit 2018-2019. National Audit Period: 1 December 2018 – 31 January  
332 2019, **2019**.
- 333 7. Millett ER, Quint JK, Smeeth L, et al. Incidence of community-acquired lower respiratory tract  
334 infections and pneumonia among older adults in the United Kingdom: a population-based  
335 study. *PLoS One* **2013**; 8(9): e75131.
- 336 8. Maughan BC, Asselin N, Carey JL, et al. False-negative chest radiographs in emergency  
337 department diagnosis of pneumonia. *R I Med J* (2013) **2014**; 97(8): 20-3.
- 338 9. Self WH, Courtney DM, McNaughton CD, et al. High discordance of chest x-ray and computed  
339 tomography for detection of pulmonary opacities in ED patients: implications for diagnosing  
340 pneumonia. *Am J Emerg Med* **2013**; 31(2): 401-5.
- 341 10. Cilloniz C, Ewig S, Polverino E, et al. Microbial aetiology of community-acquired pneumonia  
342 and its relation to severity. *Thorax* **2011**; 66(4): 340-6.
- 343 11. Jain S, Self WH, Wunderink RG, Team CES. Community-Acquired Pneumonia Requiring  
344 Hospitalization. *N Engl J Med* **2015**; 373(24): 2382.
- 345 12. Mainor AJ, Morden NE, Smith J, et al. ICD-10 Coding Will Challenge Researchers: Caution and  
346 Collaboration may Reduce Measurement Error and Improve Comparability Over Time. *Med  
347 Care* **2019**; 57(7): e42-e6.
- 348 13. Burns EM, Rigby E, Mamidanna R, et al. Systematic review of discharge coding accuracy. *J  
349 Public Health (Oxf)* **2012**; 34(1): 138-48.

- 1  
2  
3 350 14. Henig O, Kaye KS. Bacterial Pneumonia in Older Adults. *Infect Dis Clin North Am* **2017**; 31(4):  
4 351 689-713.  
5  
6 352 15. Fine MJ, Smith MA, Carson CA, et al. Prognosis and outcomes of patients with community-  
7 353 acquired pneumonia. A meta-analysis. *JAMA* **1996**; 275(2): 134-41.  
8  
9 354 16. Falsey AR, Walsh EE. Respiratory syncytial virus infection in elderly adults. *Drugs Aging* **2005**;  
10 355 22(7): 577-87.  
11  
12 356 17. Branche AR, Falsey AR. Respiratory syncytial virus infection in older adults: an under-  
13 357 recognized problem. *Drugs Aging* **2015**; 32(4): 261-9.  
14  
15 358 18. Chalmers J, Campling J, Ellsbury G, Hawkey PM, Madhava H, Slack M. Community-acquired  
16 359 pneumonia in the United Kingdom: a call to action. *Pneumonia (Nathan)* **2017**; 9: 15.  
17  
18 360 19. Shi T, Denouel A, Tietjen AK, et al. Global and Regional Burden of Hospital Admissions for  
19 361 Pneumonia in Older Adults: A Systematic Review and Meta-Analysis. *J Infect Dis* **2020**;  
20 362 222(Suppl 7): S570-S6.  
21  
22 363 20. van de Garde EM, Oosterheert JJ, Bonten M, et al. International classification of diseases codes  
23 364 showed modest sensitivity for detecting community-acquired pneumonia. *J Clin Epidemiol*  
24 365 **2007**; 60(8): 834-8.  
25  
26 366 21. Yu O, Nelson JC, Bounds L, Jackson LA. Classification algorithms to improve the accuracy of  
27 367 identifying patients hospitalized with community-acquired pneumonia using administrative  
28 368 data. *Epidemiology and infection* **2011**; 139(9): 1296-306.  
29  
30 369 22. Pick H, Daniel P, Rodrigo C, et al. Pneumococcal serotype trends, surveillance and risk factors  
31 370 in UK adult pneumonia, 2013-18. *Thorax* **2020**; 75(1): 38-49.  
32  
33 371 23. Elston JW, Santaniello-Newton A, Meigh JA, et al. Increasing incidence of invasive  
34 372 pneumococcal disease and pneumonia despite improved vaccination uptake: surveillance in  
35 373 Hull and East Yorkshire, UK, 2002-2009. *Epidemiology and infection* **2012**; 140(7): 1252-66.  
36  
37 374 24. Thorryington D, Andrews N, Stowe J, Miller E, van Hoek AJ. Elucidating the impact of the  
38 375 pneumococcal conjugate vaccine programme on pneumonia, sepsis and otitis media hospital  
39 376 admissions in England using a composite control. *BMC medicine* **2018**; 16(1): 13.  
40  
41 377 25. Lovering AM, MacGowan AP, Anderson P, Irwin D. Epidemiology and resource utilization for  
42 378 patients hospitalized for lower respiratory tract infection. *Clin Microbiol Infect* **2001**; 7(12):  
43 379 666-70.  
44  
45 380 26. Uijl A, Koudstaal S, Direk K, et al. Risk factors for incident heart failure in age- and sex-specific  
46 381 strata: a population-based cohort using linked electronic health records. *European journal of*  
47 382 *heart failure* **2019**; 21(10): 1197-206.  
48  
49  
50  
51  
52  
53  
54  
55  
56  
57  
58  
59  
60

1  
2  
3  
4  
5  
6  
7  
8  
9  
10  
11  
12  
13  
14  
15  
16  
17  
18  
19  
20  
21  
22  
23  
24  
25  
26  
27  
28  
29  
30  
31  
32  
33  
34  
35  
36  
37  
38  
39  
40  
41  
42  
43  
44  
45  
46  
47  
48  
49  
50  
51  
52  
53  
54  
55  
56  
57  
58  
59  
60

383 27. Campling J, Begier E, Vyse A, et al. A novel approach to calculate the local population  
384 denominator to calculate disease incidence for hospital admission related health events in  
385 England. Abstract for: Public Health Science: A National Conference Dedicated to New  
386 Research in UK Public Health. 26 November, 2021.

387

388

For peer review only

Table 1: Demographic Characteristics of Patients admitted with aLRTD for 1 Year ICD-10 code Retrospective Analysis and 21-day Prospective Review Period -  
- 2018–2019

| Characteristic  | Pneumonia          |                        | LRTI               |                        | Heart Failure      |                        | Other LRTD                | All LRTD           |                        |
|-----------------|--------------------|------------------------|--------------------|------------------------|--------------------|------------------------|---------------------------|--------------------|------------------------|
|                 | Prospective review | Retrospective analysis | Prospective review | Retrospective analysis | Prospective review | Retrospective analysis | Retrospective Review Only | Prospective review | Retrospective analysis |
| N               | 152                | 2402                   | 188                | 3005                   | 77                 | 1633                   | 1071                      | 410                | 7727                   |
| Gender, females | 61 (40)            | 1078 (45)              | 99 (53)            | 1482 (49)              | 39 (51)            | 731 (45)               | 489 (46)                  | 194 (47)           | 3780 (49)              |
| <b>Age</b>      |                    |                        |                    |                        |                    |                        |                           |                    |                        |
| Median (IQR), y | 80 (67-86)         | 81 (66-88)             | 70 (46-87)         | 69 (45-87)             | 87 (72-90)         | 87 (70-90)             | 74 (53-82)                | 80 (64-88)         | 81 (65-90)             |
| 18-24           | 4 (3)              | 72 (3)                 | 9 (5)              | 151 (5)                | 0 (0)              | 0 (0)                  | 26 (2)                    | 13 (3)             | 249 (3)                |
| 25-34           | 2 (2)              | 48 (2)                 | 12 (6)             | 183 (6)                | 0 (0)              | 3 (0)                  | 33 (3)                    | 14 (3)             | 267 (3)                |
| 35-44           | 6 (4)              | 97 (4)                 | 14 (7)             | 209 (7)                | 2 (3)              | 10 (1)                 | 59 (6)                    | 22 (5)             | 375 (5)                |
| 45-54           | 8 (5)              | 118 (5)                | 11 (6)             | 183 (6)                | 0 (0)              | 22 (1)                 | 112 (10)                  | 19 (5)             | 435 (6)                |
| 55-64           | 18 (12)            | 293 (12)               | 19 (10)            | 305 (10)               | 8 (10)             | 158 (10)               | 210 (20)                  | 45 (11)            | 966 (13)               |
| 65-74           | 34 (22)            | 501 (21)               | 32 (17)            | 549 (18)               | 10 (15)            | 199 (12)               | 223 (21)                  | 75 (18)            | 1472 (19)              |
| 75-84           | 44 (28)            | 667 (28)               | 40 (21)            | 621 (21)               | 20 (30)            | 498 (31)               | 205 (19)                  | 100 (24)           | 1991 (26)              |
| ≥85             | 38 (26)            | 606 (25)               | 51 (27)            | 704 (23)               | 37 (55)            | 742 (45)               | 203 (19)                  | 123 (30)           | 2255 (29)              |



**Table 2. Clinical Characteristics and Investigations of Patients admitted with aLRTD over 21-day Prospective Review Period in August-September 2020**

| Characteristic                                    | Pneumonia<br>n=152 (%) | LRTI<br>n=188 (%) | Heart Failure<br>n=77 (%) | All LRTD<br>n=410 (%) |
|---------------------------------------------------|------------------------|-------------------|---------------------------|-----------------------|
| GP                                                | 56 (37)                | 72 (39)           | 30 (39)                   | 158 (39)              |
| A&E department                                    | 93 (61)                | 100 (54)          | 45 (58)                   | 238 (58)              |
| Transfer from another unit                        | 2 (1)                  | 13 (7)            | 0 (0)                     | 15 (4)                |
| Other                                             | 1 (1)                  | 1 (1)             | 2 (3)                     | 4 (1)                 |
| <b>Referral Source</b>                            |                        |                   |                           |                       |
| Typical features†                                 | 136 (89)               | 163 (87)          | 63 (82)                   | 355 (87)              |
| Atypical features                                 | 16 (11)                | 25 (13)           | 14 (18)                   | 55 (13)               |
| - collapse/falls                                  | 11 (7)                 | 12 (6)            | 0 (0)                     | 23 (6)                |
| - confusion                                       | 0 (0)                  | 7 (4)             | 4 (5)                     | 10 (2)                |
| - drowsiness                                      | 1 (1)                  | 1 (1)             | 2 (3)                     | 4 (1)                 |
| - off legs/generally unwell                       | 5 (3)                  | 5 (3)             | 8 (10)                    | 18 (4)                |
| <b>LRTD Signs and symptoms on referral to AMU</b> |                        |                   |                           |                       |
| Biochemistry                                      | 152 (100)              | 185 (99)          | 77 (100)                  | 419 (100)             |
| Haematology                                       | 152 (100)              | 185 (99)          | 77 (100)                  | 419 (100)             |
| Radiology                                         | 152 (100)              | 185 (99)          | 77 (100)                  | 419 (100)             |
| <b>Investigations Performed</b>                   |                        |                   |                           |                       |
| <i>Testing by Age Group</i>                       |                        |                   |                           |                       |
| All patients                                      | 79/152 (52)*           | 77/188 (41)       | 11/77 (14)                | 167 (41)              |
| 18-24                                             | 3/4 (75)               | 6/9 (66)          | 0/0 (0)                   | 9/13 (69)             |
| 25-34                                             | 0/0 (0)                | 6/12 (50)         | 0/0 (0)                   | 6/12 (50)             |
| 35-44                                             | 5/6 (83)               | 10/14 (71)        | 2/2 (100)                 | 17/22 (77)            |
| 45-54                                             | 6/8 (75)               | 6/11 (55)         | 0/0 (0)                   | 13/19 (68)            |
| 55-64                                             | 11/18 (61)             | 12/19 (63)        | 5/8 (63)                  | 31/45 (69)            |
| 65-74                                             | 15/34 (44)             | 12/32 (38)        | 1/10 (10)                 | 28/75 (37)            |
| 75-84                                             | 21/43 (49)             | 10/40 (25)        | 2/20 (10)                 | 33/100 (33)           |
| ≥85                                               | 18/39 (46)             | 15/51 (19)        | 1/37 (3)                  | 34/124 (27)           |
| <b>Test performed</b>                             |                        |                   |                           |                       |
| Blood culture                                     | 79 (52)                | 70 (37)           | 5 (6)                     | 150 (37)              |
| Urine culture                                     | 66 (43)                | 77 (41)           | 11 (14)                   | 150 (37)              |
| Sputum culture                                    | 27 (18)*               | 7 (4)             | 2 (3)                     | 35 (9)                |
| BinaxNOW® Pn UAT ‡                                | 29 (19)*               | 6 (3)             | 0 (0)                     | 35 (9)                |
| Respiratory virus PCR                             | 16 (11)*               | 11 (6)            | 1 (1)                     | 28 (7)                |
| Pleural fluid culture                             | 3 (2)                  | 0 (0)             | 1 (1)                     | 4 (1)                 |

A&E, Accident and Emergency department; GP, general practitioner; LRTD, lower respiratory tract disease; LRTI, lower respiratory tract infection; IQR, interquartile range; Pn UAT, pneumococcal urinary antigen test; PCR, polymerase chain reaction.

\*  $P < 0.05$ .

† Typical symptoms included cough, breathlessness, increased or discolored sputum production, wheeze, pleurisy, peripheral oedema, haemoptysis, reduced exercise tolerance and/or fever.

‡ BinaxNOW Pn UAT was only performed in accordance with NICE/BTS guidelines.

**Table 3: Incidence of aLRTD resulting in hospital admission based on prospective and retrospective approaches by age group and condition, North Bristol National Health Service Trust— United Kingdom 2018–2019.**

|                                                        | Age Groups |            |            |            |            |            |
|--------------------------------------------------------|------------|------------|------------|------------|------------|------------|
|                                                        | All Adults | 18-49 y    | 50-64 y    | 65-74 y    | 75-84 y    | ≥85 y      |
| <b>Population in 2018</b>                              | 406481     | 226920     | 91534      | 45705      | 29487      | 12835      |
| <b>Retrospective Analysis of a Year's ICD-10 codes</b> |            |            |            |            |            |            |
| <b>Annual cases – N (row %)</b>                        |            |            |            |            |            |            |
| All aLRTD                                              | 7,727      | 1,130 (14) | 1,103 (14) | 1,684 (22) | 2,053 (27) | 1,757 (23) |
| Pneumonia                                              | 2,402      | 264 (11)   | 288 (12)   | 589 (25)   | 720 (30)   | 541 (22)   |
| LRTI                                                   | 3,005      | 576 (19)   | 410 (14)   | 572 (19)   | 662 (22)   | 785 (26)   |
| Other LRTD                                             | 1,071      | 246 (23)   | 268 (25)   | 226 (21)   | 200 (19)   | 131 (12)   |
| Heart Failure                                          | 1,633      | 48 (3)     | 189 (12)   | 397 (24)   | 485 (30)   | 514 (31)   |
| <b>LRTI/Pneumonia Ratio</b>                            | 1.3        | 2.2        | 1.4        | 1.0        | 0.9        | 1.5        |
| <b>Incidence (per 100,000)</b>                         |            |            |            |            |            |            |
| All aLRTD                                              | 1,901      | 497        | 1,205      | 3,684      | 6,962      | 13,689     |
| Pneumonia                                              | 591        | 116        | 315        | 1,289      | 2,442      | 4,215      |
| LRTI                                                   | 739        | 254        | 448        | 1,252      | 2,245      | 6,116      |
| Other LRTD                                             | 263        | 108        | 293        | 494        | 678        | 1,021      |
| Heart Failure                                          | 402        | 21         | 206        | 869        | 1,645      | 4,005      |
| <b>21-day Prospective Review (annualized)</b>          |            |            |            |            |            |            |
| <b>Annualized cases – N (row %)</b>                    |            |            |            |            |            |            |
| All aLRTD                                              | 7,885      | 1,038      | 962        | 1,692      | 2,231      | 1,962      |
| Pneumonia                                              | 2,621      | 224        | 397        | 776        | 690        | 534        |
| LRTI                                                   | 3,857      | 796        | 531        | 653        | 1,061      | 816        |
| Heart Failure                                          | 2,000      | 51         | 205        | 308        | 641        | 795        |
| <b>LRTI/Pneumonia Ratio</b>                            | 1.5        | 3.6        | 1.3        | 0.8        | 1.5        | 1.5        |
| <b>Incidence (per 100,000)</b>                         |            |            |            |            |            |            |
| All aLRTD                                              | 1,940      | 458        | 1,050      | 3,703      | 7,565      | 15,283     |
| Pneumonia                                              | 645        | 99         | 433        | 1,698      | 2,339      | 4,164      |
| LRTI                                                   | 944        | 351        | 580        | 1,429      | 3,599      | 6,360      |
| Heart Failure                                          | 492        | 23         | 224        | 673        | 2,174      | 6,193      |

LRTI = lower respiratory tract infection; LRTD = lower respiratory tract disease.

Pneumonia category includes community and healthcare acquired. For retrospective ICD-10 based cohort, the following mutually exclusive hierarchy was used to define pneumonia, LRTI, and other LRTD; heart failure event could overlap with other categories. "Other LRTD" contains LRTD events that could not definitively be placed in one of the other respiratory disease categories.

1  
2  
3 **Figure Legends:**  
4

5 **Figure 1: aLRTD admissions identified by Retrospective ICD-10 diagnostic code analysis at North**  
6  
7 **Bristol National Health Service Trust— United Kingdom 2018–2019.**  
8

9  
10 Monthly number of patients admitted, based on ICD-10 coding analysis, with (A) all acute Lower  
11  
12 Respiratory Tract Disease (aLRTD) (black bars), (B) Pneumonia (slashed bars), (C) Lower Respiratory  
13  
14 Tract Infection (LRTI) (white bars), (D) Other LRTD (cross-hash bars), and (E) Heart Failure (grey bars).  
15  
16

17  
18  
19 **Figure 2: Flow diagram of the Prospective Review**  
20  
21  
22  
23  
24  
25  
26  
27  
28  
29  
30  
31  
32  
33  
34  
35  
36  
37  
38  
39  
40  
41  
42  
43  
44  
45  
46  
47  
48  
49  
50  
51  
52  
53  
54  
55  
56  
57  
58  
59  
60

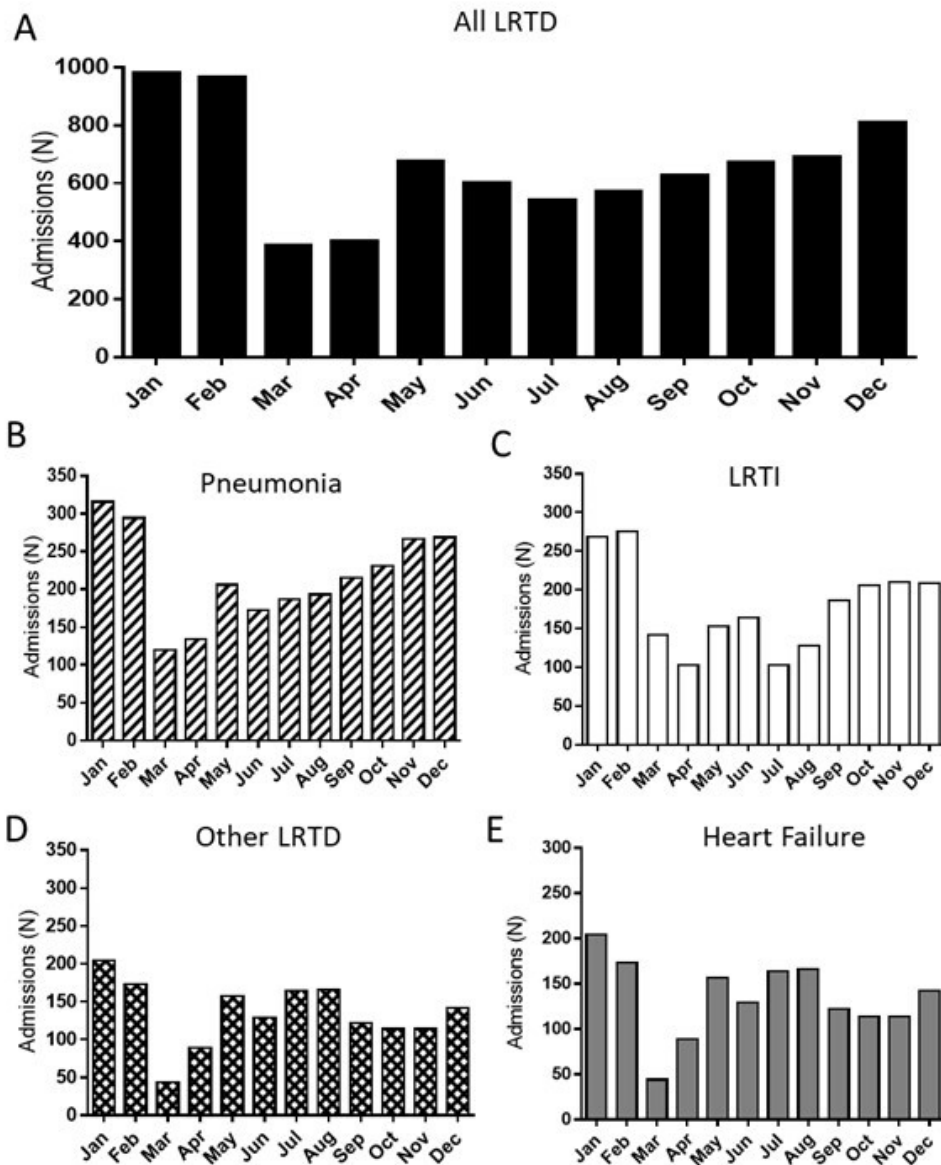

Figure 1: aLRTD admissions identified by Retrospective ICD-10 diagnostic code analysis at North Bristol National Health Service Trust— United Kingdom 2018–2019. Monthly number of patients admitted, based on ICD-10 coding analysis, with (A) all acute Lower Respiratory Tract Disease (aLRTD) (black bars), (B) Pneumonia (slashed bars), (C) Lower Respiratory Tract Infection (LRTI) (white bars), (D) Other LRTD (cross-hash bars), and (E) Heart Failure (grey bars).

49x60mm (300 x 300 DPI)

1  
2  
3  
4  
5  
6  
7  
8  
9  
10  
11  
12  
13  
14  
15  
16  
17  
18  
19  
20  
21  
22  
23  
24  
25  
26  
27  
28  
29  
30  
31  
32  
33  
34  
35  
36  
37  
38  
39  
40  
41  
42  
43  
44  
45  
46  
47  
48  
49  
50  
51  
52  
53  
54  
55  
56  
57  
58  
59  
60

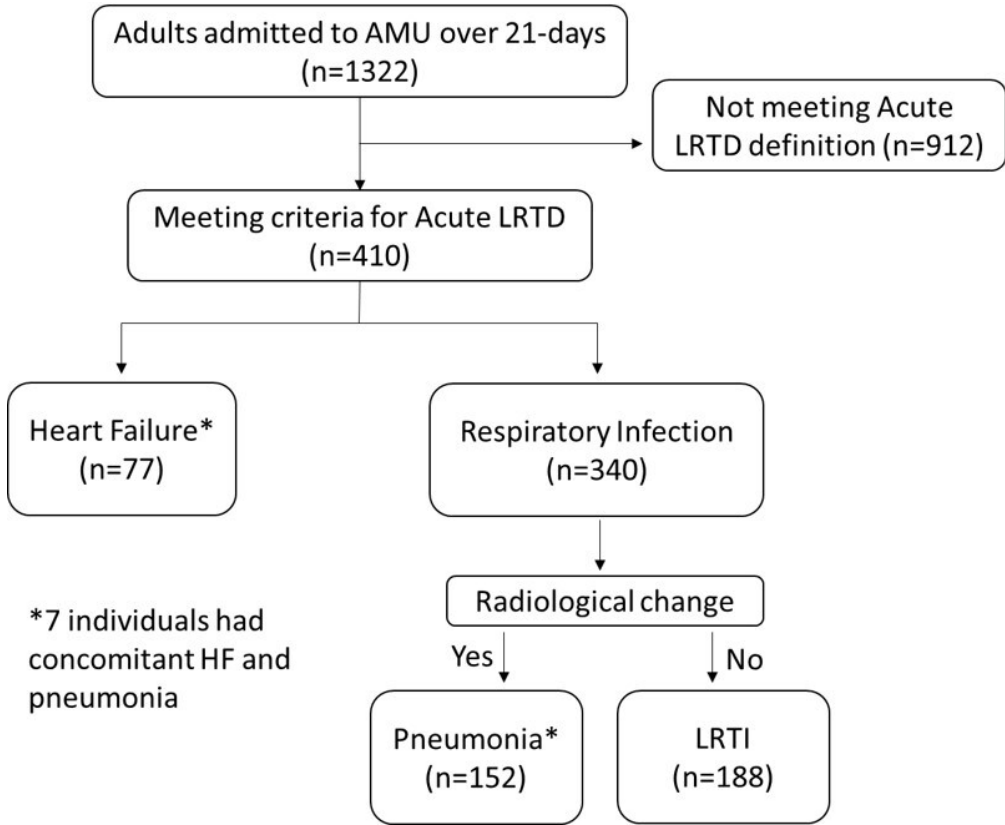

Figure 2: Flow diagram of the Prospective Review

67x55mm (300 x 300 DPI)

**Table 4: Literature review of aLRTD incidence in hospitalized adults, United Kingdom**

| Study                                | Study Years                    | Location (Facility)                            | Event Setting                   | Age   | Case Definition <sup>b</sup>                                                                                                                                                                                                                                                                                                                                                                            | Key inclusion                              | Denominator Source                                                                                                                                                                       | Overall Incidence       | Age Breakdown (years)                                           | Incidence per 100,000 by age <sup>d</sup>                | Comments                                                                                                                                                                                        |
|--------------------------------------|--------------------------------|------------------------------------------------|---------------------------------|-------|---------------------------------------------------------------------------------------------------------------------------------------------------------------------------------------------------------------------------------------------------------------------------------------------------------------------------------------------------------------------------------------------------------|--------------------------------------------|------------------------------------------------------------------------------------------------------------------------------------------------------------------------------------------|-------------------------|-----------------------------------------------------------------|----------------------------------------------------------|-------------------------------------------------------------------------------------------------------------------------------------------------------------------------------------------------|
| <b>Community –acquired Pneumonia</b> |                                |                                                |                                 |       |                                                                                                                                                                                                                                                                                                                                                                                                         |                                            |                                                                                                                                                                                          |                         |                                                                 |                                                          |                                                                                                                                                                                                 |
| Current Study                        | 2018 – 2019                    | Bristol (Southmead Hospital)                   | Inpatients only                 | ≥18 y | Clinical signs/symptoms with radiological change in keeping with infection (prospective review portion) <b>AND</b> Retrospective ICD-10 code analysis (1 <sup>st</sup> 5 positions): J12-J18, J85, and J86                                                                                                                                                                                              | Hospital-acquired pneumonia (HAP) included | Based on number of persons ≥18 years registered in referring GP practices. For practices with split referral patterns, number adjusted for percent of admissions that came to Southmead. | 648<br><br>591          | 18 –49<br>50 –64<br>65 –74<br>75 –84<br>≥85                     | 116<br>315<br>1,289<br>2,442<br>4,215                    | Retrospective analysis includes 1 <sup>st</sup> 5 positions                                                                                                                                     |
| Elston 2012, Epidemiol Infect        | 2002 – 2009                    | Hull and East Yorkshire Hospitals <sup>c</sup> | Inpatients only                 | ≥16 y | ICD-10 codes (1 <sup>st</sup> position only): J18.0, J18.9, J13X, J18.1, and J15X                                                                                                                                                                                                                                                                                                                       | HAP included                               | Mid-year population estimates for Hull (city) and EroY (Surrounding County) from Office for National Statistics                                                                          | 143 (2002) – 207 (2009) | 15 –64<br>≥65                                                   | 48.8 – 84.1<br>543 – 781                                 | Fewer ICD-10 codes included than other analyses; Y95 Nosocomial infection included.                                                                                                             |
| Millet 2013, J Clin Epidemiol        | 1997 – 2011                    | UK                                             | Both inpatients and outpatients | ≥65 y | Read and ICD 10 codes; no specified codes provided. For ICD-10, used first diagnosis code for first episode of hospitalization only.                                                                                                                                                                                                                                                                    | HAP Excluded                               | Mid-year UK population estimates from Office for National Statistics                                                                                                                     | 799                     | 65 –69<br>70 –74<br>75 –79<br>80 –84 y<br>85 –89<br>≥90         | 281<br>431<br>694<br>1,205<br>2,184<br>4,194             | Incidence estimates converted to per 100,000 person-years                                                                                                                                       |
| Pick 2020, Thorax <sup>a</sup>       | 2013 – 2014<br><br>2017 – 2018 | Nottingham (2 large university hospitals)      | Inpatients only                 | ≥16 y | Inclusion criteria: one or more symptom suggestive of LRTI (defined as cough, increasing dyspnea, sputum production and fever), with evidence of acute infiltrates consistent with respiratory infection on admission radiography, and treated for a diagnosis of CAP Exclusion criteria: hospitalization within 10 days of index admission, a diagnosis of tuberculosis or post-obstructive pneumonia. | HAP Excluded                               | Mid-year estimates for the Greater Nottingham area from the Office for National Statistics, including local population data stratified by age group                                      | 96.3<br><br>158.4       | 16 –49<br>50 –64<br>65 –74<br>75 –84<br>≥85<br>16 –49<br>50 –64 | 27.3<br>80.2<br>181.3<br>400.6<br>707.5<br>29.9<br>146.9 | Only consented/enrolled subjects included in estimates Required CXR - confirmation but not all LRTI patients had CXR Census-derived denominator that may not have fully matched catchment area. |

1  
2  
3  
4  
5  
6  
7  
8  
9  
10  
11  
12  
13  
14  
15  
16  
17  
18  
19  
20  
21  
22  
23  
24  
25  
26  
27  
28  
29  
30  
31  
32  
33  
34  
35  
36  
37  
38  
39  
40  
41  
42  
43  
44  
45  
46

|                                            |                                |                              |                 |       |                                                                                                                                                                                                                                                                                                                                                   |                                                           |                                                                                                                                                                                          |                |                                                       |                                              |                                                                                                                                    |
|--------------------------------------------|--------------------------------|------------------------------|-----------------|-------|---------------------------------------------------------------------------------------------------------------------------------------------------------------------------------------------------------------------------------------------------------------------------------------------------------------------------------------------------|-----------------------------------------------------------|------------------------------------------------------------------------------------------------------------------------------------------------------------------------------------------|----------------|-------------------------------------------------------|----------------------------------------------|------------------------------------------------------------------------------------------------------------------------------------|
|                                            | 2013 – 2018                    |                              |                 |       |                                                                                                                                                                                                                                                                                                                                                   |                                                           |                                                                                                                                                                                          | 120.4          | 65 –74<br>75 –84<br>≥85                               | 310.4<br>559.5<br>1522.6                     | Required specific symptoms and evidence of treatment and some CAP events may not have had this information documented              |
|                                            |                                |                              |                 |       |                                                                                                                                                                                                                                                                                                                                                   |                                                           |                                                                                                                                                                                          | --             | --                                                    |                                              |                                                                                                                                    |
| Thorrington 2019, BMC Med                  | 2004 – 2005<br>2014 – 2015     | England                      | Inpatients only | ≥65 y | ICD 10 codes (1 <sup>st</sup> position only): J18 (pneumonia of unspecified causative organism)                                                                                                                                                                                                                                                   | HAP Included                                              | Mid-year population estimates for England for 2004 to 2015 from Office for National Statistics                                                                                           | NA             | ≥65                                                   | 829                                          | Incidence is per 100,000 person-years. Fewer ICD-10 codes included than other analyses                                             |
|                                            |                                |                              |                 |       |                                                                                                                                                                                                                                                                                                                                                   |                                                           |                                                                                                                                                                                          |                | ≥65                                                   | 1787                                         |                                                                                                                                    |
| Trotter 2008, EID                          | 1997 – 1998<br><br>2004 – 2005 | England                      | Inpatients only | ≥65 y | ICD 10 codes (1 <sup>st</sup> position only): J12 – J18                                                                                                                                                                                                                                                                                           | HAP Included                                              | Mid-year population estimates for England for 1997 to 2004 from the Office for National Statistics                                                                                       | NA             | 65 –74<br>75 –84<br>≥85                               | 263<br>684<br>1599                           | Incidence estimates converted to 100,000 population                                                                                |
|                                            |                                |                              |                 |       |                                                                                                                                                                                                                                                                                                                                                   |                                                           |                                                                                                                                                                                          |                | 65 –74                                                | 355                                          |                                                                                                                                    |
|                                            |                                |                              |                 |       |                                                                                                                                                                                                                                                                                                                                                   |                                                           |                                                                                                                                                                                          |                | 75 –84                                                | 877                                          |                                                                                                                                    |
|                                            |                                |                              |                 |       |                                                                                                                                                                                                                                                                                                                                                   |                                                           |                                                                                                                                                                                          |                | ≥85                                                   | 2218                                         |                                                                                                                                    |
| <b>Lower Respiratory Tract Infection</b>   |                                |                              |                 |       |                                                                                                                                                                                                                                                                                                                                                   | <b>Pneumonia</b>                                          |                                                                                                                                                                                          |                |                                                       |                                              |                                                                                                                                    |
| Current Study                              | 2018 – 2019                    | Bristol (Southmead Hospital) | Inpatients only | ≥18 y | Clinical signs/symptoms of heart failure or elevated pro-NT BNP or radiological change<br><b>AND</b><br>Retrospective ICD-10 code analysis: J09, J10, J11; J20, J21, J22, J40, J41, J42, J44, J45, and J46                                                                                                                                        | Excludes all Pneumonia                                    | Based on number of persons ≥18 years registered in referring GP practices. For practices with split referral patterns, number adjusted for percent of admissions that came to Southmead. | 802<br><br>739 | 18 –49<br>50 –64<br>65 –74<br>75 –84<br>≥85           | 254<br>448<br>1,252<br>2,442<br>6,116        |                                                                                                                                    |
| Lovering 2001, Clinical Micro. & Infection | 1994 – 1996                    | Bristol (Southmead Hospital) | Inpatients only | ≥16 y | LRTI episodes from four groups by ICD 9/10 codes: (1) CAP; (2) chest infection or acute exacerbation in presence of asthma; (3) chest infection or acute exacerbation in presence of COPD; or (4) bronchitis with no radiological evidence of pneumonia or pre-existing respiratory disease, such as COPD or asthma. No specified codes provided. | Includes Community-acquired Pneumonia<br><br>HAP Excluded | No information on denominator provided                                                                                                                                                   | 623            | 16 –39<br>40 –49<br>50 –59<br>60 –69<br>70 –79<br>>79 | 151<br>175<br>294<br>1,086<br>2,135<br>3,141 | Incidence converted to per 100,000 population<br>Study involved single hospital and no mention of source of denominator mentioned. |
| Millet                                     | 1997 –                         | UK                           | Both            | ≥65 y | Read and ICD 10 codes; no specified                                                                                                                                                                                                                                                                                                               | Includes                                                  | Mid-year UK population                                                                                                                                                                   | 12,293         | 65 –69                                                | 9,221                                        | Incidence                                                                                                                          |

|                             |           |                              |                                 |       |                                                                                                                                                                                                                                                                                                                                                                                       |                                                  |                                                                                                                                                                                                                                                                                                     |                |                                                                  |                                                |                                                                                                                                                              |
|-----------------------------|-----------|------------------------------|---------------------------------|-------|---------------------------------------------------------------------------------------------------------------------------------------------------------------------------------------------------------------------------------------------------------------------------------------------------------------------------------------------------------------------------------------|--------------------------------------------------|-----------------------------------------------------------------------------------------------------------------------------------------------------------------------------------------------------------------------------------------------------------------------------------------------------|----------------|------------------------------------------------------------------|------------------------------------------------|--------------------------------------------------------------------------------------------------------------------------------------------------------------|
| 2013, J Clin Epidemiol      | 2011      |                              | inpatients and outpatients      |       | codes provided. For ICD-10, used first diagnosis code for inpatient episode only.                                                                                                                                                                                                                                                                                                     | Community-acquired Pneumonia<br><br>HAP Excluded | estimates from Office for National Statistics. (Patients were not considered at risk for community-acquired LRTI during an LRTI illness-episode, during a HES hospitalization, or for 14 days after any HES hospitalization or CPRD hospital code. This person-time was excluded from denominator.) |                | 70–74<br>75–79<br>80–84<br>85–89<br>≥90                          | 10,740<br>12,607<br>15,137<br>18,791<br>26,287 | converted to per 100,000 person years                                                                                                                        |
| <b>All or First Episode</b> |           |                              |                                 |       |                                                                                                                                                                                                                                                                                                                                                                                       |                                                  |                                                                                                                                                                                                                                                                                                     |                |                                                                  |                                                |                                                                                                                                                              |
| <b>Heart Failure</b>        |           |                              |                                 |       |                                                                                                                                                                                                                                                                                                                                                                                       |                                                  |                                                                                                                                                                                                                                                                                                     |                |                                                                  |                                                |                                                                                                                                                              |
| Current Study               | 2018-2019 | Bristol (Southmead Hospital) | Inpatients only                 | ≥18 y | Clinical signs/symptoms of heart failure or elevated pro-NT BNP or radiological change<br><br><b>AND</b><br>Retrospective ICD-10 code analysis: I110; I130; I132; I50                                                                                                                                                                                                                 | All                                              | Based on number of persons ≥18 years registered in referring GP practices. For practices with split referral patterns, number adjusted for percent of admissions that came to Southmead.                                                                                                            | 328<br><br>402 | 18–49<br>50–64<br>65–74<br>75–84<br>≥85                          | 21<br>206<br>869<br>1,645<br>4,005             |                                                                                                                                                              |
| Uijl 2019, Eur J Heart Fail | 2000–2010 | UK                           | Both inpatients and outpatients | ≥55 y | 4 sources of HER were linked: CPRD primary care records, HES secondary care hospital charges, Myocardial Ischaemia National Audit Project (MINAP) disease registry, and ONS national death registry. HES ICD-10 codes: Heart failure: I110, I130, I132, I260, I50 and I21. Individuals were excluded if they presented a history of HF before their index date in CPRD, HES or MINAP. | First episode at 55 years or older counted       | Not Reported                                                                                                                                                                                                                                                                                        | Not Reported   | 55–64, M<br>55–64, F<br>65–74, M<br>65–74, F<br>>75, M<br>>75, F | 360<br>190<br>1,360<br>920<br>3,440<br>2,800   | Incidence converted to per 100,000 person years<br>Included first episode of HF (inpatient or outpatient) at age 55 and up, so repeat episodes not included. |

<sup>a</sup> Only the most recent incidence estimates from the Nottingham CAP study were included.

<sup>b</sup> Add text names for all listed ICD codes in this footnote or appendix.

<sup>c</sup> Included hospitals were Hull Royal Infirmary, Castle Hill Hospital, Princess Royal Hospital, Scarborough District General Hospital, Bridlington & District Hospital, York Teaching Hospital, Scunthorpe General Hospital, Goole & District Hospital.

<sup>d</sup> For the current study, only age-group estimates from the retrospective analysis were included in this table, but these were closely comparable to the annualized incidence estimates based on the prospective review. See Table 3 for full results.



## STROBE Statement—checklist of items that should be included in reports of observational studies

|                              | Item No | Recommendation                                                                                                                                                                                                                                                                                                                                                                                                                                                         | Page No |
|------------------------------|---------|------------------------------------------------------------------------------------------------------------------------------------------------------------------------------------------------------------------------------------------------------------------------------------------------------------------------------------------------------------------------------------------------------------------------------------------------------------------------|---------|
| <b>Title and abstract</b>    | 1       | (a) Indicate the study's design with a commonly used term in the title or the abstract                                                                                                                                                                                                                                                                                                                                                                                 | 3       |
|                              |         | (b) Provide in the abstract an informative and balanced summary of what was done and what was found                                                                                                                                                                                                                                                                                                                                                                    | 3       |
| <b>Introduction</b>          |         |                                                                                                                                                                                                                                                                                                                                                                                                                                                                        |         |
| Background/rationale         | 2       | Explain the scientific background and rationale for the investigation being reported                                                                                                                                                                                                                                                                                                                                                                                   | 5-6     |
| Objectives                   | 3       | State specific objectives, including any prespecified hypotheses                                                                                                                                                                                                                                                                                                                                                                                                       | 6       |
| <b>Methods</b>               |         |                                                                                                                                                                                                                                                                                                                                                                                                                                                                        |         |
| Study design                 | 4       | Present key elements of study design early in the paper                                                                                                                                                                                                                                                                                                                                                                                                                | 7       |
| Setting                      | 5       | Describe the setting, locations, and relevant dates, including periods of recruitment, exposure, follow-up, and data collection                                                                                                                                                                                                                                                                                                                                        | 7-9     |
| Participants                 | 6       | (a) <i>Cohort study</i> —Give the eligibility criteria, and the sources and methods of selection of participants. Describe methods of follow-up<br><i>Case-control study</i> —Give the eligibility criteria, and the sources and methods of case ascertainment and control selection. Give the rationale for the choice of cases and controls<br><i>Cross-sectional study</i> —Give the eligibility criteria, and the sources and methods of selection of participants | 7-9     |
|                              |         | (b) <i>Cohort study</i> —For matched studies, give matching criteria and number of exposed and unexposed<br><i>Case-control study</i> —For matched studies, give matching criteria and the number of controls per case                                                                                                                                                                                                                                                 |         |
| Variables                    | 7       | Clearly define all outcomes, exposures, predictors, potential confounders, and effect modifiers. Give diagnostic criteria, if applicable                                                                                                                                                                                                                                                                                                                               | 8       |
| Data sources/<br>measurement | 8*      | For each variable of interest, give sources of data and details of methods of assessment (measurement). Describe comparability of assessment methods if there is more than one group                                                                                                                                                                                                                                                                                   | 7-8     |
| Bias                         | 9       | Describe any efforts to address potential sources of bias                                                                                                                                                                                                                                                                                                                                                                                                              | 15-16   |
| Study size                   | 10      | Explain how the study size was arrived at                                                                                                                                                                                                                                                                                                                                                                                                                              | 7-8     |
| Quantitative variables       | 11      | Explain how quantitative variables were handled in the analyses. If applicable, describe which groupings were chosen and why                                                                                                                                                                                                                                                                                                                                           | 8-9     |
| Statistical methods          | 12      | (a) Describe all statistical methods, including those used to control for confounding                                                                                                                                                                                                                                                                                                                                                                                  | 9       |
|                              |         | (b) Describe any methods used to examine subgroups and interactions                                                                                                                                                                                                                                                                                                                                                                                                    | NA      |
|                              |         | (c) Explain how missing data were addressed                                                                                                                                                                                                                                                                                                                                                                                                                            | NA      |
|                              |         | (d) <i>Cohort study</i> —If applicable, explain how loss to follow-up was addressed<br><i>Case-control study</i> —If applicable, explain how matching of cases and controls was addressed<br><i>Cross-sectional study</i> —If applicable, describe analytical methods taking account of sampling strategy                                                                                                                                                              | NA      |
|                              |         | (e) Describe any sensitivity analyses                                                                                                                                                                                                                                                                                                                                                                                                                                  | NA      |

Continued on next page

| <b>Results</b>           |     |                                                                                                                                                                                                              |              |
|--------------------------|-----|--------------------------------------------------------------------------------------------------------------------------------------------------------------------------------------------------------------|--------------|
| Participants             | 13* | (a) Report numbers of individuals at each stage of study—eg numbers potentially eligible, examined for eligibility, confirmed eligible, included in the study, completing follow-up, and analysed            | 10, 21-24    |
|                          |     | (b) Give reasons for non-participation at each stage                                                                                                                                                         | NA           |
|                          |     | (c) Consider use of a flow diagram                                                                                                                                                                           | 24           |
| Descriptive data         | 14* | (a) Give characteristics of study participants (eg demographic, clinical, social) and information on exposures and potential confounders                                                                     | 21-24        |
|                          |     | (b) Indicate number of participants with missing data for each variable of interest                                                                                                                          | NA           |
|                          |     | (c) <i>Cohort study</i> —Summarise follow-up time (eg, average and total amount)                                                                                                                             | NA           |
| Outcome data             | 15* | <i>Cohort study</i> —Report numbers of outcome events or summary measures over time                                                                                                                          | 10-11, 21-24 |
|                          |     | <i>Case-control study</i> —Report numbers in each exposure category, or summary measures of exposure                                                                                                         | NA           |
|                          |     | <i>Cross-sectional study</i> —Report numbers of outcome events or summary measures                                                                                                                           | NA           |
| Main results             | 16  | (a) Give unadjusted estimates and, if applicable, confounder-adjusted estimates and their precision (eg, 95% confidence interval). Make clear which confounders were adjusted for and why they were included | 11           |
|                          |     | (b) Report category boundaries when continuous variables were categorized                                                                                                                                    | NA           |
|                          |     | (c) If relevant, consider translating estimates of relative risk into absolute risk for a meaningful time period                                                                                             | NA           |
| Other analyses           | 17  | Report other analyses done—eg analyses of subgroups and interactions, and sensitivity analyses                                                                                                               | 10, 21-25    |
| <b>Discussion</b>        |     |                                                                                                                                                                                                              |              |
| Key results              | 18  | Summarise key results with reference to study objectives                                                                                                                                                     | 12           |
| Limitations              | 19  | Discuss limitations of the study, taking into account sources of potential bias or imprecision. Discuss both direction and magnitude of any potential bias                                                   | 15           |
| Interpretation           | 20  | Give a cautious overall interpretation of results considering objectives, limitations, multiplicity of analyses, results from similar studies, and other relevant evidence                                   | 12-16        |
| Generalisability         | 21  | Discuss the generalisability (external validity) of the study results                                                                                                                                        | 12-16        |
| <b>Other information</b> |     |                                                                                                                                                                                                              |              |
| Funding                  | 22  | Give the source of funding and the role of the funders for the present study and, if applicable, for the original study on which the present article is based                                                | 1            |

\*Give information separately for cases and controls in case-control studies and, if applicable, for exposed and unexposed groups in cohort and cross-sectional studies.

**Note:** An Explanation and Elaboration article discusses each checklist item and gives methodological background and published examples of transparent reporting. The STROBE checklist is best used in conjunction with this article (freely available on the Web sites of PLoS Medicine at <http://www.plosmedicine.org/>, Annals of Internal Medicine at <http://www.annals.org/>, and Epidemiology at <http://www.epidem.com/>). Information on the STROBE Initiative is available at [www.strobe-statement.org](http://www.strobe-statement.org).

# BMJ Open

## Incidence of Hospitalized Acute Lower Respiratory Tract Disease Including Pneumonia and Lower Respiratory Tract Infection in Bristol, England, 2019

|                                 |                                                                                                                                                                                                                                                                                                                                                                                                                                                                                                                                                               |
|---------------------------------|---------------------------------------------------------------------------------------------------------------------------------------------------------------------------------------------------------------------------------------------------------------------------------------------------------------------------------------------------------------------------------------------------------------------------------------------------------------------------------------------------------------------------------------------------------------|
| Journal:                        | <i>BMJ Open</i>                                                                                                                                                                                                                                                                                                                                                                                                                                                                                                                                               |
| Manuscript ID                   | bmjopen-2021-057464.R1                                                                                                                                                                                                                                                                                                                                                                                                                                                                                                                                        |
| Article Type:                   | Original research                                                                                                                                                                                                                                                                                                                                                                                                                                                                                                                                             |
| Date Submitted by the Author:   | 29-Mar-2022                                                                                                                                                                                                                                                                                                                                                                                                                                                                                                                                                   |
| Complete List of Authors:       | Hyams, Catherine; University of Bristol, Academic Respiratory Unit; University of Bristol, Bristol Vaccine Centre<br>Begier, Elizabeth; Pfizer Inc<br>Garcia Gonzalez, Maria; University of Bristol; Southmead Hospital, Academic Respiratory Unit<br>Southern, Jo; Pfizer Ltd<br>Campling, James; Pfizer Ltd<br>Gray, Sharon; Pfizer Inc<br>Oliver, Jennifer; University of Bristol, Schools of Cellular and Molecular Medicine and Population Health Sciences<br>Gessner, Bradford; Pfizer Inc<br>Finn, Adam; University of Bristol, Bristol Vaccine Centre |
| <b>Primary Subject Heading</b>: | Respiratory medicine                                                                                                                                                                                                                                                                                                                                                                                                                                                                                                                                          |
| Secondary Subject Heading:      | Infectious diseases, Epidemiology                                                                                                                                                                                                                                                                                                                                                                                                                                                                                                                             |
| Keywords:                       | Heart failure < CARDIOLOGY, Respiratory infections < THORACIC MEDICINE, Epidemiology < INFECTIOUS DISEASES                                                                                                                                                                                                                                                                                                                                                                                                                                                    |
|                                 |                                                                                                                                                                                                                                                                                                                                                                                                                                                                                                                                                               |

SCHOLARONE™  
Manuscripts

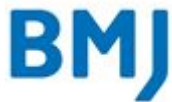

I, the Submitting Author has the right to grant and does grant on behalf of all authors of the Work (as defined in the below author licence), an exclusive licence and/or a non-exclusive licence for contributions from authors who are: i) UK Crown employees; ii) where BMJ has agreed a CC-BY licence shall apply, and/or iii) in accordance with the terms applicable for US Federal Government officers or employees acting as part of their official duties; on a worldwide, perpetual, irrevocable, royalty-free basis to BMJ Publishing Group Ltd ("BMJ") its licensees and where the relevant Journal is co-owned by BMJ to the co-owners of the Journal, to publish the Work in this journal and any other BMJ products and to exploit all rights, as set out in our [licence](#).

The Submitting Author accepts and understands that any supply made under these terms is made by BMJ to the Submitting Author unless you are acting as an employee on behalf of your employer or a postgraduate student of an affiliated institution which is paying any applicable article publishing charge ("APC") for Open Access articles. Where the Submitting Author wishes to make the Work available on an Open Access basis (and intends to pay the relevant APC), the terms of reuse of such Open Access shall be governed by a Creative Commons licence – details of these licences and which [Creative Commons](#) licence will apply to this Work are set out in our licence referred to above.

Other than as permitted in any relevant BMJ Author's Self Archiving Policies, I confirm this Work has not been accepted for publication elsewhere, is not being considered for publication elsewhere and does not duplicate material already published. I confirm all authors consent to publication of this Work and authorise the granting of this licence.

**Title:** Incidence of Hospitalized Acute Lower Respiratory Tract Disease Including Pneumonia and Lower Respiratory Tract Infection in Bristol, England, 2019

**Authors:** Catherine Hyams<sup>1,2,3</sup>, Elizabeth Begier<sup>4</sup>, Maria Garcia Gonzalez<sup>1,2</sup>, Jo Southern<sup>5</sup>, James Campling<sup>5</sup>, Sharon Gray<sup>4</sup>, Jennifer Oliver<sup>1</sup>, Bradford D. Gessner<sup>4</sup>, Adam Finn<sup>1</sup>

**Affiliations:**

<sup>1</sup> Bristol Vaccine Centre, Schools of Cellular and Molecular Medicine and Population Health Sciences, University of Bristol, Bristol, BS2 8AE, United Kingdom

<sup>2</sup> Academic Respiratory Unit, Learning and Research Building, Southmead Hospital, Bristol, UK, BS10 5NB

<sup>3</sup> Acute Medical Unit, Southmead Hospital, Bristol, UK, BS10 5NB

<sup>4</sup> Vaccines Medical Development, Scientific and Clinical Affairs, Pfizer Inc, Collegetown, PA, USA

<sup>5</sup> Vaccines Medical Affairs, Pfizer Ltd, Tadworth, UK, KT20 7NS

**Corresponding author:** Catherine Hyams, MBBS BSc(Hons) PhD  
Population Health Sciences, University of Bristol,  
Bristol, BS2 8AE,  
United Kingdom  
catherine.hyams@nbt.nhs.uk  
Catherine.hyams@bristol.ac.uk

**Alternate author:** Maria Garcia Gonzalez  
qa18884@bristol.ac.uk

**Running Title:** Incidence of acute lower respiratory tract disease in adults

**Keywords:** Pneumonia, respiratory infection, lower respiratory tract infection, heart failure

**Funding:** CH was funded by the National Institute for Health Research (NIHR) [NIHR Academic Clinical Fellowship (ACF-2015-25-002)]. The views expressed are those of the author(s) and not necessarily those of the NIHR or the Department of Health and Social Care. The remainder of the study funding was from Pfizer, Inc (W1255886-1).

1  
2  
3 **Competing Interests:** EB, JS, JC, SG, and BG are full time employees of Pfizer Vaccines and hold  
4  
5 stock or stock options. CH is Principal Investigator of the Avon CAP study  
6  
7 which is an investigator-led University of Bristol study funded by Pfizer and  
8  
9 has previously received support from the NIHR in an Academic Clinical  
10  
11 Fellowship. AF is a member of the Joint Committee on Vaccination and  
12  
13 Immunization (JCVI) and chair of the World Health Organization European  
14  
15 Technical Advisory Group of Experts on Immunization (ETAGE) committee. In  
16  
17 addition to receiving funding from Pfizer as Chief Investigator of this study,  
18  
19 he leads another project investigating transmission of respiratory bacteria in  
20  
21 families jointly funded by Pfizer and the Gates Foundation. The other  
22  
23 authors have no relevant conflicts of interest to declare.  
24  
25  
26  
27

28 **Word count:** 2997/4000  
29  
30  
31  
32

33 **Summary (38/40 words):** Using both retrospective and prospective methodologies, we found a high  
34  
35 annual incidence of acute lower respiratory disease (>1700 per 100000; 1.7%) in and around Bristol,  
36  
37 UK: pneumonia (~0.6%), lower respiratory tract infection without pneumonia (>0.7%), and heart  
38  
39 failure (>0.3%).  
40  
41

42 **Author Contributions:** CH, EB, MGG, JS, BDG and AF generated the research questions and analysis  
43  
44 plan CH, EB, MGG, JS, JC, SG and BDG undertook and contributed to the data  
45  
46 analysis. AF oversaw the research and data collection which was undertaken by  
47  
48 CH and MGG. All authors contributed to the preparation of the manuscript.  
49  
50  
51  
52  
53  
54  
55  
56  
57  
58  
59  
60

1  
2  
3 **1 Abstract (278/300):**

4  
5 **2 Objectives**

6  
7  
8 3 To determine the disease burden of acute lower respiratory tract disease (aLRTD) and its subsets  
9  
10 4 (pneumonia, lower respiratory tract infection [LRTI], heart failure) in hospitalized adults in Bristol, UK.

11  
12  
13 **5 Setting**

14  
15  
16 6 Single-centre, secondary care hospital, Bristol UK

17  
18  
19 **7 Design**

20  
21  
22 8 We estimated aLRTD hospitalizations incidence in adults ( $\geq 18$  years) in Bristol, UK using two  
23  
24 9 approaches. First, retrospective ICD-10 code analysis (first five positions/hospitalization) identified  
25  
26 10 aLRTD events over a 12-month period (March2018–Feb2019). Secondly, during a 21-day prospective  
27  
28 11 review (19Aug–9Sept2019), aLRTD admissions were identified, categorized by diagnosis, and  
29  
30 12 subsequently annualized. Hospital catchment denominators were calculated using linked general  
31  
32 13 practice and hospitalization data, with each practice's denominator contribution calculated based on  
33  
34 14 practice population and percent of the practices' hospitalizations admitted to the study hospital.

35  
36  
37  
38 **15 Participants**

39  
40  
41 16 Prospective review: 1322 adults screened; 410 identified with aLRTD. Retrospective review: 7727 adult  
42  
43 17 admissions.

44  
45  
46 **18 Primary and Secondary outcome measures**

47  
48  
49 19 The incidence of aLRTD and its subsets in the adult population of Southmead Hospital, Bristol UK.

50  
51  
52 **20 Results**

53  
54  
55 21 Based on ICD-10 code analysis, annual incidences per 100000 population were: aLRTD, 1901;  
56  
57 22 pneumonia, 591; LRTI, 739; heart failure, 402. aLRTD incidence was highest among those  $\geq 65$ -years:  
58  
59 23 65–74 (3684 per 100000 adults), 75–84 (6962 per 100000 adults), and  $\geq 85$  (11430 per 100000 adults).

24 During the prospective review, 410/1322 (31%) hospitalized adults had aLRTD signs/symptoms, and  
25 annualized incidences closely replicated retrospective analysis results.

## 26 **Conclusions**

27 aLRTD disease burden was high, increasing sharply with age. aLRTD incidence is probably higher than  
28 estimated previously due to criteria specifying respiratory-specific symptoms or radiological change,  
29 usage of only the first diagnosis code, and mismatch between case count sources and population  
30 denominators. This may have significant consequences for healthcare planning, including usage of  
31 current and future vaccinations against respiratory infection.

## 34 ***Strengths and Limitations of This Study***

- 35 • We used two analytical methods at the same site over a comparable period, to calculate  
36 incidence using both prospective and retrospective approaches.
- 37 • The case burden of aLRTD and its subgroups was pre-defined and included patients with  
38 atypical presentations
- 39 • We calculated incidence using a denominator derived from GP records, providing increased  
40 accuracy compared to population calculations based on census data.
- 41 • This was a single-center study, with a predominantly Caucasian cohort; therefore, the findings  
42 might not be generalizable to other populations.
- 43 • The ICD-10 coding data analysis was limited to codes within the first five positions, and  
44 therefore may have excluded some cases where other diagnoses were placed higher in the  
45 diagnostic coding hierarchy.



## 47 Introduction

48 Acute lower respiratory tract disease (aLRTD) encompasses pneumonia, non-pneumonic lower  
49 respiratory tract infection (NP-LRTI), acute bronchitis, exacerbation of underlying respiratory diseases  
50 (including asthma and chronic obstructive pulmonary disease [COPD]), and acute heart failure (HF)  
51 events resulting in respiratory symptoms (e.g. breathlessness). Before the COVID-19 pandemic,  
52 European healthcare costs for pneumonia alone in adults were estimated at €10 billion annually,  
53 including €5.7 billion for inpatient care. [1] Pneumonia incidence in Europe varies by country and intra-  
54 country region, age, socioeconomic status, and gender; [2-4] however, in all studies pneumonia  
55 incidence in adults increases sharply with age. [3] Pneumonia affects an estimated 0.5% to 1% of UK  
56 adults each year [5, 6]. Overall LRTI incidence is considerably higher with ~15% of UK adults aged ≥65  
57 years experiencing an event each year.[7] Whilst HF is not typically clinically included as an acute  
58 respiratory illness, HF with respiratory symptoms may be caused by respiratory viral infection, such as  
59 respiratory syncytial virus (RSV), either acutely or 3-4 weeks after the primary infection [8, 9].

60  
61 However, aLRTD incidence may be considerably higher than previously reported, given that published  
62 literature has documented several reasons why previous estimates may have been erroneously low  
63 [1]. Estimates of aLRTD based on pneumonia defined as radiologically demonstrated alveolar  
64 infiltrates, may underestimate true disease burden as chest radiography (CXR) is an imperfect gold-  
65 standard. [10, 11] Immunosuppressed, elderly or dehydrated patients are likely to be under-  
66 represented if respiratory infection is defined by radiologically demonstrated changes. [10, 11]  
67 Microbiological investigations for pneumonia are undertaken variably and identify a causative  
68 pathogen in 50% of cases at most [12, 13]; hence, the disease is probably under-reported when  
69 confirmed microbiological diagnosis is required. Furthermore, Respiratory Syncytial Virus (RSV)  
70 infection has recently been recognized as an important respiratory pathogen later in life, [9] with  
71 severe disease occurring in patient groups in whom the diagnosis is likely to be under-recognized (e.g.

1  
2  
3 72 the elderly or those with underlying cardiac conditions). [8] Studies of clinical coding data are  
4  
5 73 retrospective and subject to recognized limitations associated with this methodology [14, 15]. Older  
6  
7 74 patients with pneumonia often have atypical presenting signs and symptoms, which may lead to  
8  
9 75 missed or incorrect admission diagnoses. [16] Pneumonia may occur secondary to, or be an underlying  
10  
11 76 cause of, the main presenting complaint, particularly in patients with cerebrovascular accidents (CVA),  
12  
13  
14 77 HF, COPD exacerbations or altered consciousness levels. [17] In these scenarios, pneumonia may not  
15  
16 78 be the primary hospitalization diagnosis code and may not even be coded as an associated diagnosis.  
17  
18  
19 79  
20  
21  
22 80 There are many studies examining the incidence of acute respiratory illness in children; however, data  
23  
24 81 on respiratory illness in adults in the UK is lacking. Given the paucity of data supporting accurate aLRTD  
25  
26 82 incidence rates and its disease subsets in adults, we undertook to assess aLRTD incidence by two  
27  
28 83 approaches (retrospective and prospective) in Bristol, UK, seeking to determine the disease burden of  
29  
30 84 hospitalized aLRTD and its subgroups more accurately.  
31  
32  
33  
34 85  
35  
36  
37  
38  
39  
40  
41  
42  
43  
44  
45  
46  
47  
48  
49  
50  
51  
52  
53  
54  
55  
56  
57  
58  
59  
60

## 86 **Methods**

### 87 *Study Design*

88 This study was conducted at a large secondary care institution in UK (North Bristol NHS Trust) with  
89 specialist Respiratory Services (interstitial lung disease, pleural disease). Two approaches were  
90 undertaken to estimate aLRTD incidence: (1) “retrospective analysis” of aLRTD International  
91 Classification of Diseases Tenth Revision (ICD-10) diagnostic codes for an entire year; and, (2) 21-day  
92 observational “prospective review” of aLRTD hospital admissions.

### 93 *Ethics*

94 This study was approved by North Bristol NHS Trust Research Audit Ethics Committee (CA52218).

### 95 *Patient and Public Involvement*

96 No patient involved.

### 97 *Retrospective Analysis*

98 For the retrospective analysis, all adult inpatient admissions ( $\geq 18$  years) obtained from Hospital  
99 Episode Statistic (HES) to the study hospital during March 2018–February 2019 with aLRTD ICD-10  
100 diagnostic codes (Supplementary data 1) in any of the first 5 positions were identified and categorized  
101 into aLRTD subgroups: pneumonia, NP-LRTI, other LRTD, and HF (Supplementary data 2). A mutually  
102 exclusive hierarchy was used (pneumonia, NP-LRTI, then other LRTD) although HF diagnoses could co-  
103 occur with other categories. “Other LRTD” included acute respiratory events that could not definitively  
104 be placed in another category. Only the first 5 ICD-10 codes were available for analysis.

### 105 *Prospective Review*

106 Adult patients ( $\geq 18$  years) resident within Bristol, North Somerset, and South Gloucestershire Clinical  
107 Commissioning Group (CCG) referred to the Acute Medical Unit (AMU) at North Bristol NHS Trust  
108 during 19<sup>th</sup> August –9<sup>th</sup> September 2019 were included in an audit on acute respiratory illness. This

1  
2  
3 109 time period was selected because it was felt to represent a period when there were an average  
4  
5 110 number of adults hospitalised with aLRTD. A respiratory physician (CH) reviewed presenting features  
6  
7 111 and investigation results for each admitted patient to determine whether aLRTD was present. Further  
8  
9  
10 112 medical record review was undertaken if patients had: new/worsening breathlessness, cough or  
11  
12 113 sputum production; new or worsening peripheral oedema; pleurisy; clinical examination findings  
13  
14 114 consistent with respiratory infection or HF; or fever attributable to suspected respiratory infection.  
15  
16 115 Patients with non-respiratory diagnoses were excluded. There were no patient refusals for either  
17  
18  
19 116 approach.

#### 21 117 *Prospective Review Outcome measures*

23  
24 118 aLRTD was considered confirmed in individuals with: new/worsening respiratory symptoms, with or  
25  
26  
27 119 without fever; sepsis, delirium or raised inflammatory markers attributable to likely respiratory  
28  
29 120 infection in admitting clinical team's opinion; radiological change in keeping with infection (e.g.  
30  
31 121 consolidation); and/or final diagnosis of NP-LRTI, pneumonia or infective exacerbation of a chronic  
32  
33 122 respiratory condition. A pneumonia diagnosis was assigned if radiological changes likely due to  
34  
35  
36 123 infection were described by the reporting radiologist. An NP-LRTI diagnosis was assigned if aLRTD signs  
37  
38 124 and symptoms likely to be due to infection were present without demonstrated radiological change.  
39  
40 125 A HF diagnosis was assigned in presence of: new/worsening breathlessness and bi-basal crepitations,  
41  
42 126 cardiac wheeze or new/worsening bilateral pitting oedema; elevated pro-NT BNP ( $\geq 450$ pg/mL);  
43  
44 127 radiologist-reported radiographic changes consistent with cardiac failure; or a final consultant  
45  
46  
47 128 physician diagnosis of HF, cardiac failure or left-ventricular failure. When present,  $\geq 1$  diagnosis was  
48  
49 129 selected.

51  
52 130 For both retrospective and prospective studies, pneumonia included both community and healthcare  
53  
54 131 setting acquired cases; although, the prospective review only captured admitting diagnoses and  
55  
56 132 pneumonias occurring later during hospitalization were not included.

#### 59 133 *Incidence calculations*

1  
2  
3 134 Annual incidence per 100000 persons was calculated for both retrospective and prospective studies.  
4  
5 135 Case counts from prospective review were annualized (i.e., case counts by diagnosis and overall were  
6  
7 136 divided by the percentage of annual admissions for these diagnosis groups that occurred in this 21-  
8  
9  
10 137 day period in the retrospective analysis).

### 138 *Incidence Denominators*

139 To calculate appropriate population denominators for incidence calculations, aLRTD hospital  
140 admission event data were linked to aggregated GP practice patient registration data within the NHS  
141 Bristol, North Somerset, and South Gloucestershire CCG for 2017–2019. Only 4% of patients sought  
142 care at North Bristol NHS Trust hospital from outside these local CCGs, despite presence of specialist  
143 respiratory services. In the UK, GP registration is available free of charge for all, regardless of  
144 residential status. For GP practices within these same CCGs, the proportion of their aLRTD admissions  
145 occurring at North Bristol NHS Trust was multiplied by their patient registration count in 2019 by age  
146 group, to get each practice's contribution to the denominator (e.g. if 50% aLRTD admissions were at  
147 North Bristol among persons 50–64 years, the practice would contribute half of their patients 50–64  
148 years to the denominator). Further details of this methodology have been described previously. [18]

149

### 150 *Statistical analysis*

151 Patient characteristics were tabulated by aLRTD diagnosis. Categorical variables were presented as  
152 counts with percentages. Continuous data are presented with means and standard deviations (SD) if  
153 normally distributed and medians and interquartile range (IQR) if not normally distributed. Patient  
154 groups difference were evaluated using the Friedman test with Wilcoxon signed-rank test.

## 156 **Results**

### 157 *Retrospective analysis*

158 Over a 12-month period, we identified 7727 hospital admissions for aLRTD: 3005 NP-LRTI admissions,  
159 2402 pneumonia, 1633 HF and 1071 other LRTD (Table 1). aLRTD admissions were lowest in March  
160 and April and highest December through February (Figure 1A), overall and for all aLRTD subgroups  
161 ( $P<0.05$ ) (Figure 1B-D). Overall, 28.1% (2244) cases were identified as being potentially hospital-  
162 acquired infection based on co-occurring ICD-10 code 'Y95 Nosocomial Infection'.

### 164 *Prospective review*

165 Among 1322 eligible adult patients referred to AMU over the 21-day review period (Figure 2), 410  
166 patients had signs or symptoms of aLRTD: 188 (46%) NP-LRTI; 152 (37%) pneumonia, and 77 (19%) HF.  
167 Seven patients had both decompensated HF and a respiratory infection at hospital admission. On  
168 admission, >10% of aLRTD patients did not have respiratory symptoms: 16 (11%) pneumonia, 25 (13%)  
169 NP-LRTI, and 18 (14%) HF (Table 2).

170 Almost all adults admitted with aLRTD underwent routine biochemistry, hematology, and radiological  
171 investigation (99.9%,  $n=409$ ). In contrast, only 150 (37%) patients with aLRTD had microbiological  
172 testing performed: blood cultures ( $n=149$ , 36%) and urine cultures ( $n=143$ , 35%). Pneumonia patients  
173 more commonly underwent microbiological investigation than NP-LRTI patients ( $P<0.05$ ) with highest  
174 disparity in rates of sputum culture, urinary antigens, and respiratory viral PCR (Table 2). All cardiac  
175 failure patients who underwent microbiological investigation had concomitant respiratory infection  
176 (Table 2). Overall, a microbiological diagnosis was found in 11 (3%) cases, highlighting the low  
177 frequency of definitive pathogen identification in aLRTD. Younger patients underwent microbiological  
178 testing more frequently than the elderly for all aLRTD categories (Table 2).

179

1  
2  
3 180 *Disease incidence*  
4  
5

6 181 Retrospective analysis yielded an overall aLRTD incidence of 1901 per 100000. Disease incidence rose  
7  
8 182 with increasing age (Table 3), both overall and for all disease subgroups; incidences per 100000 among  
9  
10 183 adults aged  $\geq 85$  years were: 11430 (aLRTD), 6116 (NP-LRTI), 4215 (pneumonia) and 4005 (HF). Overall,  
11  
12 184 28.1% aLRTD hospitalizations also included an ICD-10 discharge code for 'nosocomial infection',  
13  
14 185 suggesting the aLRTD event or other infection was hospital-acquired. For pneumonia 25.3% had the  
15  
16 186 nosocomial infection code. If all of these were related to the pneumonia diagnosis, an estimated  
17  
18 187 residual 1794 events would have been community-acquired pneumonia (annual incidence  
19  
20 188 441/100000 adults). Among older age categories, where the incidence of aLRTD was highest, NP-LRTI  
21  
22 189 incidence was similar to pneumonia incidence, with an approximate 1:1 ratio of NP-LRTI to pneumonia  
23  
24 190 cases. However, among adults under age 50 years, there were approximately twice as many NP-LRTI  
25  
26 191 cases observed as pneumonia cases. Incidence calculations using annualized prospective review  
27  
28 192 results were broadly comparable with retrospective analysis of ICD-10 data (Table 3).  
29  
30  
31  
32  
33  
34  
35  
36  
37  
38  
39  
40  
41  
42  
43  
44  
45  
46  
47  
48  
49  
50  
51  
52  
53  
54  
55  
56  
57  
58  
59  
60

**Discussion:**

This is the first UK study to assess aLRTD incidence comprehensively. We conducted an analysis of 12-months of hospital admissions by ICD-10 diagnosis code data and a 21-day prospective review at a large academic hospital in southwest England. With both approaches, we found a high annual incidence of aLRTD (>1700 per 100000; 1.7%), pneumonia (~0.6%), NP-LRTI without pneumonia (>0.7%), and HF (>0.4%). Incidences increased sharply in a non-linear manner as age increased above 65 years for all aLRTD categories. These results suggest rates are probably significantly higher than previous disease estimates from the UK (Table 4) but comparable with many results globally, [19, 20] with important consequences for healthcare resources. For example, a recent review highlighted that pneumonia incidences ranged from 1000 to 2500 per 100000 (1–2.5%) among persons aged 65–74 years in Spain, Germany, France, Japan and the US, which are comparable to the >1250 per 100000 (1.3%) reported here. Some of the potential sources of underestimation for other UK incidence studies (Table 4) include: case source and denominator mismatch; use of first position in ICD-code analysis only; inclusion of enrolled subjects in consent-based prospective studies only; requiring specific symptoms and chest x-ray confirmation in order to be classified as pneumonia/aLRTD; and, lastly, the rising incidence of aLRTD.

*Comparison with published literature*

No studies have reported aLRTD incidence comprehensively in UK hospitalized patients within the last 20 years. However, eight publications report incidence of  $\geq 1$  aLRTD subgroup. Seven publications reported community-acquired pneumonia (CAP) incidence (three from Nottingham, UK). For pneumonia, our incidence estimates were three to four-fold higher than other UK inpatient incidence estimates (Table 4) but comparable to estimates from other countries. [19, 20] Only two UK studies from approximately 20 years ago reported NP-LRTI incidence (one with both CAP and NP-LRTIs; Table 4), and only one provided an inpatient estimate. [21] NP-LRTI incidence was approximately 2-fold



1  
2  
3 218 lower than that calculated here, taking into account inclusion of CAP and other NP-LRTI in their  
4  
5 219 estimates. [21, 22] The one UK study reporting HF incidence had methodological differences (i.e.,  
6  
7 220 inclusion of outpatients and limiting to initial HF diagnosis) and estimates could not be compared. [23]  
8  
9 221 Close examination of the existing literature methods yielded multiple sources for potential  
10  
11 222 underestimation.  
12  
13  
14

15 223 First, for incidence studies that were not countrywide, identifying an appropriate denominator is  
16  
17 224 challenging. Like many other inpatient settings worldwide, UK hospitals' catchment areas for acute  
18  
19 225 treatment are principally driven by geography, but the proportion of any area's residents expected to  
20  
21 226 use the hospital becomes less clear as distance from the hospital increases because catchment areas  
22  
23 227 and populations of different hospitals may overlap. Defining hospital catchment populations based  
24  
25 228 solely on census data cannot account for this variability. Including all geographic areas using the  
26  
27 229 hospital to any extent results in population denominator overestimation and underestimated  
28  
29 230 incidence. Here, we addressed this by calculating population denominators based on hospital  
30  
31 231 utilization behavior from referring General Practices.  
32  
33  
34  
35

36 232 Second, other studies used fewer codes in their ICD code analysis: all limited their analyses to events  
37  
38 233 where the diagnostic code was in the first position (Table 4; case definition column), potentially  
39  
40 234 excluding admissions in which pneumonia/NP-LRTI complicated other underlying respiratory diseases,  
41  
42 235 including COPD and asthma. Limiting to first position has been shown to reduce sensitivity for  
43  
44 236 pneumonia events by about 30% (66%–72% sensitive). [22, 24] Conversely, the recent British Thoracic  
45  
46 237 Society (BTS) audit on CAP found ~27% of pneumonia events identified by ICD code (J12-18) had no  
47  
48 238 new CXR infiltrates. [6] Even accounting for this potential over coding practice, our estimates remain  
49  
50 239 well above other published UK estimates.  
51  
52  
53

54 240 Third, for other prospective studies, exclusion of events where patients did not consent to  
55  
56 241 participation or were not identified by study surveillance processes (often conducted predominately  
57  
58 242 during business hours) can introduce underestimation. Further, other prospective pneumonia studies  
59  
60

1  
2  
3 243 specifically required documentation of specific symptoms, radiological findings, and treatments, [25]  
4  
5 244 potentially excluding those without these features documented in medical records. In our prospective  
6  
7 245 review, approximately 11% did not display typical signs and symptoms of pneumonia and could have  
8  
9 246 been excluded by that requirement. Requiring CXR confirmation has been shown to reduce incidence  
10  
11 247 estimates for pneumonia, [20] although all pneumonia events in our prospective review were  
12  
13 248 radiologically confirmed.

14  
15  
16  
17 249 Fourth, trends over time may also contribute to our estimates being higher than previous reports. Our  
18  
19 250 study's estimates are recent, and rising incidence of pneumonia has been documented in all studies  
20  
21 251 that have reported such trends. [25-27]

22  
23  
24 252 Finally, this study included, in part, hospital-acquired pneumonias (HAP), which were excluded from  
25  
26 253 estimates calculated in some other studies (Table 4). The retrospective analysis may have included  
27  
28 254 more nosocomial infection than the prospective review, as the latter was focused on evaluation of  
29  
30 255 patients at admission for aLRTD and would not have reliably captured events that developed during  
31  
32 256 hospitalization. 25.3% pneumonia events included a nosocomial infection code, but this code could  
33  
34 257 relate to any nosocomial infection during that hospitalization. If all these cases were assumed to be  
35  
36 258 hospital-acquired pneumonia, our estimates community-acquired pneumonia incidence would still be  
37  
38 259 well above prior UK estimates: 441/100000 ( $\geq 18$  years).

39  
40  
41  
42  
43 260 While not impacting all-cause aLRTD incidence estimates discussed above, during the prospective  
44  
45 261 review, we found low rates of microbial investigation which prevented us from generating pathogen-  
46  
47 262 specific incidence estimates. Only 52% of patients with radiologically-confirmed pneumonia  
48  
49 263 underwent microbiological testing during hospitalization, with even lower rates in other aLRTD  
50  
51 264 subgroups (41% NP-LRTI and 14% HF). Microbiological testing occurred less frequently as age  
52  
53 265 increased, particularly in NP-LRTI patients. It is possible that, because aLRTD hospitalizations are  
54  
55 266 substantially more common among older persons, less etiologic investigation is performed.  
56  
57 267 Furthermore, clinicians may elect to treat elderly patients with a more pragmatic and less invasive  
58  
59  
60

1  
2  
3 268 approach. Management guidelines do not require specific pathogen identification to inform treatment  
4  
5 269 choice. Presence only of atypical features on presentation (in this series, 13% NP-LRTI and 11%  
6  
7 270 pneumonia cases) may also reduce the likelihood of timely microbiological testing. Low rates of  
8  
9 271 microbiological testing, and consequently of confirmed microbiological diagnosis, may represent a  
10  
11 272 source of underestimation of pathogen-specific disease incidence in patient groups (i.e., testing bias),  
12  
13 273 particularly in elderly patient groups.  
14  
15  
16

17 274

### 20 275 *Strengths and Limitations of This Study*

22  
23 276 This study has many strengths. First, this study used two analytical methods at the same site over a  
24  
25 277 comparable period, to calculate incidence using both prospective and retrospective approaches.  
26  
27 278 Second, the case burden of aLRTD and its subgroups was pre-defined and included patients with  
28  
29 279 atypical presentations but with clinical and/or radiological diagnoses, who may otherwise have been  
30  
31 280 excluded from analysis. Additionally, we calculated incidence using a denominator derived from GP  
32  
33 281 records, providing increased accuracy compared to population calculations based on census data.  
34  
35  
36 282 However, the study also had some limitations. This was a single-center study, with a predominantly  
37  
38 283 Caucasian cohort; therefore, the findings might not be generalizable to other populations both within  
39  
40 284 the UK and in other countries. Different healthcare systems may affect patient treatment preference,  
41  
42 285 and as the NHS provides care which is free at the point of access, the hospitalization rates seen in this  
43  
44 286 study may be different in fee or insurance based healthcare system. Similarly, physician treatment  
45  
46 287 preferences may affect hospitalization rates, and we have not explored these in this analysis. The ICD-  
47  
48 288 10 coding data analysis was limited to codes within the first five positions, and therefore may have  
49  
50 289 excluded some cases where other diagnoses were placed higher in the diagnostic coding hierarchy.  
51  
52 290 Furthermore, we could not determine how many cases of the 28.1% ICD-10 cases also coded with  
53  
54 291 nosocomial infection had hospital-acquired respiratory infection rather than other nosocomial  
55  
56 292 infections.  
57  
58  
59  
60

1  
2  
3 293 Although the denominator used to calculate incidence was derived from GP records, this was still an  
4  
5 294 estimate as there is no precisely defined denominator hospital catchment. We were unable to exclude  
6  
7 295 patients from outside the local CCGs in the retrospective analysis, due to the way ICD-10 data was  
8  
9 296 obtained. However, these patients were excluded from the prospective review and the incidence  
10  
11 297 calculated was comparable, suggesting any effect that patients attending North Bristol NHS Trust from  
12  
13 298 outside the local CCGs have on incidence estimates is minimal. This may be because any effect of  
14  
15 299 travelling or health-seeking behavior is bi-directional: whilst some patients admitted to Southmead  
16  
17 300 hospital were from outside the local area, it is also true that patients with aLRTD within the relevant  
18  
19 301 CCGs would have been admitted to other hospitals. We also acknowledge the 21-day prospective  
20  
21 302 review period was relatively short, not repeated and may not be fully representative of clinical practice  
22  
23 303 and cases throughout the year. This study was conducted before the emergence of COVID-19, and we  
24  
25 304 think these data will be useful in one of two ways in the context of COVID-19: (1) either COVID-19 will  
26  
27 305 become endemic, and the data will reflect the first year before a new normal, or (2) COVID-19 will  
28  
29 306 abate and it will provide an anchor for understanding incidence during a respiratory viral pandemic'  
30  
31  
32  
33  
34  
35  
36  
37

38 308 In conclusion, we found similarly high estimates of LRTD incidence using two different approaches,  
39  
40 309 and these estimates were higher than those obtained previously in the UK. Determining if there is a  
41  
42 310 real increase in incidence, or if this estimate is larger due to more accurate methodology including a  
43  
44 311 more accurate denominator will require ongoing comprehensive surveillance. Nonetheless,  
45  
46 312 combining all types of LRTD highlights the high burden for this important and potentially life-  
47  
48 313 threatening disease group. Incidence assessments require close assessments of potential areas of  
49  
50 314 under ascertainment, including unidentified or unenrolled cases in prospective studies, reduced  
51  
52 315 positions or number of ICD-10 codes included for retrospective studies, and population denominator  
53  
54 316 mismatch for all study types. Our prospective review findings highlight the need to consider atypical  
55  
56 317 clinical presentations for pneumonia and the lack of routine microbiological investigation in many  
57  
58  
59  
60

1  
2  
3 318 aLRTD patients required for pathogen-specific aLRTD incidence calculation. Future research should  
4  
5 319 include a fully prospective assessment of aLRTD incidence with comprehensive diagnostic testing  
6  
7 320 across multiple respiratory seasons, to ensure accurate capture of all aLRTD events, particularly in the  
8  
9 321 elderly. Such research should be undertaken given the high and rising aLRTD burden to enable  
10  
11 322 appropriate healthcare planning and identification of interventions which may reduce disease burden.  
12  
13  
14

15 323  
16  
17  
18  
19  
20  
21  
22  
23  
24  
25  
26  
27  
28  
29  
30  
31  
32  
33  
34  
35  
36  
37  
38  
39  
40  
41  
42  
43  
44  
45  
46  
47  
48  
49  
50  
51  
52  
53  
54  
55  
56  
57  
58  
59  
60

For peer review only

1  
2  
3 324 **Acknowledgements**  
4

5 325 We would like to acknowledge the assistance of Qi Yan, PhD (Pfizer, Inc.) who provided  
6  
7 326 indispensable medical writing and literature review support for this manuscript and Harvey Walsh  
8  
9 327 Health who performed the hospital denominator calculation used here. For the denominator  
10  
11 328 analysis, Hospital Episode Statistics (HES) Data were re-used with the permission of NHS Digital via  
12  
13 329 Harvey Walsh Limited.  
14  
15

16 330

17  
18 331 **Data Sharing**  
19

20 332 No additional data available  
21  
22  
23  
24  
25  
26  
27  
28  
29  
30  
31  
32  
33  
34  
35  
36  
37  
38  
39  
40  
41  
42  
43  
44  
45  
46  
47  
48  
49  
50  
51  
52  
53  
54  
55  
56  
57  
58  
59  
60

For peer review only

## References

1. Gibson, G.J., et al., *Respiratory health and disease in Europe: the new European Lung White Book*. Eur Respir J, 2013. **42**(3): p. 559-63.
2. Cilloniz, C., et al., *Impact of age and comorbidity on cause and outcome in community-acquired pneumonia*. Chest, 2013. **144**(3): p. 999-1007.
3. Torres, A., et al., *Burden of pneumococcal community-acquired pneumonia in adults across Europe: A literature review*. Respir Med, 2018. **137**: p. 6-13.
4. *European Lung White Book. Pneumonia*. April 25, 2021]; Available from: [https://www.erswhitebook.org/chapters/acute-lower-respiratory-infections/pneumonia/#:~:text=pneumonia%20\(VAP\).- ,Incidence,000%20cases%20are%20expected%20annually.](https://www.erswhitebook.org/chapters/acute-lower-respiratory-infections/pneumonia/#:~:text=pneumonia%20(VAP).- ,Incidence,000%20cases%20are%20expected%20annually.)
5. *British Lung Foundation. Pneumonia Statistics*. April 25, 2021]; Available from: <https://statistics.blf.org.uk/pneumonia>.
6. Lim, W. and H. Lawrence, *British Thoracic Society. National Audit Report: Adult Community Acquired Pneumonia Audit 2018-2019. National Audit Period: 1 December 2018 – 31 January 2019*. 2019.
7. Millett, E.R.C., et al., *Incidence of community-acquired lower respiratory tract infections and pneumonia among older adults in the United Kingdom: a population-based study*. PloS one, 2013. **8**(9): p. e75131-e75131.
8. Branche, A.R. and A.R. Falsey, *Respiratory Syncytial Virus Infection in Older Adults: An Under-Recognized Problem*. Drugs & Aging, 2015. **32**(4): p. 261-269.
9. Falsey, A.R. and E.E. Walsh, *Respiratory syncytial virus infection in elderly adults*. Drugs & aging, 2005. **22**(7): p. 577-587.
10. Maughan, B.C., et al., *False-negative chest radiographs in emergency department diagnosis of pneumonia*. R I Med J (2013), 2014. **97**(8): p. 20-3.
11. Self, W.H., et al., *High discordance of chest x-ray and computed tomography for detection of pulmonary opacities in ED patients: implications for diagnosing pneumonia*. Am J Emerg Med, 2013. **31**(2): p. 401-5.
12. Cilloniz, C., et al., *Microbial aetiology of community-acquired pneumonia and its relation to severity*. Thorax, 2011. **66**(4): p. 340-6.
13. Jain, S., et al., *Community-Acquired Pneumonia Requiring Hospitalization*. N Engl J Med, 2015. **373**(24): p. 2382.
14. Mainor, A.J., et al., *ICD-10 Coding Will Challenge Researchers: Caution and Collaboration may Reduce Measurement Error and Improve Comparability Over Time*. Med Care, 2019. **57**(7): p. e42-e46.
15. Burns, E.M., et al., *Systematic review of discharge coding accuracy*. J Public Health (Oxf), 2012. **34**(1): p. 138-48.
16. Henig, O. and K.S. Kaye, *Bacterial Pneumonia in Older Adults*. Infect Dis Clin North Am, 2017. **31**(4): p. 689-713.
17. Fine, M.J., et al., *Prognosis and outcomes of patients with community-acquired pneumonia. A meta-analysis*. JAMA, 1996. **275**(2): p. 134-41.
18. Campling, J., et al., *A novel approach to calculate disease incidence for hospital-based health events in England*. The Lancet, 2021. **398**: p. S30.
19. Chalmers, J., et al., *Community-acquired pneumonia in the United Kingdom: a call to action*. Pneumonia (Nathan), 2017. **9**: p. 15.
20. Shi, T., et al., *Global and Regional Burden of Hospital Admissions for Pneumonia in Older Adults: A Systematic Review and Meta-Analysis*. J Infect Dis, 2020. **222**(Suppl 7): p. S570-S576.
21. Lovering, A.M., et al., *Epidemiology and resource utilization for patients hospitalized for lower respiratory tract infection*. Clin Microbiol Infect, 2001. **7**(12): p. 666-70.

- 1  
2  
3 382 22. Yu, O., et al., *Classification algorithms to improve the accuracy of identifying patients*  
4 383 *hospitalized with community-acquired pneumonia using administrative data.* *Epidemiology*  
5 384 *and Infection*, 2011. **139**(9): p. 1296-1306.  
6 385 23. Uijl, A., et al., *Risk factors for incident heart failure in age- and sex-specific strata: a population-*  
7 386 *based cohort using linked electronic health records.* *Eur J Heart Fail*, 2019. **21**(10): p. 1197-  
8 387 1206.  
9 388 24. van de Garde, E.M.W., et al., *International classification of diseases codes showed modest*  
10 389 *sensitivity for detecting community-acquired pneumonia.* *Journal of Clinical Epidemiology*,  
11 390 2007. **60**(8): p. 834-838.  
12 391 25. Pick, H., et al., *Pneumococcal serotype trends, surveillance and risk factors in UK adult*  
13 392 *pneumonia, 2013–18.* *Thorax*, 2020. **75**(1): p. 38.  
14 393 26. Elston, J.W.T., et al., *Increasing incidence of invasive pneumococcal disease and pneumonia*  
15 394 *despite improved vaccination uptake: surveillance in Hull and East Yorkshire, UK, 2002–2009.*  
16 395 *Epidemiology and Infection*, 2012. **140**(7): p. 1252-1266.  
17 396 27. Thorryington, D., et al., *Elucidating the impact of the pneumococcal conjugate vaccine*  
18 397 *programme on pneumonia, sepsis and otitis media hospital admissions in England using a*  
19 398 *composite control.* *BMC Medicine*, 2018. **16**(1): p. 13.  
20  
21  
22  
23 399  
24  
25 400  
26  
27  
28  
29  
30  
31  
32  
33  
34  
35  
36  
37  
38  
39  
40  
41  
42  
43  
44  
45  
46  
47  
48  
49  
50  
51  
52  
53  
54  
55  
56  
57  
58  
59  
60



**Table 1: Demographic Characteristics of Patients admitted with aLRTD for 1 Year ICD-10 code Retrospective Analysis and 21-day Prospective Review****Period -- 2018–2019**

| Characteristic  | Pneumonia          |                        | NP-LRTI            |                        | Heart Failure      |                        | Other LRTD                | All LRTD           |                        |
|-----------------|--------------------|------------------------|--------------------|------------------------|--------------------|------------------------|---------------------------|--------------------|------------------------|
|                 | Prospective review | Retrospective analysis | Prospective review | Retrospective analysis | Prospective review | Retrospective analysis | Retrospective Review Only | Prospective review | Retrospective analysis |
| N               | 152                | 2402                   | 188                | 3005                   | 77                 | 1633                   | 1071                      | 410                | 7727                   |
| Gender, females | 61 (40)            | 1078 (45)              | 99 (53)            | 1482 (49)              | 39 (51)            | 731 (45)               | 489 (46)                  | 194 (47)           | 3780 (49)              |
| <b>Age</b>      |                    |                        |                    |                        |                    |                        |                           |                    |                        |
| Median (IQR), y | 80 (67-86)         | 81 (66-88)             | 70 (46-87)         | 69 (45-87)             | 87 (72-90)         | 87 (70-90)             | 74 (53-82)                | 80 (64-88)         | 81 (65-90)             |
| 18-24           | 4 (3)              | 72 (3)                 | 9 (5)              | 151 (5)                | 0 (0)              | 0 (0)                  | 26 (2)                    | 13 (3)             | 249 (3)                |
| 25-34           | 2 (2)              | 48 (2)                 | 12 (6)             | 183 (6)                | 0 (0)              | 3 (0)                  | 33 (3)                    | 14 (3)             | 267 (3)                |
| 35-44           | 6 (4)              | 97 (4)                 | 14 (7)             | 209 (7)                | 2 (3)              | 10 (1)                 | 59 (6)                    | 22 (5)             | 375 (5)                |
| 45-54           | 8 (5)              | 118 (5)                | 11 (6)             | 183 (6)                | 0 (0)              | 22 (1)                 | 112 (10)                  | 19 (5)             | 435 (6)                |
| 55-64           | 18 (12)            | 293 (12)               | 19 (10)            | 305 (10)               | 8 (10)             | 158 (10)               | 210 (20)                  | 45 (11)            | 966 (13)               |
| 65-74           | 34 (22)            | 501 (21)               | 32 (17)            | 549 (18)               | 10 (15)            | 199 (12)               | 223 (21)                  | 75 (18)            | 1472 (19)              |
| 75-84           | 44 (28)            | 667 (28)               | 40 (21)            | 621 (21)               | 20 (30)            | 498 (31)               | 205 (19)                  | 100 (24)           | 1991 (26)              |
| ≥85             | 38 (26)            | 606 (25)               | 51 (27)            | 704 (23)               | 37 (55)            | 742 (45)               | 203 (19)                  | 123 (30)           | 2255 (29)              |

**Table 2. Clinical Characteristics and Investigations of Patients admitted with aLRTD over 21-day Prospective Review Period in August-September 2020**

| Characteristic                                    | Pneumonia<br>n=152 (%) | NP-LRTI<br>n=188 (%) | Heart Failure<br>n=77 (%) | All LRTD<br>n=410 (%) |
|---------------------------------------------------|------------------------|----------------------|---------------------------|-----------------------|
| GP                                                | 56 (37)                | 72 (39)              | 30 (39)                   | 158 (39)              |
| A&E department                                    | 93 (61)                | 100 (54)             | 45 (58)                   | 238 (58)              |
| Transfer from another unit                        | 2 (1)                  | 13 (7)               | 0 (0)                     | 15 (4)                |
| Other                                             | 1 (1)                  | 1 (1)                | 2 (3)                     | 4 (1)                 |
| <b>Referral Source</b>                            |                        |                      |                           |                       |
| Typical features†                                 | 136 (89)               | 163 (87)             | 63 (82)                   | 355 (87)              |
| Atypical features                                 | 16 (11)                | 25 (13)              | 14 (18)                   | 55 (13)               |
| - collapse/falls                                  | 11 (7)                 | 12 (6)               | 0 (0)                     | 23 (6)                |
| - confusion                                       | 0 (0)                  | 7 (4)                | 4 (5)                     | 10 (2)                |
| - drowsiness                                      | 1 (1)                  | 1 (1)                | 2 (3)                     | 4 (1)                 |
| - off legs/generally unwell                       | 5 (3)                  | 5 (3)                | 8 (10)                    | 18 (4)                |
| <b>LRTD Signs and symptoms on referral to AMU</b> |                        |                      |                           |                       |
| Biochemistry                                      | 152 (100)              | 185 (99)             | 77 (100)                  | 419 (100)             |
| Haematology                                       | 152 (100)              | 185 (99)             | 77 (100)                  | 419 (100)             |
| Radiology                                         | 152 (100)              | 185 (99)             | 77 (100)                  | 419 (100)             |
| <b>Investigations Performed</b>                   |                        |                      |                           |                       |
| <i>Testing by Age Group</i>                       |                        |                      |                           |                       |
| All patients                                      | 79/152 (52)*           | 77/188 (41)          | 11/77 (14)                | 167 (41)              |
| 18-24                                             | 3/4 (75)               | 6/9 (66)             | 0/0 (0)                   | 9/13 (69)             |
| 25-34                                             | 0/0 (0)                | 6/12 (50)            | 0/0 (0)                   | 6/12 (50)             |
| 35-44                                             | 5/6 (83)               | 10/14 (71)           | 2/2 (100)                 | 17/22 (77)            |
| 45-54                                             | 6/8 (75)               | 6/11 (55)            | 0/0 (0)                   | 13/19 (68)            |
| 55-64                                             | 11/18 (61)             | 12/19 (63)           | 5/8 (63)                  | 31/45 (69)            |
| 65-74                                             | 15/34 (44)             | 12/32 (38)           | 1/10 (10)                 | 28/75 (37)            |
| 75-84                                             | 21/43 (49)             | 10/40 (25)           | 2/20 (10)                 | 33/100 (33)           |
| ≥85                                               | 18/39 (46)             | 15/51 (19)           | 1/37 (3)                  | 34/124 (27)           |
| <b>Test performed</b>                             |                        |                      |                           |                       |
| Blood culture                                     | 79 (52)                | 70 (37)              | 5 (6)                     | 150 (37)              |
| Urine culture                                     | 66 (43)                | 77 (41)              | 11 (14)                   | 150 (37)              |
| Sputum culture                                    | 27 (18)*               | 7 (4)                | 2 (3)                     | 35 (9)                |
| BinaxNOW® Pn UAT ‡                                | 29 (19)*               | 6 (3)                | 0 (0)                     | 35 (9)                |
| Respiratory virus PCR                             | 16 (11)*               | 11 (6)               | 1 (1)                     | 28 (7)                |
| Pleural fluid culture                             | 3 (2)                  | 0 (0)                | 1 (1)                     | 4 (1)                 |

A&E, Accident and Emergency department; GP, general practitioner; LRTD, lower respiratory tract disease; NP-LRTI, non-pneumonic lower respiratory tract infection; IQR, interquartile range; Pn UAT, pneumococcal urinary antigen test; PCR, polymerase chain reaction.

\*  $P < 0.05$ .

† Typical symptoms included cough, breathlessness, increased or discolored sputum production, wheeze, pleurisy, peripheral oedema, haemoptysis, reduced exercise tolerance and/or fever.

‡ BinaxNOW Pn UAT was only performed in accordance with NICE/BTS guidelines.

**Table 3: Incidence of aLRTD resulting in hospital admission based on prospective and retrospective approaches by age group and condition, North Bristol National Health Service Trust— United Kingdom 2018–2019.**

|                                                        | Age Groups |            |            |            |            |            |
|--------------------------------------------------------|------------|------------|------------|------------|------------|------------|
|                                                        | All Adults | 18-49 y    | 50-64 y    | 65-74 y    | 75-84 y    | ≥85 y      |
| <b>Population in 2018</b>                              | 406481     | 226920     | 91534      | 45705      | 29487      | 12835      |
| <b>Retrospective Analysis of a Year's ICD-10 codes</b> |            |            |            |            |            |            |
| <b>Annual cases – N (row %)</b>                        |            |            |            |            |            |            |
| All aLRTD                                              | 7,727      | 1,130 (14) | 1,103 (14) | 1,684 (22) | 2,053 (27) | 1,757 (23) |
| Pneumonia                                              | 2,402      | 264 (11)   | 288 (12)   | 589 (25)   | 720 (30)   | 541 (22)   |
| NP-LRTI                                                | 3,005      | 576 (19)   | 410 (14)   | 572 (19)   | 662 (22)   | 785 (26)   |
| Other LRTD                                             | 1,071      | 246 (23)   | 268 (25)   | 226 (21)   | 200 (19)   | 131 (12)   |
| Heart Failure                                          | 1,633      | 48 (3)     | 189 (12)   | 397 (24)   | 485 (30)   | 514 (31)   |
| <b>LRTI/Pneumonia Ratio</b>                            | 1.3        | 2.2        | 1.4        | 1.0        | 0.9        | 1.5        |
| <b>Incidence (per 100,000)</b>                         |            |            |            |            |            |            |
| All aLRTD                                              | 1,901      | 497        | 1,205      | 3,684      | 6,962      | 13,689     |
| Pneumonia                                              | 591        | 116        | 315        | 1,289      | 2,442      | 4,215      |
| NP-LRTI                                                | 739        | 254        | 448        | 1,252      | 2,245      | 6,116      |
| Other LRTD                                             | 263        | 108        | 293        | 494        | 678        | 1,021      |
| Heart Failure                                          | 402        | 21         | 206        | 869        | 1,645      | 4,005      |
| <b>21-day Prospective Review (annualized)</b>          |            |            |            |            |            |            |
| <b>Annualized cases – N (row %)</b>                    |            |            |            |            |            |            |
| All aLRTD                                              | 7,885      | 1,038      | 962        | 1,692      | 2,231      | 1,962      |
| Pneumonia                                              | 2,621      | 224        | 397        | 776        | 690        | 534        |
| NP-LRTI                                                | 3,857      | 796        | 531        | 653        | 1,061      | 816        |
| Heart Failure                                          | 2,000      | 51         | 205        | 308        | 641        | 795        |
| <b>LRTI/Pneumonia Ratio</b>                            | 1.5        | 3.6        | 1.3        | 0.8        | 1.5        | 1.5        |
| <b>Incidence (per 100,000)</b>                         |            |            |            |            |            |            |
| All aLRTD                                              | 1,940      | 458        | 1,050      | 3,703      | 7,565      | 15,283     |
| Pneumonia                                              | 645        | 99         | 433        | 1,698      | 2,339      | 4,164      |
| NP-LRTI                                                | 944        | 351        | 580        | 1,429      | 3,599      | 6,360      |
| Heart Failure                                          | 492        | 23         | 224        | 673        | 2,174      | 6,193      |

LRTI = lower respiratory tract infection; LRTD = lower respiratory tract disease.

Pneumonia category includes community and healthcare acquired. For retrospective ICD-10 based cohort, the following mutually exclusive hierarchy was used to define pneumonia, LRTI, and other LRTD; heart failure event could overlap with other categories.

“Other LRTD” contains LRTD events that could not definitively be placed in one of the other respiratory disease categories.

Table 4: Literature review of aLRTD incidence in hospitalized adults, United Kingdom

| Study                                | Study Years | Location (Facility)                            | Event Setting                   | Age   | Case Definition <sup>b</sup>                                                                                                                                                                                                                                                                                                                                                                            | Key inclusion                              | Denominator Source                                                                                                                                                                       | Overall Incidence       | Age Breakdown (years) | Incidence per 100,000 by age <sup>d</sup> | Comments                                                                                                                                                                                        |
|--------------------------------------|-------------|------------------------------------------------|---------------------------------|-------|---------------------------------------------------------------------------------------------------------------------------------------------------------------------------------------------------------------------------------------------------------------------------------------------------------------------------------------------------------------------------------------------------------|--------------------------------------------|------------------------------------------------------------------------------------------------------------------------------------------------------------------------------------------|-------------------------|-----------------------|-------------------------------------------|-------------------------------------------------------------------------------------------------------------------------------------------------------------------------------------------------|
| <b>Community –acquired Pneumonia</b> |             |                                                |                                 |       |                                                                                                                                                                                                                                                                                                                                                                                                         |                                            |                                                                                                                                                                                          |                         |                       |                                           |                                                                                                                                                                                                 |
| Current Study                        | 2018 – 2019 | Bristol (Southmead Hospital)                   | Inpatients only                 | ≥18 y | Clinical signs/symptoms with radiological change in keeping with infection (prospective review portion) <b>AND</b> Retrospective ICD-10 code analysis (1 <sup>st</sup> 5 positions): J12-J18, J85, and J86                                                                                                                                                                                              | Hospital-acquired pneumonia (HAP) included | Based on number of persons ≥18 years registered in referring GP practices. For practices with split referral patterns, number adjusted for percent of admissions that came to Southmead. | 648                     | 18 –49                | 116                                       | Retrospective analysis includes 1 <sup>st</sup> 5 positions                                                                                                                                     |
|                                      |             |                                                |                                 |       |                                                                                                                                                                                                                                                                                                                                                                                                         |                                            |                                                                                                                                                                                          |                         | 50 –64                | 315                                       |                                                                                                                                                                                                 |
|                                      |             |                                                |                                 |       |                                                                                                                                                                                                                                                                                                                                                                                                         |                                            |                                                                                                                                                                                          | 591                     | 65 –74                | 1,289                                     |                                                                                                                                                                                                 |
|                                      |             |                                                |                                 |       |                                                                                                                                                                                                                                                                                                                                                                                                         |                                            |                                                                                                                                                                                          |                         | 75 –84                | 2,442                                     |                                                                                                                                                                                                 |
|                                      |             |                                                |                                 |       |                                                                                                                                                                                                                                                                                                                                                                                                         |                                            |                                                                                                                                                                                          | ≥85                     | 4,215                 |                                           |                                                                                                                                                                                                 |
| Elston 2012, Epidemiol Infect        | 2002 – 2009 | Hull and East Yorkshire Hospitals <sup>c</sup> | Inpatients only                 | ≥16 y | ICD-10 codes (1 <sup>st</sup> position only): J18.0, J18.9, J13X, J18.1, and J15X                                                                                                                                                                                                                                                                                                                       | HAP included                               | Mid-year population estimates for Hull (city) and EroY (Surrounding County) from Office for National Statistics                                                                          | 143 (2002) – 207 (2009) | 15 –64                | 48.8 – 84.1                               | Fewer ICD-10 codes included than other analyses; Y95 Nosocomial infection included.                                                                                                             |
|                                      |             |                                                |                                 |       |                                                                                                                                                                                                                                                                                                                                                                                                         |                                            |                                                                                                                                                                                          | ≥65                     | 543 – 781             |                                           |                                                                                                                                                                                                 |
| Millet 2013, J Clin Epidemiol        | 1997 – 2011 | UK                                             | Both inpatients and outpatients | ≥65 y | Read and ICD 10 codes; no specified codes provided. For ICD-10, used first diagnosis code for first episode of hospitalization only.                                                                                                                                                                                                                                                                    | HAP Excluded                               | Mid-year UK population estimates from Office for National Statistics                                                                                                                     | 799                     | 65 –69                | 281                                       | Incidence estimates converted to per 100,000 person-years                                                                                                                                       |
|                                      |             |                                                |                                 |       |                                                                                                                                                                                                                                                                                                                                                                                                         |                                            |                                                                                                                                                                                          |                         | 70 –74                | 431                                       |                                                                                                                                                                                                 |
|                                      |             |                                                |                                 |       |                                                                                                                                                                                                                                                                                                                                                                                                         |                                            |                                                                                                                                                                                          |                         | 75 –79                | 694                                       |                                                                                                                                                                                                 |
|                                      |             |                                                |                                 |       |                                                                                                                                                                                                                                                                                                                                                                                                         |                                            |                                                                                                                                                                                          |                         | 80 –84 y              | 1,205                                     |                                                                                                                                                                                                 |
|                                      |             |                                                |                                 |       |                                                                                                                                                                                                                                                                                                                                                                                                         |                                            |                                                                                                                                                                                          |                         | 85 –89                | 2,184                                     |                                                                                                                                                                                                 |
|                                      |             |                                                |                                 |       |                                                                                                                                                                                                                                                                                                                                                                                                         |                                            |                                                                                                                                                                                          | ≥90                     | 4,194                 |                                           |                                                                                                                                                                                                 |
| Pick 2020, Thorax <sup>a</sup>       | 2013 – 2014 | Nottingham (2 large university hospitals)      | Inpatients only                 | ≥16 y | Inclusion criteria: one or more symptom suggestive of LRTI (defined as cough, increasing dyspnea, sputum production and fever), with evidence of acute infiltrates consistent with respiratory infection on admission radiography, and treated for a diagnosis of CAP Exclusion criteria: hospitalization within 10 days of index admission, a diagnosis of tuberculosis or post-obstructive pneumonia. | HAP Excluded                               | Mid-year estimates for the Greater Nottingham area from the Office for National Statistics, including local population data stratified by age group                                      | 96.3                    | 16 –49                | 27.3                                      | Only consented/enrolled subjects included in estimates Required CXR - confirmation but not all LRTI patients had CXR Census-derived denominator that may not have fully matched catchment area. |
|                                      |             |                                                |                                 |       |                                                                                                                                                                                                                                                                                                                                                                                                         |                                            |                                                                                                                                                                                          |                         | 50 –64                | 80.2                                      |                                                                                                                                                                                                 |
|                                      |             |                                                |                                 |       |                                                                                                                                                                                                                                                                                                                                                                                                         |                                            |                                                                                                                                                                                          |                         | 65 –74                | 181.3                                     |                                                                                                                                                                                                 |
|                                      |             |                                                |                                 |       |                                                                                                                                                                                                                                                                                                                                                                                                         |                                            |                                                                                                                                                                                          |                         | 75 –84                | 400.6                                     |                                                                                                                                                                                                 |
|                                      |             |                                                |                                 |       |                                                                                                                                                                                                                                                                                                                                                                                                         |                                            |                                                                                                                                                                                          |                         | ≥85                   | 707.5                                     |                                                                                                                                                                                                 |
|                                      | 2017 – 2018 |                                                |                                 |       |                                                                                                                                                                                                                                                                                                                                                                                                         |                                            |                                                                                                                                                                                          | 158.4                   | 16 –49                | 29.9                                      |                                                                                                                                                                                                 |
|                                      |             |                                                |                                 |       |                                                                                                                                                                                                                                                                                                                                                                                                         |                                            |                                                                                                                                                                                          |                         | 50 –64                | 146.9                                     |                                                                                                                                                                                                 |

|                                            |                        |                              |                 |       |                                                                                                                                                                                                                                                                                                                                                   |                                                           |                                                                                                                                                                                          |        |                                                  |                                              |                                                                                                                                    |  |
|--------------------------------------------|------------------------|------------------------------|-----------------|-------|---------------------------------------------------------------------------------------------------------------------------------------------------------------------------------------------------------------------------------------------------------------------------------------------------------------------------------------------------|-----------------------------------------------------------|------------------------------------------------------------------------------------------------------------------------------------------------------------------------------------------|--------|--------------------------------------------------|----------------------------------------------|------------------------------------------------------------------------------------------------------------------------------------|--|
|                                            |                        |                              |                 |       |                                                                                                                                                                                                                                                                                                                                                   |                                                           |                                                                                                                                                                                          | 120.4  | 65–74<br>75–84<br>≥85                            | 310.4<br>559.5<br>1522.6                     | Required specific symptoms and evidence of treatment and some CAP events may not have had this information documented              |  |
|                                            | 2013–2018              |                              |                 |       |                                                                                                                                                                                                                                                                                                                                                   |                                                           |                                                                                                                                                                                          | --     | --                                               | --                                           |                                                                                                                                    |  |
| Thorrington 2019, BMC Med                  | 2004–2005<br>2014–2015 | England                      | Inpatients only | ≥65 y | ICD 10 codes (1 <sup>st</sup> position only): J18 (pneumonia of unspecified causative organism)                                                                                                                                                                                                                                                   | HAP Included                                              | Mid-year population estimates for England for 2004 to 2015 from Office for National Statistics                                                                                           | NA     | ≥65                                              | 829                                          | Incidence is per 100,000 person-years. Fewer ICD-10 codes included than other analyses                                             |  |
|                                            |                        |                              |                 |       |                                                                                                                                                                                                                                                                                                                                                   |                                                           |                                                                                                                                                                                          |        | ≥65                                              | 1787                                         |                                                                                                                                    |  |
| Trotter 2008, EID                          | 1997–1998              | England                      | Inpatients only | ≥65 y | ICD 10 codes (1 <sup>st</sup> position only): J12–J18                                                                                                                                                                                                                                                                                             | HAP Included                                              | Mid-year population estimates for England for 1997 to 2004 from the Office for National Statistics                                                                                       | NA     | 65–74<br>75–84<br>≥85                            | 263<br>684<br>1599                           | Incidence estimates converted to 100,000 population                                                                                |  |
|                                            | 2004–2005              |                              |                 |       |                                                                                                                                                                                                                                                                                                                                                   |                                                           |                                                                                                                                                                                          |        | 65–74<br>75–84<br>≥85                            | 355<br>877<br>2218                           |                                                                                                                                    |  |
| <b>Lower Respiratory Tract Infection</b>   |                        |                              |                 |       |                                                                                                                                                                                                                                                                                                                                                   |                                                           |                                                                                                                                                                                          |        |                                                  |                                              |                                                                                                                                    |  |
| <b>Pneumonia</b>                           |                        |                              |                 |       |                                                                                                                                                                                                                                                                                                                                                   |                                                           |                                                                                                                                                                                          |        |                                                  |                                              |                                                                                                                                    |  |
| Current Study                              | 2018–2019              | Bristol (Southmead Hospital) | Inpatients only | ≥18 y | Clinical signs/symptoms of heart failure or elevated pro-NT BNP or radiological change<br><b>AND</b><br>Retrospective ICD-10 code analysis: J09, J10, J11; J20, J21, J22, J40, J41, J42, J44, J45, and J46                                                                                                                                        | Excludes all Pneumonia                                    | Based on number of persons ≥18 years registered in referring GP practices. For practices with split referral patterns, number adjusted for percent of admissions that came to Southmead. | 802    | 18–49<br>50–64<br>65–74                          | 254<br>448<br>1,252                          |                                                                                                                                    |  |
|                                            |                        |                              |                 |       |                                                                                                                                                                                                                                                                                                                                                   |                                                           |                                                                                                                                                                                          | 739    | 75–84<br>≥85                                     | 2,442<br>6,116                               |                                                                                                                                    |  |
| Lovering 2001, Clinical Micro. & Infection | 1994–1996              | Bristol (Southmead Hospital) | Inpatients only | ≥16 y | LRTI episodes from four groups by ICD 9/10 codes: (1) CAP; (2) chest infection or acute exacerbation in presence of asthma; (3) chest infection or acute exacerbation in presence of COPD; or (4) bronchitis with no radiological evidence of pneumonia or pre-existing respiratory disease, such as COPD or asthma. No specified codes provided. | Includes Community-acquired Pneumonia<br><br>HAP Excluded | No information on denominator provided                                                                                                                                                   | 623    | 16–39<br>40–49<br>50–59<br>60–69<br>70–79<br>>79 | 151<br>175<br>294<br>1,086<br>2,135<br>3,141 | Incidence converted to per 100,000 population<br>Study involved single hospital and no mention of source of denominator mentioned. |  |
| Millet                                     | 1997–                  | UK                           | Both            | ≥65 y | Read and ICD 10 codes; no specified                                                                                                                                                                                                                                                                                                               | Includes                                                  | Mid-year UK population                                                                                                                                                                   | 12,293 | 65–69                                            | 9,221                                        | Incidence                                                                                                                          |  |

1  
2  
3  
4  
5  
6  
7  
8  
9  
10  
11  
12  
13  
14  
15  
16  
17  
18  
19  
20  
21  
22  
23  
24  
25  
26  
27  
28  
29  
30  
31  
32  
33  
34  
35  
36  
37  
38  
39  
40  
41  
42  
43  
44  
45  
46

|                        |      |                            |                                                                                   |                              |                                                                                                                                                                                                                                                                                                     |                                         |                                                |                                       |
|------------------------|------|----------------------------|-----------------------------------------------------------------------------------|------------------------------|-----------------------------------------------------------------------------------------------------------------------------------------------------------------------------------------------------------------------------------------------------------------------------------------------------|-----------------------------------------|------------------------------------------------|---------------------------------------|
| 2013, J Clin Epidemiol | 2011 | inpatients and outpatients | codes provided. For ICD-10, used first diagnosis code for inpatient episode only. | Community-acquired Pneumonia | estimates from Office for National Statistics. (Patients were not considered at risk for community-acquired LRTI during an LRTI illness-episode, during a HES hospitalization, or for 14 days after any HES hospitalization or CPRD hospital code. This person-time was excluded from denominator.) | 70–74<br>75–79<br>80–84<br>85–89<br>≥90 | 10,740<br>12,607<br>15,137<br>18,791<br>26,287 | converted to per 100,000 person years |
|------------------------|------|----------------------------|-----------------------------------------------------------------------------------|------------------------------|-----------------------------------------------------------------------------------------------------------------------------------------------------------------------------------------------------------------------------------------------------------------------------------------------------|-----------------------------------------|------------------------------------------------|---------------------------------------|

| Heart Failure               |           |                              |                                 |       |                                                                                                                                                                                                                                                                                                                                                                                       |                                            |                                                                                                                                                                                          |              |                                                                  | All or First Episode                         |                                                                                                                                                              |  |
|-----------------------------|-----------|------------------------------|---------------------------------|-------|---------------------------------------------------------------------------------------------------------------------------------------------------------------------------------------------------------------------------------------------------------------------------------------------------------------------------------------------------------------------------------------|--------------------------------------------|------------------------------------------------------------------------------------------------------------------------------------------------------------------------------------------|--------------|------------------------------------------------------------------|----------------------------------------------|--------------------------------------------------------------------------------------------------------------------------------------------------------------|--|
| Current Study               | 2018-2019 | Bristol (Southmead Hospital) | Inpatients only                 | ≥18 y | Clinical signs/symptoms of heart failure or elevated pro-NT BNP or radiological change                                                                                                                                                                                                                                                                                                | All                                        | Based on number of persons ≥18 years registered in referring GP practices. For practices with split referral patterns, number adjusted for percent of admissions that came to Southmead. | 328          | 18–49<br>50–64<br>65–74<br>75–84<br>≥85                          | 21<br>206<br>869<br>1,645<br>4,005           |                                                                                                                                                              |  |
|                             |           |                              |                                 |       | <b>AND</b><br>Retrospective ICD-10 code analysis: I110; I130; I132; I50                                                                                                                                                                                                                                                                                                               |                                            |                                                                                                                                                                                          | 402          |                                                                  |                                              |                                                                                                                                                              |  |
| Uijl 2019, Eur J Heart Fail | 2000–2010 | UK                           | Both inpatients and outpatients | ≥55 y | 4 sources of HER were linked: CPRD primary care records, HES secondary care hospital charges, Myocardial Ischaemia National Audit Project (MINAP) disease registry, and ONS national death registry. HES ICD-10 codes: Heart failure: I110, I130, I132, I260, I50 and I21. Individuals were excluded if they presented a history of HF before their index date in CPRD, HES or MINAP. | First episode at 55 years or older counted | Not Reported                                                                                                                                                                             | Not Reported | 55–64, M<br>55–64, F<br>65–74, M<br>65–74, F<br>>75, M<br>>75, F | 360<br>190<br>1,360<br>920<br>3,440<br>2,800 | Incidence converted to per 100,000 person years<br>Included first episode of HF (inpatient or outpatient) at age 55 and up, so repeat episodes not included. |  |

<sup>a</sup> Only the most recent incidence estimates from the Nottingham CAP study were included.

<sup>b</sup> Add text names for all listed ICD codes in this footnote or appendix.

<sup>c</sup> Included hospitals were Hull Royal Infirmary, Castle Hill Hospital, Princess Royal Hospital, Scarborough District General Hospital, Bridlington & District Hospital, York Teaching Hospital, Scunthorpe General Hospital, Goole & District Hospital.

<sup>d</sup> For the current study, only age-group estimates from the retrospective analysis were included in this table, but these were closely comparable to the annualized incidence estimates based on the prospective review. See Table 3 for full results.

1  
2  
3 **Figure Legends:**  
4

5 **Figure 1: aLRTD admissions identified by Retrospective ICD-10 diagnostic code analysis at North**  
6  
7 **Bristol National Health Service Trust— United Kingdom 2018–2019.**  
8

9  
10 Monthly number of patients admitted, based on ICD-10 coding analysis, with (A) all acute Lower  
11  
12 Respiratory Tract Disease (aLRTD) (black bars), (B) Pneumonia (slashed bars), (C) Non-pneumonic  
13  
14 Lower Respiratory Tract Infection (NP-LRTI) (white bars), (D) Other LRTD (cross-hash bars), and (E)  
15  
16 Heart Failure (grey bars).  
17  
18  
19  
20

21 **Figure 2: Flow diagram of the Prospective Review**  
22  
23  
24  
25  
26  
27  
28  
29  
30  
31  
32  
33  
34  
35  
36  
37  
38  
39  
40  
41  
42  
43  
44  
45  
46  
47  
48  
49  
50  
51  
52  
53  
54  
55  
56  
57  
58  
59  
60

1  
2  
3  
4  
5  
6  
7  
8  
9  
10  
11  
12  
13  
14  
15  
16  
17  
18  
19  
20  
21  
22  
23  
24  
25  
26  
27  
28  
29  
30  
31  
32  
33  
34  
35  
36  
37  
38  
39  
40  
41  
42  
43  
44  
45  
46

For peer review only



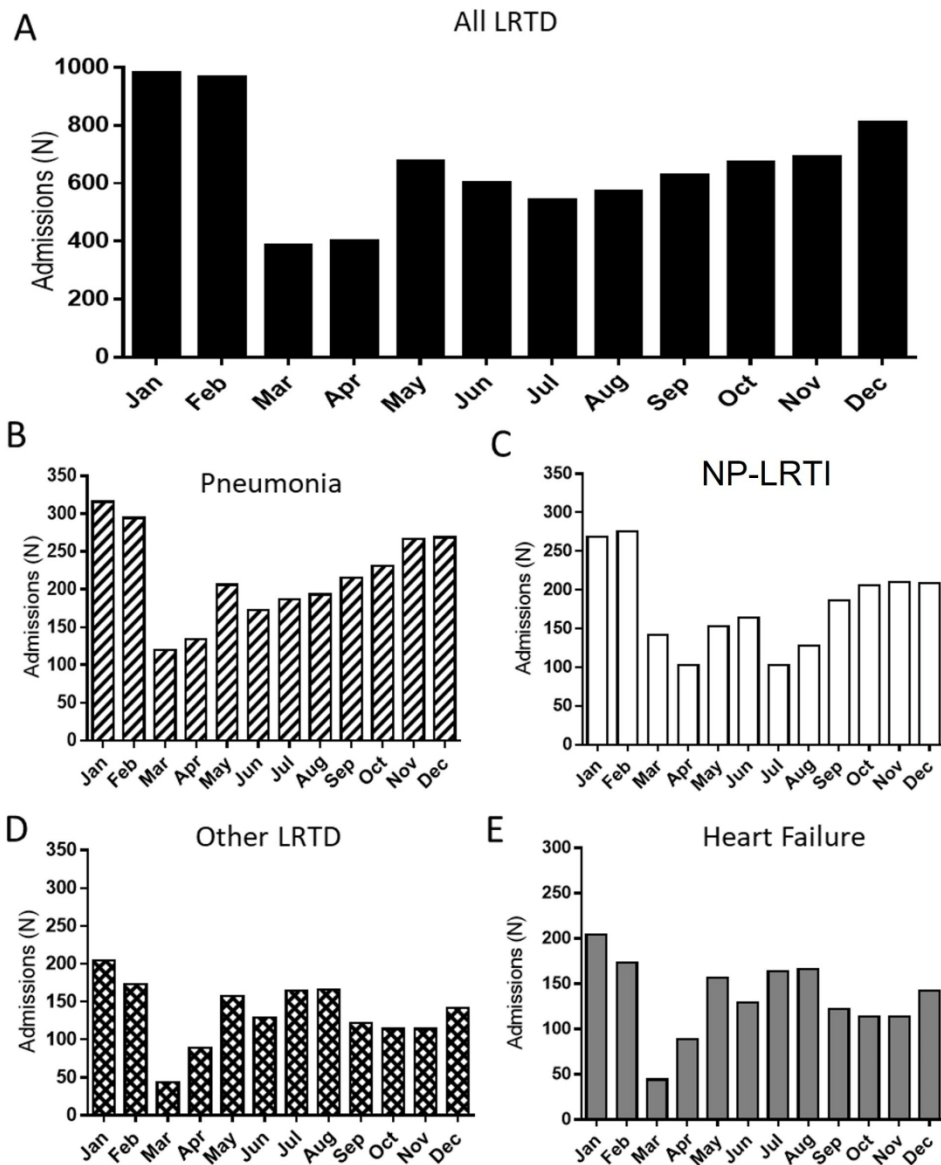

**Figure 1: aLRTD admissions identified by Retrospective ICD-10 diagnostic code analysis at North Bristol National Health Service Trust— United Kingdom 2018–2019.** Monthly number of patients admitted, based on ICD-10 coding analysis, with (A) all acute Lower Respiratory Tract Disease (aLRTD) (black bars), (B) Pneumonia (slashed bars), (C) Non-pneumonic Lower Respiratory Tract Infection (NP-LRTI) (white bars), (D) Other LRTD (cross-hatch bars), and (E) Heart Failure (grey bars).

169x207mm (300 x 300 DPI)

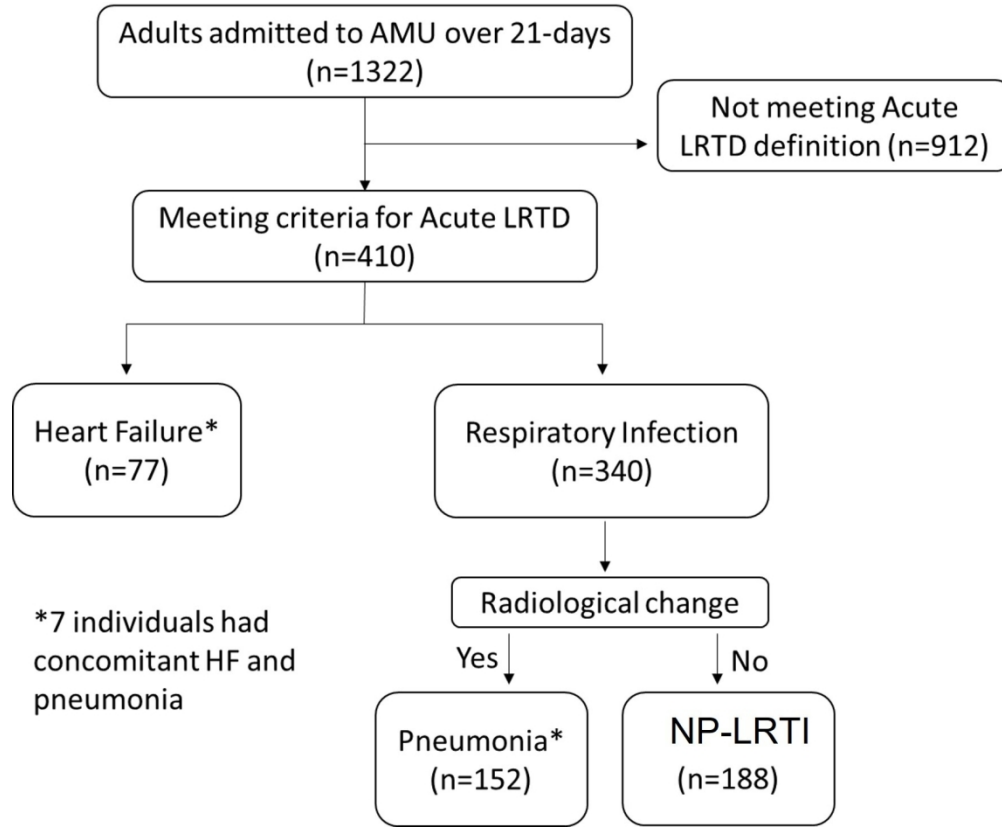

**Figure 2: Flow diagram of the Prospective Review**

149x123mm (300 x 300 DPI)

**Supplementary Data 1: ICD-10 codes used for patient identification for Retrospective Analysis**

| ICD-10 code | Definition                                                            | Pneumonia | NP-LRTI    | HF | Other aLRTD |
|-------------|-----------------------------------------------------------------------|-----------|------------|----|-------------|
| J09         | Influenza due to identified zoonotic or pandemic influenza virus      |           | X          |    |             |
| J10         | Influenza due to identified seasonal influenza virus                  |           | X          |    |             |
| J11         | Influenza, virus not identified                                       |           | X          |    |             |
| J12         | Viral pneumonia, not elsewhere classified                             | X         |            |    |             |
| J13         | Pneumonia due to <i>Streptococcus pneumoniae</i>                      | X         |            |    |             |
| J14         | Pneumonia due to <i>Haemophilus influenzae</i>                        | X         |            |    |             |
| J15         | Bacterial pneumonia, not elsewhere classified                         | X         |            |    |             |
| J16         | Pneumonia due to other infectious organisms, not elsewhere classified | X         |            |    |             |
| J17         | Pneumonia in diseases classified elsewhere                            | X         |            |    |             |
| J18         | Pneumonia, organism unspecified                                       | X         |            |    |             |
| J20         | Acute bronchitis                                                      |           | X          |    |             |
| J21         | Acute bronchiolitis                                                   |           | X          |    |             |
| J22         | Unspecified acute lower respiratory infection                         |           | X          |    |             |
| J40         | Bronchitis, not specified as acute or chronic                         |           | X          |    |             |
| J41         | Simple and mucopurulent chronic bronchitis                            |           | X          |    |             |
| J42         | Unspecified chronic bronchitis                                        |           | X          |    |             |
| J43         | Emphysema                                                             |           |            |    | X           |
| J44         | Other chronic obstructive pulmonary disease (including J44.0 chronic  |           | J44.0 only |    | X (J44.0)   |

|      |                                                                                                                                      |  |   |   |   |
|------|--------------------------------------------------------------------------------------------------------------------------------------|--|---|---|---|
|      | obstructive pulmonary disease with acute lower respiratory infection)                                                                |  |   |   |   |
| J45  | Asthma                                                                                                                               |  |   |   | X |
| J46  | Status asthmaticus                                                                                                                   |  |   |   | X |
| J47  | Bronchiectasis                                                                                                                       |  |   |   | X |
| J85  | Abscess of lung and mediastinum                                                                                                      |  | X |   |   |
| J86  | Pyothorax                                                                                                                            |  | X |   |   |
| J90  | Pleural effusion, not elsewhere classified                                                                                           |  |   |   | X |
| J91  | Pleural effusion in conditions classified elsewhere                                                                                  |  |   |   | X |
| J95  | Postprocedural respiratory disorders, not elsewhere classified                                                                       |  |   |   | X |
| J96  | Respiratory failure, not elsewhere classified                                                                                        |  |   |   | X |
| J98  | Other respiratory disorders                                                                                                          |  |   |   | X |
| J99  | Respiratory disorders in diseases classified elsewhere                                                                               |  |   |   | X |
| I110 | Hypertensive heart disease with heart failure                                                                                        |  |   | X |   |
| I130 | Hypertensive heart and chronic kidney disease with heart failure and stage 1 through stage 4 chronic kidney disease                  |  |   | X |   |
| I132 | Hypertensive heart and chronic kidney disease with heart failure and with stage 5 chronic kidney disease, or end stage renal disease |  |   | X |   |
| I50  | Heart failure                                                                                                                        |  |   | X |   |

## Supplementary Data 2: Case Definitions

| Condition                                                             | Definition                                                                                                                                                                                                                                                                                                                                                                                                                                                                                      | Reference                                                                                                                                                                                                                                                     |
|-----------------------------------------------------------------------|-------------------------------------------------------------------------------------------------------------------------------------------------------------------------------------------------------------------------------------------------------------------------------------------------------------------------------------------------------------------------------------------------------------------------------------------------------------------------------------------------|---------------------------------------------------------------------------------------------------------------------------------------------------------------------------------------------------------------------------------------------------------------|
| Acute Lower Respiratory Tract Disease (aLRTD)                         | <p>Acute lower respiratory tract disease (aLRTD) encompasses pneumonia, non-pneumonic lower respiratory tract infection (LRTI), acute bronchitis, exacerbation of underlying respiratory disease including asthma and chronic obstructive pulmonary disease (COPD), and cardiac failure with respiratory symptoms.</p> <p>Pneumothorax, pulmonary embolism, progression or new diagnosis of primary or secondary lung malignancy were excluded from aLRTD.</p>                                  |                                                                                                                                                                                                                                                               |
| Pneumonia                                                             | <p>Pneumonia was defined as infection affecting the airways (below the level of the larynx), with either:</p> <ol style="list-style-type: none"> <li>(1) an acute illness with radiographic shadowing which was at least segmental or present in more than one lobe and was not known to be previously present or due to other causes</li> <li>(2) in the absence of radiological investigation, clinical confirmation of pneumonic disease in the opinion of the treating physician</li> </ol> | Lim WS, Baudouin SV, George RC, <i>et al</i> ; Pneumonia Guidelines Committee of the BTS Standards of Care Committee. BTS guidelines for the management of community acquired pneumonia in adults: update 2009. <i>Thorax</i> . 2009 Oct;64 Suppl 3:iii 1-55. |
| Non-Radiologically Proven Lower Respiratory Tract Infection (NP-LRTI) | An infection that affects the airways (below the level of the larynx) including the trachea and alveoli, with neither the presence of radiological change nor a clinical diagnosis of pneumonia from the treating physician, i.e. non-pneumonic infection in the lungs.                                                                                                                                                                                                                         | Anderson W, Winter J. Managing LRTI in adults in the community. <i>Practitioner</i> . 2009 Nov;253(1723):21-5, 2-3. PMID: 20043506.                                                                                                                           |
| Cardiac/Heart Failure (HF)                                            | A clinical syndrome with symptoms and/or signs caused by a structural and/or functional cardiac abnormality and corroborated by elevated natriuretic peptide levels and or objective evidence of pulmonary or systemic congestion.                                                                                                                                                                                                                                                              | Bozkurt, Biykem et al. Universal Definition and Classification of Heart Failure. <i>Journal of Cardiac Failure</i> , Volume 27, Issue 4, 387 – 413.                                                                                                           |
| Other aLRTD                                                           | aLRTD which was neither pneumonia, NP-LRTI nor HF was classified as 'Other aLRTD'. This therefore includes non-infective exacerbations of chronic respiratory disease such as asthma, COPD and bronchiectasis                                                                                                                                                                                                                                                                                   |                                                                                                                                                                                                                                                               |

## STROBE Statement—checklist of items that should be included in reports of observational studies

|                              | Item No | Recommendation                                                                                                                                                                                                                                                                                                                                                                                                                                                         | Page No |
|------------------------------|---------|------------------------------------------------------------------------------------------------------------------------------------------------------------------------------------------------------------------------------------------------------------------------------------------------------------------------------------------------------------------------------------------------------------------------------------------------------------------------|---------|
| <b>Title and abstract</b>    | 1       | (a) Indicate the study's design with a commonly used term in the title or the abstract                                                                                                                                                                                                                                                                                                                                                                                 | 3       |
|                              |         | (b) Provide in the abstract an informative and balanced summary of what was done and what was found                                                                                                                                                                                                                                                                                                                                                                    | 3       |
| <b>Introduction</b>          |         |                                                                                                                                                                                                                                                                                                                                                                                                                                                                        |         |
| Background/rationale         | 2       | Explain the scientific background and rationale for the investigation being reported                                                                                                                                                                                                                                                                                                                                                                                   | 5-6     |
| Objectives                   | 3       | State specific objectives, including any prespecified hypotheses                                                                                                                                                                                                                                                                                                                                                                                                       | 6       |
| <b>Methods</b>               |         |                                                                                                                                                                                                                                                                                                                                                                                                                                                                        |         |
| Study design                 | 4       | Present key elements of study design early in the paper                                                                                                                                                                                                                                                                                                                                                                                                                | 7       |
| Setting                      | 5       | Describe the setting, locations, and relevant dates, including periods of recruitment, exposure, follow-up, and data collection                                                                                                                                                                                                                                                                                                                                        | 7-9     |
| Participants                 | 6       | (a) <i>Cohort study</i> —Give the eligibility criteria, and the sources and methods of selection of participants. Describe methods of follow-up<br><i>Case-control study</i> —Give the eligibility criteria, and the sources and methods of case ascertainment and control selection. Give the rationale for the choice of cases and controls<br><i>Cross-sectional study</i> —Give the eligibility criteria, and the sources and methods of selection of participants | 7-9     |
|                              |         | (b) <i>Cohort study</i> —For matched studies, give matching criteria and number of exposed and unexposed<br><i>Case-control study</i> —For matched studies, give matching criteria and the number of controls per case                                                                                                                                                                                                                                                 |         |
| Variables                    | 7       | Clearly define all outcomes, exposures, predictors, potential confounders, and effect modifiers. Give diagnostic criteria, if applicable                                                                                                                                                                                                                                                                                                                               | 8       |
| Data sources/<br>measurement | 8*      | For each variable of interest, give sources of data and details of methods of assessment (measurement). Describe comparability of assessment methods if there is more than one group                                                                                                                                                                                                                                                                                   | 7-8     |
| Bias                         | 9       | Describe any efforts to address potential sources of bias                                                                                                                                                                                                                                                                                                                                                                                                              | 15-16   |
| Study size                   | 10      | Explain how the study size was arrived at                                                                                                                                                                                                                                                                                                                                                                                                                              | 7-8     |
| Quantitative variables       | 11      | Explain how quantitative variables were handled in the analyses. If applicable, describe which groupings were chosen and why                                                                                                                                                                                                                                                                                                                                           | 8-9     |
| Statistical methods          | 12      | (a) Describe all statistical methods, including those used to control for confounding                                                                                                                                                                                                                                                                                                                                                                                  | 9       |
|                              |         | (b) Describe any methods used to examine subgroups and interactions                                                                                                                                                                                                                                                                                                                                                                                                    | NA      |
|                              |         | (c) Explain how missing data were addressed                                                                                                                                                                                                                                                                                                                                                                                                                            | NA      |
|                              |         | (d) <i>Cohort study</i> —If applicable, explain how loss to follow-up was addressed<br><i>Case-control study</i> —If applicable, explain how matching of cases and controls was addressed<br><i>Cross-sectional study</i> —If applicable, describe analytical methods taking account of sampling strategy                                                                                                                                                              | NA      |
|                              |         | (e) Describe any sensitivity analyses                                                                                                                                                                                                                                                                                                                                                                                                                                  | NA      |

Continued on next page

| <b>Results</b>           |     |                                                                                                                                                                                                              |              |
|--------------------------|-----|--------------------------------------------------------------------------------------------------------------------------------------------------------------------------------------------------------------|--------------|
| Participants             | 13* | (a) Report numbers of individuals at each stage of study—eg numbers potentially eligible, examined for eligibility, confirmed eligible, included in the study, completing follow-up, and analysed            | 10, 21-24    |
|                          |     | (b) Give reasons for non-participation at each stage                                                                                                                                                         | NA           |
|                          |     | (c) Consider use of a flow diagram                                                                                                                                                                           | 24           |
| Descriptive data         | 14* | (a) Give characteristics of study participants (eg demographic, clinical, social) and information on exposures and potential confounders                                                                     | 21-24        |
|                          |     | (b) Indicate number of participants with missing data for each variable of interest                                                                                                                          | NA           |
|                          |     | (c) <i>Cohort study</i> —Summarise follow-up time (eg, average and total amount)                                                                                                                             | NA           |
| Outcome data             | 15* | <i>Cohort study</i> —Report numbers of outcome events or summary measures over time                                                                                                                          | 10-11, 21-24 |
|                          |     | <i>Case-control study</i> —Report numbers in each exposure category, or summary measures of exposure                                                                                                         | NA           |
|                          |     | <i>Cross-sectional study</i> —Report numbers of outcome events or summary measures                                                                                                                           | NA           |
| Main results             | 16  | (a) Give unadjusted estimates and, if applicable, confounder-adjusted estimates and their precision (eg, 95% confidence interval). Make clear which confounders were adjusted for and why they were included | 11           |
|                          |     | (b) Report category boundaries when continuous variables were categorized                                                                                                                                    | NA           |
|                          |     | (c) If relevant, consider translating estimates of relative risk into absolute risk for a meaningful time period                                                                                             | NA           |
| Other analyses           | 17  | Report other analyses done—eg analyses of subgroups and interactions, and sensitivity analyses                                                                                                               | 10, 21-25    |
| <b>Discussion</b>        |     |                                                                                                                                                                                                              |              |
| Key results              | 18  | Summarise key results with reference to study objectives                                                                                                                                                     | 12           |
| Limitations              | 19  | Discuss limitations of the study, taking into account sources of potential bias or imprecision. Discuss both direction and magnitude of any potential bias                                                   | 15           |
| Interpretation           | 20  | Give a cautious overall interpretation of results considering objectives, limitations, multiplicity of analyses, results from similar studies, and other relevant evidence                                   | 12-16        |
| Generalisability         | 21  | Discuss the generalisability (external validity) of the study results                                                                                                                                        | 12-16        |
| <b>Other information</b> |     |                                                                                                                                                                                                              |              |
| Funding                  | 22  | Give the source of funding and the role of the funders for the present study and, if applicable, for the original study on which the present article is based                                                | 1            |

\*Give information separately for cases and controls in case-control studies and, if applicable, for exposed and unexposed groups in cohort and cross-sectional studies.

**Note:** An Explanation and Elaboration article discusses each checklist item and gives methodological background and published examples of transparent reporting. The STROBE checklist is best used in conjunction with this article (freely available on the Web sites of PLoS Medicine at <http://www.plosmedicine.org/>, Annals of Internal Medicine at <http://www.annals.org/>, and Epidemiology at <http://www.epidem.com/>). Information on the STROBE Initiative is available at [www.strobe-statement.org](http://www.strobe-statement.org).

# BMJ Open

## The incidence of acute lower respiratory tract disease hospitalizations, including pneumonia, among adults in Bristol, UK, 2019, estimated using both a prospective and retrospective methodology

|                                 |                                                                                                                                                                                                                                                                                                                                                                                                                                                                                                                                                               |
|---------------------------------|---------------------------------------------------------------------------------------------------------------------------------------------------------------------------------------------------------------------------------------------------------------------------------------------------------------------------------------------------------------------------------------------------------------------------------------------------------------------------------------------------------------------------------------------------------------|
| Journal:                        | <i>BMJ Open</i>                                                                                                                                                                                                                                                                                                                                                                                                                                                                                                                                               |
| Manuscript ID                   | bmjopen-2021-057464.R2                                                                                                                                                                                                                                                                                                                                                                                                                                                                                                                                        |
| Article Type:                   | Original research                                                                                                                                                                                                                                                                                                                                                                                                                                                                                                                                             |
| Date Submitted by the Author:   | 27-May-2022                                                                                                                                                                                                                                                                                                                                                                                                                                                                                                                                                   |
| Complete List of Authors:       | Hyams, Catherine; University of Bristol, Academic Respiratory Unit; University of Bristol, Bristol Vaccine Centre<br>Begier, Elizabeth; Pfizer Inc<br>Garcia Gonzalez, Maria; University of Bristol; Southmead Hospital, Academic Respiratory Unit<br>Southern, Jo; Pfizer Ltd<br>Campling, James; Pfizer Ltd<br>Gray, Sharon; Pfizer Inc<br>Oliver, Jennifer; University of Bristol, Schools of Cellular and Molecular Medicine and Population Health Sciences<br>Gessner, Bradford; Pfizer Inc<br>Finn, Adam; University of Bristol, Bristol Vaccine Centre |
| <b>Primary Subject Heading</b>: | Respiratory medicine                                                                                                                                                                                                                                                                                                                                                                                                                                                                                                                                          |
| Secondary Subject Heading:      | Infectious diseases, Epidemiology                                                                                                                                                                                                                                                                                                                                                                                                                                                                                                                             |
| Keywords:                       | Heart failure < CARDIOLOGY, Respiratory infections < THORACIC MEDICINE, Epidemiology < INFECTIOUS DISEASES                                                                                                                                                                                                                                                                                                                                                                                                                                                    |
|                                 |                                                                                                                                                                                                                                                                                                                                                                                                                                                                                                                                                               |

SCHOLARONE™  
Manuscripts





I, the Submitting Author has the right to grant and does grant on behalf of all authors of the Work (as defined in the below author licence), an exclusive licence and/or a non-exclusive licence for contributions from authors who are: i) UK Crown employees; ii) where BMJ has agreed a CC-BY licence shall apply, and/or iii) in accordance with the terms applicable for US Federal Government officers or employees acting as part of their official duties; on a worldwide, perpetual, irrevocable, royalty-free basis to BMJ Publishing Group Ltd ("BMJ") its licensees and where the relevant Journal is co-owned by BMJ to the co-owners of the Journal, to publish the Work in this journal and any other BMJ products and to exploit all rights, as set out in our [licence](#).

The Submitting Author accepts and understands that any supply made under these terms is made by BMJ to the Submitting Author unless you are acting as an employee on behalf of your employer or a postgraduate student of an affiliated institution which is paying any applicable article publishing charge ("APC") for Open Access articles. Where the Submitting Author wishes to make the Work available on an Open Access basis (and intends to pay the relevant APC), the terms of reuse of such Open Access shall be governed by a Creative Commons licence – details of these licences and which [Creative Commons](#) licence will apply to this Work are set out in our licence referred to above.

Other than as permitted in any relevant BMJ Author's Self Archiving Policies, I confirm this Work has not been accepted for publication elsewhere, is not being considered for publication elsewhere and does not duplicate material already published. I confirm all authors consent to publication of this Work and authorise the granting of this licence.

**Title:** The incidence of acute lower respiratory tract disease hospitalizations, including pneumonia, among adults in Bristol, UK, 2019, estimated using both a prospective and retrospective methodology

**Authors:** Catherine Hyams<sup>1,2,3</sup>, Elizabeth Begier<sup>4</sup>, Maria Garcia Gonzalez<sup>1,2</sup>, Jo Southern<sup>5</sup>, James Campling<sup>5</sup>, Sharon Gray<sup>4</sup>, Jennifer Oliver<sup>1</sup>, Bradford D. Gessner<sup>4</sup>, Adam Finn<sup>1</sup>

**Affiliations:**

<sup>1</sup> Bristol Vaccine Centre, Schools of Cellular and Molecular Medicine and Population Health Sciences, University of Bristol, Bristol, BS2 8AE, United Kingdom

<sup>2</sup> Academic Respiratory Unit, Learning and Research Building, Southmead Hospital, Bristol, UK, BS10 5NB

<sup>3</sup> Acute Medical Unit, Southmead Hospital, Bristol, UK, BS10 5NB

<sup>4</sup> Vaccines Medical Development, Scientific and Clinical Affairs, Pfizer Inc, Collegeville, PA, USA

<sup>5</sup> Vaccines Medical Affairs, Pfizer Ltd, Tadworth, UK, KT20 7NS

**Corresponding author:** Catherine Hyams, MBBS BSc(Hons) PhD  
Population Health Sciences, University of Bristol,  
Bristol, BS2 8AE,  
United Kingdom  
catherine.hyams@nbt.nhs.uk  
Catherine.hyams@bristol.ac.uk

**Alternate author:** Maria Garcia Gonzalez  
qa18884@bristol.ac.uk

**Running Title:** Incidence of acute lower respiratory tract disease in adults

**Keywords:** Pneumonia, respiratory infection, lower respiratory tract infection, heart failure

**Funding:** CH was funded by the National Institute for Health Research (NIHR) [NIHR Academic Clinical Fellowship (ACF-2015-25-002)]. The views expressed are those of the author(s) and not necessarily those of the NIHR or the

1  
2  
3 Department of Health and Social Care. The remainder of the study funding  
4  
5 was from Pfizer, Inc (WI255886-1).  
6  
7

8 **Competing Interests:** EB, JS, JC, SG, and BG are full time employees of Pfizer Vaccines and hold  
9  
10 stock or stock options. CH is Principal Investigator of the Avon CAP study  
11  
12 which is an investigator-led University of Bristol study funded by Pfizer and  
13  
14 has previously received support from the NIHR in an Academic Clinical  
15  
16 Fellowship. AF is a member of the Joint Committee on Vaccination and  
17  
18 Immunization (JCVI) and chair of the World Health Organization European  
19  
20 Technical Advisory Group of Experts on Immunization (ETAGE) committee. In  
21  
22 addition to receiving funding from Pfizer as Chief Investigator of this study,  
23  
24 he leads another project investigating transmission of respiratory bacteria in  
25  
26 families jointly funded by Pfizer and the Gates Foundation. The other  
27  
28 authors have no relevant conflicts of interest to declare.  
29  
30  
31  
32

33 **Word count:** 2997/4000  
34  
35  
36  
37

38 **Summary (38/40 words):** Using both retrospective and prospective methodologies, we found a high  
39  
40 annual incidence of acute lower respiratory disease (>1700 per 100000; 1.7%) in and around Bristol,  
41  
42 UK: pneumonia (~0.6%), lower respiratory tract infection without pneumonia (>0.7%), and heart  
43  
44 failure (>0.3%).  
45  
46  
47

48 **Author Contributions:** CH, EB, MGG, JS, BDG and AF generated the research questions and analysis  
49  
50 plan CH, EB, MGG, JS, JC, SG and BDG undertook and contributed to the data  
51  
52 analysis. AF oversaw the research and data collection which was undertaken by  
53  
54 CH and MGG. All authors contributed to the preparation of the manuscript.  
55  
56  
57  
58  
59  
60

## 1 **Abstract (278/300):**

### 2 **Objectives**

3 To determine the disease burden of acute lower respiratory tract disease (aLRTD) and its subsets  
4 (pneumonia, lower respiratory tract infection [LRTI], heart failure) in hospitalized adults in Bristol, UK.

### 5 **Setting**

6 Single-centre, secondary care hospital, Bristol UK

### 7 **Design**

8 We estimated aLRTD hospitalizations incidence in adults ( $\geq 18$  years) in Bristol, UK using two  
9 approaches. First, retrospective ICD-10 code analysis (first five positions/hospitalization) identified  
10 aLRTD events over a 12-month period (March2018–Feb2019). Secondly, during a 21-day prospective  
11 review (19Aug–9Sept2019), aLRTD admissions were identified, categorized by diagnosis, and  
12 subsequently annualized. Hospital catchment denominators were calculated using linked general  
13 practice and hospitalization data, with each practice's denominator contribution calculated based on  
14 practice population and percent of the practices' hospitalizations admitted to the study hospital.

### 15 **Participants**

16 Prospective review: 1322 adults screened; 410 identified with aLRTD. Retrospective review: 7727 adult  
17 admissions.

### 18 **Primary and Secondary outcome measures**

19 The incidence of aLRTD and its subsets in the adult population of Southmead Hospital, Bristol UK.

### 20 **Results**

21 Based on ICD-10 code analysis, annual incidences per 100000 population were: aLRTD, 1901;  
22 pneumonia, 591; LRTI, 739; heart failure, 402. aLRTD incidence was highest among those  $\geq 65$ -years:  
23 65–74 (3684 per 100000 adults), 75–84 (6962 per 100000 adults), and  $\geq 85$  (11430 per 100000 adults).

24 During the prospective review, 410/1322 (31%) hospitalized adults had aLRTD signs/symptoms, and  
25 annualized incidences closely replicated retrospective analysis results.

## 26 **Conclusions**

27 aLRTD disease burden was high, increasing sharply with age. aLRTD incidence is probably higher than  
28 estimated previously due to criteria specifying respiratory-specific symptoms or radiological change,  
29 usage of only the first diagnosis code, and mismatch between case count sources and population  
30 denominators. This may have significant consequences for healthcare planning, including usage of  
31 current and future vaccinations against respiratory infection.

## 34 ***Strengths and Limitations of This Study***

- 35 • We used two analytical methods at the same site over a comparable period, to calculate  
36 incidence using both prospective and retrospective approaches.
- 37 • The case burden of aLRTD and its subgroups was pre-defined and included patients with  
38 atypical presentations
- 39 • We calculated incidence using a denominator derived from GP records, providing increased  
40 accuracy compared to population calculations based on census data.
- 41 • This was a single-center study, with a predominantly Caucasian cohort; therefore, the findings  
42 might not be generalizable to other populations.
- 43 • The ICD-10 coding data analysis was limited to codes within the first five positions, and  
44 therefore may have excluded some cases where other diagnoses were placed higher in the  
45 diagnostic coding hierarchy.

## 47 Introduction

48 Acute lower respiratory tract disease (aLRTD) encompasses pneumonia, non-pneumonic lower  
49 respiratory tract infection (NP-LRTI), acute bronchitis, exacerbation of underlying respiratory diseases  
50 (including asthma and chronic obstructive pulmonary disease [COPD]), and acute heart failure (HF)  
51 events resulting in respiratory symptoms (e.g. breathlessness). Before the COVID-19 pandemic,  
52 European healthcare costs for pneumonia alone in adults were estimated at €10 billion annually,  
53 including €5.7 billion for inpatient care. [1] Pneumonia incidence in Europe varies by country and intra-  
54 country region, age, socioeconomic status, and gender; [2-4] however, in all studies pneumonia  
55 incidence in adults increases sharply with age. [3] Pneumonia affects an estimated 0.5% to 1% of UK  
56 adults each year [5, 6]. Overall LRTI incidence is considerably higher with ~15% of UK adults aged ≥65  
57 years experiencing an event each year.[7] Whilst HF is not typically clinically included as an acute  
58 respiratory illness, HF with respiratory symptoms may be caused by respiratory viral infection, such as  
59 respiratory syncytial virus (RSV), either acutely or 3-4 weeks after the primary infection [8, 9].

60  
61 However, aLRTD incidence may be considerably higher than previously reported, given that published  
62 literature has documented several reasons why previous estimates may have been erroneously low  
63 [1]. Estimates of aLRTD based on pneumonia defined as radiologically demonstrated alveolar  
64 infiltrates, may underestimate true disease burden as chest radiography (CXR) is an imperfect gold-  
65 standard. [10, 11] Immunosuppressed, elderly or dehydrated patients are likely to be under-  
66 represented if respiratory infection is defined by radiologically demonstrated changes. [10, 11]  
67 Microbiological investigations for pneumonia are undertaken variably and identify a causative  
68 pathogen in 50% of cases at most [12, 13]; hence, the disease is probably under-reported when  
69 confirmed microbiological diagnosis is required. Furthermore, Respiratory Syncytial Virus (RSV)  
70 infection has recently been recognized as an important respiratory pathogen later in life, [9] with  
71 severe disease occurring in patient groups in whom the diagnosis is likely to be under-recognized (e.g.

1  
2  
3 72 the elderly or those with underlying cardiac conditions). [8] Studies of clinical coding data are  
4  
5 73 retrospective and subject to recognized limitations associated with this methodology [14, 15]. Older  
6  
7 74 patients with pneumonia often have atypical presenting signs and symptoms, which may lead to  
8  
9 75 missed or incorrect admission diagnoses. [16] Pneumonia may occur secondary to, or be an underlying  
10  
11 76 cause of, the main presenting complaint, particularly in patients with cerebrovascular accidents (CVA),  
12  
13 77 HF, COPD exacerbations or altered consciousness levels. [17] In these scenarios, pneumonia may not  
14  
15 78 be the primary hospitalization diagnosis code and may not even be coded as an associated diagnosis.  
16  
17  
18  
19 79  
20  
21  
22 80 There are many studies examining the incidence of acute respiratory illness in children; however, data  
23  
24 81 on respiratory illness in adults in the UK is lacking. Given the paucity of data supporting accurate aLRTD  
25  
26 82 incidence rates and its disease subsets in adults, we undertook to assess aLRTD incidence by two  
27  
28 83 approaches (retrospective and prospective) in Bristol, UK, seeking to determine the disease burden of  
29  
30 84 hospitalized aLRTD and its subgroups more accurately.  
31  
32  
33  
34  
35  
36  
37  
38  
39  
40  
41  
42  
43  
44  
45  
46  
47  
48  
49  
50  
51  
52  
53  
54  
55  
56  
57  
58  
59  
60

## 86 **Methods**

### 87 *Study Design*

88 This study was conducted at a large secondary care institution in UK (North Bristol NHS Trust) with  
89 specialist Respiratory Services (interstitial lung disease, pleural disease). Two approaches were  
90 undertaken to estimate aLRTD incidence: (1) “retrospective analysis” of aLRTD International  
91 Classification of Diseases Tenth Revision (ICD-10) diagnostic codes for an entire year; and, (2) 21-day  
92 observational “prospective review” of aLRTD hospital admissions.

### 93 *Ethics*

94 This study was approved by North Bristol NHS Trust Research Audit Ethics Committee (CA52218). Data  
95 were anonymized before the authors accessed them for the purpose of this study.

### 96 *Patient and Public Involvement*

97 No patient involved.

### 98 *Retrospective Analysis*

99 For the retrospective analysis, all adult inpatient admissions ( $\geq 18$  years) obtained from Hospital  
100 Episode Statistic (HES) to the study hospital during March 2018–February 2019 with aLRTD ICD-10  
101 diagnostic codes (Supplementary data 1) in any of the first 5 positions were identified and categorized  
102 into aLRTD subgroups: pneumonia, NP-LRTI, other LRTD, and HF (Supplementary data 2). A mutually  
103 exclusive hierarchy was used (pneumonia, NP-LRTI, then other LRTD) although HF diagnoses could co-  
104 occur with other categories. “Other LRTD” included acute respiratory events that could not definitively  
105 be placed in another category. Only the first 5 ICD-10 codes were available for analysis.

### 106 *Prospective Review*

107 Adult patients ( $\geq 18$  years) resident within Bristol, North Somerset, and South Gloucestershire Clinical  
108 Commissioning Group (CCG) referred to the Acute Medical Unit (AMU) at North Bristol NHS Trust



1  
2  
3 109 during 19<sup>th</sup> August –9<sup>th</sup> September 2019 were included in an audit on acute respiratory illness. This  
4  
5 110 time period was selected because it was felt to represent a period when there were an average  
6  
7 111 number of adults hospitalised with aLRTD. A respiratory physician (CH) reviewed presenting features  
8  
9 112 and investigation results for each admitted patient to determine whether aLRTD was present. Further  
10  
11 113 medical record review was undertaken if patients had: new/worsening breathlessness, cough or  
12  
13 114 sputum production; new or worsening peripheral oedema; pleurisy; clinical examination findings  
14  
15 115 consistent with respiratory infection or HF; or fever attributable to suspected respiratory infection.  
16  
17 116 Patients with non-respiratory diagnoses were excluded. There were no patient refusals for either  
18  
19 117 approach.  
20  
21  
22  
23

#### 24 118 *Prospective Review Outcome measures*

25  
26  
27 119 aLRTD was considered confirmed in individuals with: new/worsening respiratory symptoms, with or  
28  
29 120 without fever; sepsis, delirium or raised inflammatory markers attributable to likely respiratory  
30  
31 121 infection in admitting clinical team's opinion; radiological change in keeping with infection (e.g.  
32  
33 122 consolidation); and/or final diagnosis of NP-LRTI, pneumonia or infective exacerbation of a chronic  
34  
35 123 respiratory condition. A pneumonia diagnosis was assigned if radiological changes likely due to  
36  
37 124 infection were described by the reporting radiologist. An NP-LRTI diagnosis was assigned if aLRTD signs  
38  
39 125 and symptoms likely to be due to infection were present without demonstrated radiological change.  
40  
41 126 A HF diagnosis was assigned in presence of: new/worsening breathlessness and bi-basal crepitations,  
42  
43 127 cardiac wheeze or new/worsening bilateral pitting oedema; elevated pro-NT BNP ( $\geq 450$ pg/mL);  
44  
45 128 radiologist-reported radiographic changes consistent with cardiac failure; or a final consultant  
46  
47 129 physician diagnosis of HF, cardiac failure or left-ventricular failure. When present,  $\geq 1$  diagnosis was  
48  
49 130 selected.  
50  
51  
52  
53

54 131 For both retrospective and prospective studies, pneumonia included both community and healthcare  
55  
56 132 setting acquired cases; although, the prospective review only captured admitting diagnoses and  
57  
58 133 pneumonias occurring later during hospitalization were not included.  
59  
60

1  
2  
3 134 *Incidence calculations*  
4  
5

6 135 Annual incidence per 100000 persons was calculated for both retrospective and prospective studies.  
7

8 136 Case counts from prospective review were annualized (i.e., case counts by diagnosis and overall were  
9

10 137 divided by the percentage of annual admissions for these diagnosis groups that occurred in this 21-  
11

12  
13 138 day period in the retrospective analysis).  
14

15  
16 139 *Incidence Denominators*  
17

18  
19 140 To calculate appropriate population denominators for incidence calculations, aLRTD hospital  
20

21 141 admission event data were linked to aggregated GP practice patient registration data within the NHS  
22

23 142 Bristol, North Somerset, and South Gloucestershire CCG for 2017–2019. Only 4% of patients sought  
24

25 143 care at North Bristol NHS Trust hospital from outside these local CCGs, despite presence of specialist  
26

27 144 respiratory services. In the UK, GP registration is available free of charge for all, regardless of  
28

29 145 residential status. For GP practices within these same CCGs, the proportion of their aLRTD admissions  
30

31 146 occurring at North Bristol NHS Trust was multiplied by their patient registration count in 2019 by age  
32

33 147 group, to get each practice's contribution to the denominator (e.g. if 50% aLRTD admissions were at  
34

35 148 North Bristol among persons 50–64 years, the practice would contribute half of their patients 50–64  
36

37 149 years to the denominator). Further details of this methodology have been described previously. [18]  
38

39  
40  
41 150  
42  
43

44 151 *Statistical analysis*  
45

46  
47 152 Patient characteristics were tabulated by aLRTD diagnosis. Categorical variables were presented as  
48

49 153 counts with percentages. Continuous data are presented with means and standard deviations (SD) if  
50

51 154 normally distributed and medians and interquartile range (IQR) if not normally distributed. Patient  
52

53 155 groups difference were evaluated using the Friedman test with Wilcoxon signed-rank test.  
54  
55  
56  
57  
58  
59  
60

## 157 **Results**

### 158 *Retrospective analysis*

159 Over a 12-month period, we identified 7727 hospital admissions for aLRTD: 3005 NP-LRTI admissions,  
160 2402 pneumonia, 1633 HF and 1071 other LRTD (Table 1). aLRTD admissions were lowest in March  
161 and April and highest December through February (Figure 1A), overall and for all aLRTD subgroups  
162 ( $P<0.05$ ) (Figure 1B-D). Overall, 28.1% (2244) cases were identified as being potentially hospital-  
163 acquired infection based on co-occurring ICD-10 code 'Y95 Nosocomial Infection'.

### 165 *Prospective review*

166 Among 1322 eligible adult patients referred to AMU over the 21-day review period (Figure 2), 410  
167 patients had signs or symptoms of aLRTD: 188 (46%) NP-LRTI; 152 (37%) pneumonia, and 77 (19%) HF.  
168 Seven patients had both decompensated HF and a respiratory infection at hospital admission. On  
169 admission, >10% of aLRTD patients did not have respiratory symptoms: 16 (11%) pneumonia, 25 (13%)  
170 NP-LRTI, and 18 (14%) HF (Table 2).

171 Almost all adults admitted with aLRTD underwent routine biochemistry, hematology, and radiological  
172 investigation (99.9%,  $n=409$ ). In contrast, only 150 (37%) patients with aLRTD had microbiological  
173 testing performed: blood cultures ( $n=149$ , 36%) and urine cultures ( $n=143$ , 35%). Pneumonia patients  
174 more commonly underwent microbiological investigation than NP-LRTI patients ( $P<0.05$ ) with highest  
175 disparity in rates of sputum culture, urinary antigens, and respiratory viral PCR (Table 2). All cardiac  
176 failure patients who underwent microbiological investigation had concomitant respiratory infection  
177 (Table 2). Overall, a microbiological diagnosis was found in 11 (3%) cases, highlighting the low  
178 frequency of definitive pathogen identification in aLRTD. Younger patients underwent microbiological  
179 testing more frequently than the elderly for all aLRTD categories (Table 2).

180

1  
2  
3 181 *Disease incidence*  
4  
5

6 182 Retrospective analysis yielded an overall aLRTD incidence of 1901 per 100000. Disease incidence rose  
7  
8 183 with increasing age (Table 3), both overall and for all disease subgroups; incidences per 100000 among  
9  
10 184 adults aged  $\geq 85$  years were: 11430 (aLRTD), 6116 (NP-LRTI), 4215 (pneumonia) and 4005 (HF). Overall,  
11  
12 185 28.1% aLRTD hospitalizations also included an ICD-10 discharge code for 'nosocomial infection',  
13  
14 186 suggesting the aLRTD event or other infection was hospital-acquired. For pneumonia 25.3% had the  
15  
16 187 nosocomial infection code. If all of these were related to the pneumonia diagnosis, an estimated  
17  
18 188 residual 1794 events would have been community-acquired pneumonia (annual incidence  
19  
20 189 441/100000 adults). Among older age categories, where the incidence of aLRTD was highest, NP-LRTI  
21  
22 190 incidence was similar to pneumonia incidence, with an approximate 1:1 ratio of NP-LRTI to pneumonia  
23  
24 191 cases. However, among adults under age 50 years, there were approximately twice as many NP-LRTI  
25  
26 192 cases observed as pneumonia cases. Incidence calculations using annualized prospective review  
27  
28 193 results were broadly comparable with retrospective analysis of ICD-10 data (Table 3).  
29  
30  
31  
32  
33  
34  
35  
36  
37  
38  
39  
40  
41  
42  
43  
44  
45  
46  
47  
48  
49  
50  
51  
52  
53  
54  
55  
56  
57  
58  
59  
60

1  
2  
3 194 **Discussion:**  
4

5 195 This is the first UK study to assess aLRTD incidence comprehensively. We conducted an analysis of 12-  
6  
7 196 months of hospital admissions by ICD-10 diagnosis code data and a 21-day prospective review at a  
8  
9 197 large academic hospital in southwest England. With both approaches, we found a high annual  
10  
11 198 incidence of aLRTD (>1700 per 100000; 1.7%), pneumonia (~0.6%), NP-LRTI without pneumonia  
12  
13 (>0.7%), and HF (>0.4%). Incidences increased sharply in a non-linear manner as age increased above  
14  
15 199 65 years for all aLRTD categories. These results suggest rates are probably significantly higher than  
16  
17 200 previous disease estimates from the UK (Table 4) but comparable with many results globally, [19, 20]  
18  
19 201 with important consequences for healthcare resources. For example, a recent review highlighted that  
20  
21 202 pneumonia incidences ranged from 1000 to 2500 per 100000 (1–2.5%) among persons aged 65–74  
22  
23 203 years in Spain, Germany, France, Japan and the US, which are comparable to the >1250 per 100000  
24  
25 204 (1.3%) reported here. Some of the potential sources of underestimation for other UK incidence studies  
26  
27 205 (Table 4) include: case source and denominator mismatch; use of first position in ICD-code analysis  
28  
29 206 only; inclusion of enrolled subjects in consent-based prospective studies only; requiring specific  
30  
31 207 symptoms and chest x-ray confirmation in order to be classified as pneumonia/aLRTD; and, lastly, the  
32  
33 208 rising incidence of aLRTD.  
34  
35 209  
36  
37  
38  
39  
40  
41

42 211 *Comparison with published literature*  
43  
44

45 212 No studies have reported aLRTD incidence comprehensively in UK hospitalized patients within the last  
46  
47 213 20 years. However, eight publications report incidence of  $\geq 1$  aLRTD subgroup. Seven publications  
48  
49 214 reported community-acquired pneumonia (CAP) incidence (three from Nottingham, UK). For  
50  
51 215 pneumonia, our incidence estimates were three to four-fold higher than other UK inpatient incidence  
52  
53 216 estimates (Table 4) but comparable to estimates from other countries. [19, 20] Only two UK studies  
54  
55 217 from approximately 20 years ago reported NP-LRTI incidence (one with both CAP and NP-LRTIs; Table  
56  
57 218 4), and only one provided an inpatient estimate. [21] NP-LRTI incidence was approximately 2-fold  
58  
59  
60

1  
2  
3 219 lower than that calculated here, taking into account inclusion of CAP and other NP-LRTI in their  
4  
5 220 estimates. [21, 22] The one UK study reporting HF incidence had methodological differences (i.e.,  
6  
7 221 inclusion of outpatients and limiting to initial HF diagnosis) and estimates could not be compared. [23]  
8  
9 222 Close examination of the existing literature methods yielded multiple sources for potential  
10  
11 223 underestimation.  
12  
13  
14

15 224 First, for incidence studies that were not countrywide, identifying an appropriate denominator is  
16  
17 225 challenging. Like many other inpatient settings worldwide, UK hospitals' catchment areas for acute  
18  
19 226 treatment are principally driven by geography, but the proportion of any area's residents expected to  
20  
21 227 use the hospital becomes less clear as distance from the hospital increases because catchment areas  
22  
23 228 and populations of different hospitals may overlap. Defining hospital catchment populations based  
24  
25 229 solely on census data cannot account for this variability. Including all geographic areas using the  
26  
27 230 hospital to any extent results in population denominator overestimation and underestimated  
28  
29 231 incidence. Here, we addressed this by calculating population denominators based on hospital  
30  
31 232 utilization behavior from referring General Practices.  
32  
33  
34

35 233 Second, other studies used fewer codes in their ICD code analysis: all limited their analyses to events  
36  
37 234 where the diagnostic code was in the first position (Table 4; case definition column), potentially  
38  
39 235 excluding admissions in which pneumonia/NP-LRTI complicated other underlying respiratory diseases,  
40  
41 236 including COPD and asthma. Limiting to first position has been shown to reduce sensitivity for  
42  
43 237 pneumonia events by about 30% (66%–72% sensitive). [22, 24] Conversely, the recent British Thoracic  
44  
45 238 Society (BTS) audit on CAP found ~27% of pneumonia events identified by ICD code (J12-18) had no  
46  
47 239 new CXR infiltrates. [6] Even accounting for this potential over coding practice, our estimates remain  
48  
49 240 well above other published UK estimates.  
50  
51  
52  
53

54 241 Third, for other prospective studies, exclusion of events where patients did not consent to  
55  
56 242 participation or were not identified by study surveillance processes (often conducted predominately  
57  
58 243 during business hours) can introduce underestimation. Further, other prospective pneumonia studies  
59  
60

1  
2  
3 244 specifically required documentation of specific symptoms, radiological findings, and treatments, [25]  
4  
5 245 potentially excluding those without these features documented in medical records. In our prospective  
6  
7 246 review, approximately 11% did not display typical signs and symptoms of pneumonia and could have  
8  
9 247 been excluded by that requirement. Requiring CXR confirmation has been shown to reduce incidence  
10  
11 248 estimates for pneumonia, [20] although all pneumonia events in our prospective review were  
12  
13 249 radiologically confirmed.  
14  
15  
16

17 250 Fourth, trends over time may also contribute to our estimates being higher than previous reports. Our  
18  
19 251 study's estimates are recent, and rising incidence of pneumonia has been documented in all studies  
20  
21 252 that have reported such trends. [25-27]  
22  
23

24 253 Finally, this study included, in part, hospital-acquired pneumonias (HAP), which were excluded from  
25  
26 254 estimates calculated in some other studies (Table 4). The retrospective analysis may have included  
27  
28 255 more nosocomial infection than the prospective review, as the latter was focused on evaluation of  
29  
30 256 patients at admission for aLRTD and would not have reliably captured events that developed during  
31  
32 257 hospitalization. 25.3% pneumonia events included a nosocomial infection code, but this code could  
33  
34 258 relate to any nosocomial infection during that hospitalization. If all these cases were assumed to be  
35  
36 259 hospital-acquired pneumonia, our estimates community-acquired pneumonia incidence would still be  
37  
38 260 well above prior UK estimates: 441/100000 ( $\geq 18$  years).  
39  
40  
41  
42

43 261 While not impacting all-cause aLRTD incidence estimates discussed above, during the prospective  
44  
45 262 review, we found low rates of microbial investigation which prevented us from generating pathogen-  
46  
47 263 specific incidence estimates. Only 52% of patients with radiologically-confirmed pneumonia  
48  
49 264 underwent microbiological testing during hospitalization, with even lower rates in other aLRTD  
50  
51 265 subgroups (41% NP-LRTI and 14% HF). Microbiological testing occurred less frequently as age  
52  
53 266 increased, particularly in NP-LRTI patients. It is possible that, because aLRTD hospitalizations are  
54  
55 267 substantially more common among older persons, less etiologic investigation is performed.  
56  
57 268 Furthermore, clinicians may elect to treat elderly patients with a more pragmatic and less invasive  
58  
59  
60

1  
2  
3 269 approach. Management guidelines do not require specific pathogen identification to inform treatment  
4  
5 270 choice. Presence only of atypical features on presentation (in this series, 13% NP-LRTI and 11%  
6  
7 271 pneumonia cases) may also reduce the likelihood of timely microbiological testing. Low rates of  
8  
9 272 microbiological testing, and consequently of confirmed microbiological diagnosis, may represent a  
10  
11 273 source of underestimation of pathogen-specific disease incidence in patient groups (i.e., testing bias),  
12  
13 274 particularly in elderly patient groups.  
14  
15  
16

17 275

### 20 276 *Strengths and Limitations of This Study*

23 277 This study has many strengths. First, this study used two analytical methods at the same site over a  
24  
25 278 comparable period, to calculate incidence using both prospective and retrospective approaches.  
26  
27 279 Second, the case burden of aLRTD and its subgroups was pre-defined and included patients with  
28  
29 280 atypical presentations but with clinical and/or radiological diagnoses, who may otherwise have been  
30  
31 281 excluded from analysis. Additionally, we calculated incidence using a denominator derived from GP  
32  
33 282 records, providing increased accuracy compared to population calculations based on census data.  
34  
35  
36

37 283 However, the study also had some limitations. This was a single-center study, with a predominantly  
38  
39 284 Caucasian cohort; therefore, the findings might not be generalizable to other populations both within  
40  
41 285 the UK and in other countries. Different healthcare systems may affect patient treatment preference,  
42  
43 286 and as the NHS provides care which is free at the point of access, the hospitalization rates seen in this  
44  
45 287 study may be different in fee or insurance based healthcare system. Similarly, physician treatment  
46  
47 288 preferences may affect hospitalization rates, and we have not explored these in this analysis. The ICD-  
48  
49 289 10 coding data analysis was limited to codes within the first five positions, and therefore may have  
50  
51 290 excluded some cases where other diagnoses were placed higher in the diagnostic coding hierarchy.  
52  
53 291 Furthermore, we could not determine how many cases of the 28.1% ICD-10 cases also coded with  
54  
55 292 nosocomial infection had hospital-acquired respiratory infection rather than other nosocomial  
56  
57 293 infections.  
58  
59  
60



1  
2  
3 294 Although the denominator used to calculate incidence was derived from GP records, this was still an  
4  
5 295 estimate as there is no precisely defined denominator hospital catchment. We were unable to exclude  
6  
7 296 patients from outside the local CCGs in the retrospective analysis, due to the way ICD-10 data was  
8  
9  
10 297 obtained. However, these patients were excluded from the prospective review and the incidence  
11  
12 298 calculated was comparable, suggesting any effect that patients attending North Bristol NHS Trust from  
13  
14 299 outside the local CCGs have on incidence estimates is minimal. This may be because any effect of  
15  
16 300 travelling or health-seeking behavior is bi-directional: whilst some patients admitted to Southmead  
17  
18 301 hospital were from outside the local area, it is also true that patients with aLRTD within the relevant  
19  
20 302 CCGs would have been admitted to other hospitals. We also acknowledge the 21-day prospective  
21  
22 303 review period was relatively short, not repeated and may not be fully representative of clinical practice  
23  
24 304 and cases throughout the year. This study was conducted before the emergence of COVID-19, and we  
25  
26 305 think these data will be useful in one of two ways in the context of COVID-19: (1) either COVID-19 will  
27  
28 306 become endemic, and the data will reflect the first year before a new normal, or (2) COVID-19 will  
29  
30 307 abate and it will provide an anchor for understanding incidence during a respiratory viral pandemic'  
31  
32  
33  
34  
35  
36  
37

38 309 In conclusion, we found similarly high estimates of LRTD incidence using two different approaches,  
39  
40 310 and these estimates were higher than those obtained previously in the UK. Determining if there is a  
41  
42 311 real increase in incidence, or if this estimate is larger due to more accurate methodology including a  
43  
44 312 more accurate denominator will require ongoing comprehensive surveillance. Nonetheless,  
45  
46 313 combining all types of LRTD highlights the high burden for this important and potentially life-  
47  
48 314 threatening disease group. Incidence assessments require close assessments of potential areas of  
49  
50 315 under ascertainment, including unidentified or unenrolled cases in prospective studies, reduced  
51  
52 316 positions or number of ICD-10 codes included for retrospective studies, and population denominator  
53  
54 317 mismatch for all study types. Our prospective review findings highlight the need to consider atypical  
55  
56 318 clinical presentations for pneumonia and the lack of routine microbiological investigation in many  
57  
58  
59  
60

1  
2  
3 319 aLRTD patients required for pathogen-specific aLRTD incidence calculation. Future research should  
4  
5 320 include a fully prospective assessment of aLRTD incidence with comprehensive diagnostic testing  
6  
7 321 across multiple respiratory seasons, to ensure accurate capture of all aLRTD events, particularly in the  
8  
9 322 elderly. Such research should be undertaken given the high and rising aLRTD burden to enable  
10  
11 323 appropriate healthcare planning and identification of interventions which may reduce disease burden.  
12  
13  
14

15 324  
16  
17  
18  
19  
20  
21  
22  
23  
24  
25  
26  
27  
28  
29  
30  
31  
32  
33  
34  
35  
36  
37  
38  
39  
40  
41  
42  
43  
44  
45  
46  
47  
48  
49  
50  
51  
52  
53  
54  
55  
56  
57  
58  
59  
60

For peer review only

1  
2  
3 325 **Acknowledgements**  
4

5 326 We would like to acknowledge the assistance of Qi Yan, PhD (Pfizer, Inc.) who provided  
6  
7 327 indispensable medical writing and literature review support for this manuscript and Harvey Walsh  
8  
9 328 Health who performed the hospital denominator calculation used here. For the denominator  
10  
11 329 analysis, Hospital Episode Statistics (HES) Data were re-used with the permission of NHS Digital via  
12  
13 330 Harvey Walsh Limited.  
14  
15

16 331

17  
18 332 **Data Sharing**  
19

20 333 No additional data available  
21  
22  
23  
24  
25  
26  
27  
28  
29  
30  
31  
32  
33  
34  
35  
36  
37  
38  
39  
40  
41  
42  
43  
44  
45  
46  
47  
48  
49  
50  
51  
52  
53  
54  
55  
56  
57  
58  
59  
60

For peer review only

## References

1. Gibson, G.J., et al., *Respiratory health and disease in Europe: the new European Lung White Book*. Eur Respir J, 2013. **42**(3): p. 559-63.
2. Cilloniz, C., et al., *Impact of age and comorbidity on cause and outcome in community-acquired pneumonia*. Chest, 2013. **144**(3): p. 999-1007.
3. Torres, A., et al., *Burden of pneumococcal community-acquired pneumonia in adults across Europe: A literature review*. Respir Med, 2018. **137**: p. 6-13.
4. *European Lung White Book. Pneumonia*. April 25, 2021]; Available from: [https://www.erswhitebook.org/chapters/acute-lower-respiratory-infections/pneumonia/#:~:text=pneumonia%20\(VAP\).- ,Incidence,000%20cases%20are%20expected%20annually.](https://www.erswhitebook.org/chapters/acute-lower-respiratory-infections/pneumonia/#:~:text=pneumonia%20(VAP).- ,Incidence,000%20cases%20are%20expected%20annually.)
5. *British Lung Foundation. Pneumonia Statistics*. April 25, 2021]; Available from: <https://statistics.blf.org.uk/pneumonia>.
6. Lim, W. and H. Lawrence, *British Thoracic Society. National Audit Report: Adult Community Acquired Pneumonia Audit 2018-2019. National Audit Period: 1 December 2018 – 31 January 2019*. 2019.
7. Millett, E.R.C., et al., *Incidence of community-acquired lower respiratory tract infections and pneumonia among older adults in the United Kingdom: a population-based study*. PloS one, 2013. **8**(9): p. e75131-e75131.
8. Branche, A.R. and A.R. Falsey, *Respiratory Syncytial Virus Infection in Older Adults: An Under-Recognized Problem*. Drugs & Aging, 2015. **32**(4): p. 261-269.
9. Falsey, A.R. and E.E. Walsh, *Respiratory syncytial virus infection in elderly adults*. Drugs & aging, 2005. **22**(7): p. 577-587.
10. Maughan, B.C., et al., *False-negative chest radiographs in emergency department diagnosis of pneumonia*. R I Med J (2013), 2014. **97**(8): p. 20-3.
11. Self, W.H., et al., *High discordance of chest x-ray and computed tomography for detection of pulmonary opacities in ED patients: implications for diagnosing pneumonia*. Am J Emerg Med, 2013. **31**(2): p. 401-5.
12. Cilloniz, C., et al., *Microbial aetiology of community-acquired pneumonia and its relation to severity*. Thorax, 2011. **66**(4): p. 340-6.
13. Jain, S., et al., *Community-Acquired Pneumonia Requiring Hospitalization*. N Engl J Med, 2015. **373**(24): p. 2382.
14. Mainor, A.J., et al., *ICD-10 Coding Will Challenge Researchers: Caution and Collaboration may Reduce Measurement Error and Improve Comparability Over Time*. Med Care, 2019. **57**(7): p. e42-e46.
15. Burns, E.M., et al., *Systematic review of discharge coding accuracy*. J Public Health (Oxf), 2012. **34**(1): p. 138-48.
16. Henig, O. and K.S. Kaye, *Bacterial Pneumonia in Older Adults*. Infect Dis Clin North Am, 2017. **31**(4): p. 689-713.
17. Fine, M.J., et al., *Prognosis and outcomes of patients with community-acquired pneumonia. A meta-analysis*. JAMA, 1996. **275**(2): p. 134-41.
18. Campling, J., et al., *A novel approach to calculate disease incidence for hospital-based health events in England*. The Lancet, 2021. **398**: p. S30.
19. Chalmers, J., et al., *Community-acquired pneumonia in the United Kingdom: a call to action*. Pneumonia (Nathan), 2017. **9**: p. 15.
20. Shi, T., et al., *Global and Regional Burden of Hospital Admissions for Pneumonia in Older Adults: A Systematic Review and Meta-Analysis*. J Infect Dis, 2020. **222**(Suppl 7): p. S570-S576.
21. Lovering, A.M., et al., *Epidemiology and resource utilization for patients hospitalized for lower respiratory tract infection*. Clin Microbiol Infect, 2001. **7**(12): p. 666-70.

- 1  
2  
3 383 22. Yu, O., et al., *Classification algorithms to improve the accuracy of identifying patients*  
4 384 *hospitalized with community-acquired pneumonia using administrative data*. *Epidemiology*  
5 385 *and Infection*, 2011. **139**(9): p. 1296-1306.  
6 386 23. Uijl, A., et al., *Risk factors for incident heart failure in age- and sex-specific strata: a population-*  
7 387 *based cohort using linked electronic health records*. *Eur J Heart Fail*, 2019. **21**(10): p. 1197-  
8 388 1206.  
9 389 24. van de Garde, E.M.W., et al., *International classification of diseases codes showed modest*  
10 390 *sensitivity for detecting community-acquired pneumonia*. *Journal of Clinical Epidemiology*,  
11 391 2007. **60**(8): p. 834-838.  
12 392 25. Pick, H., et al., *Pneumococcal serotype trends, surveillance and risk factors in UK adult*  
13 393 *pneumonia, 2013–18*. *Thorax*, 2020. **75**(1): p. 38.  
14 394 26. Elston, J.W.T., et al., *Increasing incidence of invasive pneumococcal disease and pneumonia*  
15 395 *despite improved vaccination uptake: surveillance in Hull and East Yorkshire, UK, 2002–2009*.  
16 396 *Epidemiology and Infection*, 2012. **140**(7): p. 1252-1266.  
17 397 27. Thorryington, D., et al., *Elucidating the impact of the pneumococcal conjugate vaccine*  
18 398 *programme on pneumonia, sepsis and otitis media hospital admissions in England using a*  
19 399 *composite control*. *BMC Medicine*, 2018. **16**(1): p. 13.

20  
21  
22  
23 40024  
25 401  
26  
27  
28  
29  
30  
31  
32  
33  
34  
35  
36  
37  
38  
39  
40  
41  
42  
43  
44  
45  
46  
47  
48  
49  
50  
51  
52  
53  
54  
55  
56  
57  
58  
59  
60

**Table 1: Demographic Characteristics of Patients admitted with aLRTD for 1 Year ICD-10 code Retrospective Analysis and 21-day Prospective Review****Period -- 2018–2019**

| Characteristic  | Pneumonia          |                        | NP-LRTI            |                        | Heart Failure      |                        | Other LRTD                | All LRTD           |                        |
|-----------------|--------------------|------------------------|--------------------|------------------------|--------------------|------------------------|---------------------------|--------------------|------------------------|
|                 | Prospective review | Retrospective analysis | Prospective review | Retrospective analysis | Prospective review | Retrospective analysis | Retrospective Review Only | Prospective review | Retrospective analysis |
| N               | 152                | 2402                   | 188                | 3005                   | 77                 | 1633                   | 1071                      | 410                | 7727                   |
| Gender, females | 61 (40)            | 1078 (45)              | 99 (53)            | 1482 (49)              | 39 (51)            | 731 (45)               | 489 (46)                  | 194 (47)           | 3780 (49)              |
| <b>Age</b>      |                    |                        |                    |                        |                    |                        |                           |                    |                        |
| Median (IQR), y | 80 (67-86)         | 81 (66-88)             | 70 (46-87)         | 69 (45-87)             | 87 (72-90)         | 87 (70-90)             | 74 (53-82)                | 80 (64-88)         | 81 (65-90)             |
| 18-24           | 4 (3)              | 72 (3)                 | 9 (5)              | 151 (5)                | 0 (0)              | 0 (0)                  | 26 (2)                    | 13 (3)             | 249 (3)                |
| 25-34           | 2 (2)              | 48 (2)                 | 12 (6)             | 183 (6)                | 0 (0)              | 3 (0)                  | 33 (3)                    | 14 (3)             | 267 (3)                |
| 35-44           | 6 (4)              | 97 (4)                 | 14 (7)             | 209 (7)                | 2 (3)              | 10 (1)                 | 59 (6)                    | 22 (5)             | 375 (5)                |
| 45-54           | 8 (5)              | 118 (5)                | 11 (6)             | 183 (6)                | 0 (0)              | 22 (1)                 | 112 (10)                  | 19 (5)             | 435 (6)                |
| 55-64           | 18 (12)            | 293 (12)               | 19 (10)            | 305 (10)               | 8 (10)             | 158 (10)               | 210 (20)                  | 45 (11)            | 966 (13)               |
| 65-74           | 34 (22)            | 501 (21)               | 32 (17)            | 549 (18)               | 10 (15)            | 199 (12)               | 223 (21)                  | 75 (18)            | 1472 (19)              |
| 75-84           | 44 (28)            | 667 (28)               | 40 (21)            | 621 (21)               | 20 (30)            | 498 (31)               | 205 (19)                  | 100 (24)           | 1991 (26)              |
| ≥85             | 38 (26)            | 606 (25)               | 51 (27)            | 704 (23)               | 37 (55)            | 742 (45)               | 203 (19)                  | 123 (30)           | 2255 (29)              |

**Table 2. Clinical Characteristics and Investigations of Patients admitted with aLRTD over 21-day Prospective Review Period in August-September 2020**

| Characteristic                                    | Pneumonia<br>n=152 (%) | NP-LRTI<br>n=188 (%) | Heart Failure<br>n=77 (%) | All LRTD<br>n=410 (%) |
|---------------------------------------------------|------------------------|----------------------|---------------------------|-----------------------|
| GP                                                | 56 (37)                | 72 (39)              | 30 (39)                   | 158 (39)              |
| A&E department                                    | 93 (61)                | 100 (54)             | 45 (58)                   | 238 (58)              |
| Transfer from another unit                        | 2 (1)                  | 13 (7)               | 0 (0)                     | 15 (4)                |
| Other                                             | 1 (1)                  | 1 (1)                | 2 (3)                     | 4 (1)                 |
| <b>Referral Source</b>                            |                        |                      |                           |                       |
| Typical features†                                 | 136 (89)               | 163 (87)             | 63 (82)                   | 355 (87)              |
| Atypical features                                 | 16 (11)                | 25 (13)              | 14 (18)                   | 55 (13)               |
| - collapse/falls                                  | 11 (7)                 | 12 (6)               | 0 (0)                     | 23 (6)                |
| - confusion                                       | 0 (0)                  | 7 (4)                | 4 (5)                     | 10 (2)                |
| - drowsiness                                      | 1 (1)                  | 1 (1)                | 2 (3)                     | 4 (1)                 |
| - off legs/generally unwell                       | 5 (3)                  | 5 (3)                | 8 (10)                    | 18 (4)                |
| <b>LRTD Signs and symptoms on referral to AMU</b> |                        |                      |                           |                       |
| Biochemistry                                      | 152 (100)              | 185 (99)             | 77 (100)                  | 419 (100)             |
| Haematology                                       | 152 (100)              | 185 (99)             | 77 (100)                  | 419 (100)             |
| Radiology                                         | 152 (100)              | 185 (99)             | 77 (100)                  | 419 (100)             |
| <b>Investigations Performed</b>                   |                        |                      |                           |                       |
| <i>Testing by Age Group</i>                       |                        |                      |                           |                       |
| All patients                                      | 79/152 (52)*           | 77/188 (41)          | 11/77 (14)                | 167 (41)              |
| 18-24                                             | 3/4 (75)               | 6/9 (66)             | 0/0 (0)                   | 9/13 (69)             |
| 25-34                                             | 0/0 (0)                | 6/12 (50)            | 0/0 (0)                   | 6/12 (50)             |
| 35-44                                             | 5/6 (83)               | 10/14 (71)           | 2/2 (100)                 | 17/22 (77)            |
| 45-54                                             | 6/8 (75)               | 6/11 (55)            | 0/0 (0)                   | 13/19 (68)            |
| 55-64                                             | 11/18 (61)             | 12/19 (63)           | 5/8 (63)                  | 31/45 (69)            |
| 65-74                                             | 15/34 (44)             | 12/32 (38)           | 1/10 (10)                 | 28/75 (37)            |
| 75-84                                             | 21/43 (49)             | 10/40 (25)           | 2/20 (10)                 | 33/100 (33)           |
| ≥85                                               | 18/39 (46)             | 15/51 (19)           | 1/37 (3)                  | 34/124 (27)           |
| <b>Test performed</b>                             |                        |                      |                           |                       |
| Blood culture                                     | 79 (52)                | 70 (37)              | 5 (6)                     | 150 (37)              |
| Urine culture                                     | 66 (43)                | 77 (41)              | 11 (14)                   | 150 (37)              |
| Sputum culture                                    | 27 (18)*               | 7 (4)                | 2 (3)                     | 35 (9)                |
| BinaxNOW® Pn UAT ‡                                | 29 (19)*               | 6 (3)                | 0 (0)                     | 35 (9)                |
| Respiratory virus PCR                             | 16 (11)*               | 11 (6)               | 1 (1)                     | 28 (7)                |
| Pleural fluid culture                             | 3 (2)                  | 0 (0)                | 1 (1)                     | 4 (1)                 |

A&E, Accident and Emergency department; GP, general practitioner; LRTD, lower respiratory tract disease; NP-LRTI, non-pneumonic lower respiratory tract infection; IQR, interquartile range; Pn UAT, pneumococcal urinary antigen test; PCR, polymerase chain reaction.

\*  $P < 0.05$ .

† Typical symptoms included cough, breathlessness, increased or discolored sputum production, wheeze, pleurisy, peripheral oedema, haemoptysis, reduced exercise tolerance and/or fever.

‡ BinaxNOW Pn UAT was only performed in accordance with NICE/BTS guidelines.

**Table 3: Incidence of aLRTD resulting in hospital admission based on prospective and retrospective approaches by age group and condition, North Bristol National Health Service Trust— United Kingdom 2018–2019.**

|                                                        | Age Groups |            |            |            |            |            |
|--------------------------------------------------------|------------|------------|------------|------------|------------|------------|
|                                                        | All Adults | 18-49 y    | 50-64 y    | 65-74 y    | 75-84 y    | ≥85 y      |
| <b>Population in 2018</b>                              | 406481     | 226920     | 91534      | 45705      | 29487      | 12835      |
| <b>Retrospective Analysis of a Year's ICD-10 codes</b> |            |            |            |            |            |            |
| <b>Annual cases – N (row %)</b>                        |            |            |            |            |            |            |
| All aLRTD                                              | 7,727      | 1,130 (14) | 1,103 (14) | 1,684 (22) | 2,053 (27) | 1,757 (23) |
| Pneumonia                                              | 2,402      | 264 (11)   | 288 (12)   | 589 (25)   | 720 (30)   | 541 (22)   |
| NP-LRTI                                                | 3,005      | 576 (19)   | 410 (14)   | 572 (19)   | 662 (22)   | 785 (26)   |
| Other LRTD                                             | 1,071      | 246 (23)   | 268 (25)   | 226 (21)   | 200 (19)   | 131 (12)   |
| Heart Failure                                          | 1,633      | 48 (3)     | 189 (12)   | 397 (24)   | 485 (30)   | 514 (31)   |
| <b>LRTI/Pneumonia Ratio</b>                            | 1.3        | 2.2        | 1.4        | 1.0        | 0.9        | 1.5        |
| <b>Incidence (per 100,000)</b>                         |            |            |            |            |            |            |
| All aLRTD                                              | 1,901      | 497        | 1,205      | 3,684      | 6,962      | 13,689     |
| Pneumonia                                              | 591        | 116        | 315        | 1,289      | 2,442      | 4,215      |
| NP-LRTI                                                | 739        | 254        | 448        | 1,252      | 2,245      | 6,116      |
| Other LRTD                                             | 263        | 108        | 293        | 494        | 678        | 1,021      |
| Heart Failure                                          | 402        | 21         | 206        | 869        | 1,645      | 4,005      |
| <b>21-day Prospective Review (annualized)</b>          |            |            |            |            |            |            |
| <b>Annualized cases – N (row %)</b>                    |            |            |            |            |            |            |
| All aLRTD                                              | 7,885      | 1,038      | 962        | 1,692      | 2,231      | 1,962      |
| Pneumonia                                              | 2,621      | 224        | 397        | 776        | 690        | 534        |
| NP-LRTI                                                | 3,857      | 796        | 531        | 653        | 1,061      | 816        |
| Heart Failure                                          | 2,000      | 51         | 205        | 308        | 641        | 795        |
| <b>LRTI/Pneumonia Ratio</b>                            | 1.5        | 3.6        | 1.3        | 0.8        | 1.5        | 1.5        |
| <b>Incidence (per 100,000)</b>                         |            |            |            |            |            |            |
| All aLRTD                                              | 1,940      | 458        | 1,050      | 3,703      | 7,565      | 15,283     |
| Pneumonia                                              | 645        | 99         | 433        | 1,698      | 2,339      | 4,164      |
| NP-LRTI                                                | 944        | 351        | 580        | 1,429      | 3,599      | 6,360      |
| Heart Failure                                          | 492        | 23         | 224        | 673        | 2,174      | 6,193      |

LRTI = lower respiratory tract infection; LRTD = lower respiratory tract disease.

Pneumonia category includes community and healthcare acquired. For retrospective ICD-10 based cohort, the following mutually exclusive hierarchy was used to define pneumonia, LRTI, and other LRTD; heart failure event could overlap with other categories.

"Other LRTD" contains LRTD events that could not definitively be placed in one of the other respiratory disease categories.



Table 4: Literature review of aLRTD incidence in hospitalized adults, United Kingdom

| Study                               | Study Years | Location (Facility)                            | Event Setting                   | Age   | Case Definition <sup>b</sup>                                                                                                                                                                                                                                                                                                                                                                            | Key inclusion                              | Denominator Source                                                                                                                                                                       | Overall Incidence       | Age Breakdown (years) | Incidence per 100,000 by age <sup>d</sup> | Comments                                                                                                                                                                                        |
|-------------------------------------|-------------|------------------------------------------------|---------------------------------|-------|---------------------------------------------------------------------------------------------------------------------------------------------------------------------------------------------------------------------------------------------------------------------------------------------------------------------------------------------------------------------------------------------------------|--------------------------------------------|------------------------------------------------------------------------------------------------------------------------------------------------------------------------------------------|-------------------------|-----------------------|-------------------------------------------|-------------------------------------------------------------------------------------------------------------------------------------------------------------------------------------------------|
| <b>Community-acquired Pneumonia</b> |             |                                                |                                 |       |                                                                                                                                                                                                                                                                                                                                                                                                         |                                            |                                                                                                                                                                                          |                         |                       |                                           |                                                                                                                                                                                                 |
| Current Study                       | 2018 – 2019 | Bristol (Southmead Hospital)                   | Inpatients only                 | ≥18 y | Clinical signs/symptoms with radiological change in keeping with infection (prospective review portion) <b>AND</b> Retrospective ICD-10 code analysis (1 <sup>st</sup> 5 positions): J12-J18, J85, and J86                                                                                                                                                                                              | Hospital-acquired pneumonia (HAP) included | Based on number of persons ≥18 years registered in referring GP practices. For practices with split referral patterns, number adjusted for percent of admissions that came to Southmead. | 648                     | 18 –49                | 116                                       | Retrospective analysis includes 1 <sup>st</sup> 5 positions                                                                                                                                     |
|                                     |             |                                                |                                 |       |                                                                                                                                                                                                                                                                                                                                                                                                         |                                            |                                                                                                                                                                                          |                         | 50 –64                | 315                                       |                                                                                                                                                                                                 |
|                                     |             |                                                |                                 |       |                                                                                                                                                                                                                                                                                                                                                                                                         |                                            |                                                                                                                                                                                          | 591                     | 65 –74                | 1,289                                     |                                                                                                                                                                                                 |
|                                     |             |                                                |                                 |       |                                                                                                                                                                                                                                                                                                                                                                                                         |                                            |                                                                                                                                                                                          |                         | 75 –84                | 2,442                                     |                                                                                                                                                                                                 |
|                                     |             |                                                |                                 |       |                                                                                                                                                                                                                                                                                                                                                                                                         |                                            |                                                                                                                                                                                          | ≥85                     | 4,215                 |                                           |                                                                                                                                                                                                 |
| Elston 2012, Epidemiol Infect       | 2002 – 2009 | Hull and East Yorkshire Hospitals <sup>c</sup> | Inpatients only                 | ≥16 y | ICD-10 codes (1 <sup>st</sup> position only): J18.0, J18.9, J13X, J18.1, and J15X                                                                                                                                                                                                                                                                                                                       | HAP included                               | Mid-year population estimates for Hull (city) and EroY (Surrounding County) from Office for National Statistics                                                                          | 143 (2002) – 207 (2009) | 15 –64                | 48.8 – 84.1                               | Fewer ICD-10 codes included than other analyses; Y95 Nosocomial infection included.                                                                                                             |
|                                     |             |                                                |                                 |       |                                                                                                                                                                                                                                                                                                                                                                                                         |                                            |                                                                                                                                                                                          | ≥65                     | 543 – 781             |                                           |                                                                                                                                                                                                 |
| Millet 2013, J Clin Epidemiol       | 1997 – 2011 | UK                                             | Both inpatients and outpatients | ≥65 y | Read and ICD 10 codes; no specified codes provided. For ICD-10, used first diagnosis code for first episode of hospitalization only.                                                                                                                                                                                                                                                                    | HAP Excluded                               | Mid-year UK population estimates from Office for National Statistics                                                                                                                     | 799                     | 65 –69                | 281                                       | Incidence estimates converted to per 100,000 person-years                                                                                                                                       |
|                                     |             |                                                |                                 |       |                                                                                                                                                                                                                                                                                                                                                                                                         |                                            |                                                                                                                                                                                          |                         | 70 –74                | 431                                       |                                                                                                                                                                                                 |
|                                     |             |                                                |                                 |       |                                                                                                                                                                                                                                                                                                                                                                                                         |                                            |                                                                                                                                                                                          |                         | 75 –79                | 694                                       |                                                                                                                                                                                                 |
|                                     |             |                                                |                                 |       |                                                                                                                                                                                                                                                                                                                                                                                                         |                                            |                                                                                                                                                                                          |                         | 80 –84 y              | 1,205                                     |                                                                                                                                                                                                 |
|                                     |             |                                                |                                 |       |                                                                                                                                                                                                                                                                                                                                                                                                         |                                            |                                                                                                                                                                                          |                         | 85 –89                | 2,184                                     |                                                                                                                                                                                                 |
|                                     |             |                                                |                                 |       |                                                                                                                                                                                                                                                                                                                                                                                                         |                                            |                                                                                                                                                                                          | ≥90                     | 4,194                 |                                           |                                                                                                                                                                                                 |
| Pick 2020, Thorax <sup>a</sup>      | 2013 – 2014 | Nottingham (2 large university hospitals)      | Inpatients only                 | ≥16 y | Inclusion criteria: one or more symptom suggestive of LRTI (defined as cough, increasing dyspnea, sputum production and fever), with evidence of acute infiltrates consistent with respiratory infection on admission radiography, and treated for a diagnosis of CAP Exclusion criteria: hospitalization within 10 days of index admission, a diagnosis of tuberculosis or post-obstructive pneumonia. | HAP Excluded                               | Mid-year estimates for the Greater Nottingham area from the Office for National Statistics, including local population data stratified by age group                                      | 96.3                    | 16 –49                | 27.3                                      | Only consented/enrolled subjects included in estimates Required CXR - confirmation but not all LRTI patients had CXR Census-derived denominator that may not have fully matched catchment area. |
|                                     |             |                                                |                                 |       |                                                                                                                                                                                                                                                                                                                                                                                                         |                                            |                                                                                                                                                                                          |                         | 50 –64                | 80.2                                      |                                                                                                                                                                                                 |
|                                     |             |                                                |                                 |       |                                                                                                                                                                                                                                                                                                                                                                                                         |                                            |                                                                                                                                                                                          | 65 –74                  | 181.3                 |                                           |                                                                                                                                                                                                 |
|                                     |             |                                                |                                 |       |                                                                                                                                                                                                                                                                                                                                                                                                         |                                            |                                                                                                                                                                                          | 75 –84                  | 400.6                 |                                           |                                                                                                                                                                                                 |
|                                     |             |                                                |                                 |       |                                                                                                                                                                                                                                                                                                                                                                                                         |                                            |                                                                                                                                                                                          | ≥85                     | 707.5                 |                                           |                                                                                                                                                                                                 |
|                                     | 2017 – 2018 |                                                |                                 |       |                                                                                                                                                                                                                                                                                                                                                                                                         |                                            |                                                                                                                                                                                          | 158.4                   | 16 –49                | 29.9                                      |                                                                                                                                                                                                 |
|                                     |             |                                                |                                 |       |                                                                                                                                                                                                                                                                                                                                                                                                         |                                            |                                                                                                                                                                                          |                         | 50 –64                | 146.9                                     |                                                                                                                                                                                                 |

|                                          |                        |                              |                 |       |                                                                                                                                                                                                                                                                                                                                                   |                                                           |                                                                                                                                                                                          |        |                                                  |                                              |                                                                                                                                    |
|------------------------------------------|------------------------|------------------------------|-----------------|-------|---------------------------------------------------------------------------------------------------------------------------------------------------------------------------------------------------------------------------------------------------------------------------------------------------------------------------------------------------|-----------------------------------------------------------|------------------------------------------------------------------------------------------------------------------------------------------------------------------------------------------|--------|--------------------------------------------------|----------------------------------------------|------------------------------------------------------------------------------------------------------------------------------------|
|                                          |                        |                              |                 |       |                                                                                                                                                                                                                                                                                                                                                   |                                                           |                                                                                                                                                                                          | 120.4  | 65–74<br>75–84<br>≥85                            | 310.4<br>559.5<br>1522.6                     | Required specific symptoms and evidence of treatment and some CAP events may not have had this information documented              |
|                                          | 2013–2018              |                              |                 |       |                                                                                                                                                                                                                                                                                                                                                   |                                                           |                                                                                                                                                                                          | --     | --                                               | --                                           |                                                                                                                                    |
| Thorrington 2019, BMC Med                | 2004–2005<br>2014–2015 | England                      | Inpatients only | ≥65 y | ICD 10 codes (1 <sup>st</sup> position only): J18 (pneumonia of unspecified causative organism)                                                                                                                                                                                                                                                   | HAP Included                                              | Mid-year population estimates for England for 2004 to 2015 from Office for National Statistics                                                                                           | NA     | ≥65                                              | 829                                          | Incidence is per 100,000 person-years. Fewer ICD-10 codes included than other analyses                                             |
|                                          |                        |                              |                 |       |                                                                                                                                                                                                                                                                                                                                                   |                                                           |                                                                                                                                                                                          |        | ≥65                                              | 1787                                         |                                                                                                                                    |
| Trotter 2008, EID                        | 1997–1998              | England                      | Inpatients only | ≥65 y | ICD 10 codes (1 <sup>st</sup> position only): J12–J18                                                                                                                                                                                                                                                                                             | HAP Included                                              | Mid-year population estimates for England for 1997 to 2004 from the Office for National Statistics                                                                                       | NA     | 65–74<br>75–84<br>≥85                            | 263<br>684<br>1599                           | Incidence estimates converted to 100,000 population                                                                                |
|                                          | 2004–2005              |                              |                 |       |                                                                                                                                                                                                                                                                                                                                                   |                                                           |                                                                                                                                                                                          |        | 65–74<br>75–84                                   | 355<br>877                                   |                                                                                                                                    |
|                                          |                        |                              |                 |       |                                                                                                                                                                                                                                                                                                                                                   |                                                           |                                                                                                                                                                                          |        | ≥85                                              | 2218                                         |                                                                                                                                    |
| <b>Lower Respiratory Tract Infection</b> |                        |                              |                 |       |                                                                                                                                                                                                                                                                                                                                                   | <b>Pneumonia</b>                                          |                                                                                                                                                                                          |        |                                                  |                                              |                                                                                                                                    |
| Current Study                            | 2018–2019              | Bristol (Southmead Hospital) | Inpatients only | ≥18 y | Clinical signs/symptoms of heart failure or elevated pro-NT BNP or radiological change<br><b>AND</b><br>Retrospective ICD-10 code analysis: J09, J10, J11; J20, J21, J22, J40, J41, J42, J44, J45, and J46                                                                                                                                        | Excludes all Pneumonia                                    | Based on number of persons ≥18 years registered in referring GP practices. For practices with split referral patterns, number adjusted for percent of admissions that came to Southmead. | 802    | 18–49<br>50–64<br>65–74                          | 254<br>448<br>1,252                          |                                                                                                                                    |
|                                          |                        |                              |                 |       |                                                                                                                                                                                                                                                                                                                                                   |                                                           |                                                                                                                                                                                          | 739    | 75–84<br>≥85                                     | 2,442<br>6,116                               |                                                                                                                                    |
| Loving 2001, Clinical Micro. & Infection | 1994–1996              | Bristol (Southmead Hospital) | Inpatients only | ≥16 y | LRTI episodes from four groups by ICD 9/10 codes: (1) CAP; (2) chest infection or acute exacerbation in presence of asthma; (3) chest infection or acute exacerbation in presence of COPD; or (4) bronchitis with no radiological evidence of pneumonia or pre-existing respiratory disease, such as COPD or asthma. No specified codes provided. | Includes Community-acquired Pneumonia<br><br>HAP Excluded | No information on denominator provided                                                                                                                                                   | 623    | 16–39<br>40–49<br>50–59<br>60–69<br>70–79<br>>79 | 151<br>175<br>294<br>1,086<br>2,135<br>3,141 | Incidence converted to per 100,000 population<br>Study involved single hospital and no mention of source of denominator mentioned. |
| Millet                                   | 1997–                  | UK                           | Both            | ≥65 y | Read and ICD 10 codes; no specified                                                                                                                                                                                                                                                                                                               | Includes                                                  | Mid-year UK population                                                                                                                                                                   | 12,293 | 65–69                                            | 9,221                                        | Incidence                                                                                                                          |

1  
2  
3  
4  
5  
6  
7  
8  
9  
10  
11  
12  
13  
14  
15  
16  
17  
18  
19  
20  
21  
22  
23  
24  
25  
26  
27  
28  
29  
30  
31  
32  
33  
34  
35  
36  
37  
38  
39  
40  
41  
42  
43  
44  
45  
46

|                        |      |                            |                                                                                   |                              |                                                                                                                                                                                                                                                                                                     |                                         |                                                |                                       |
|------------------------|------|----------------------------|-----------------------------------------------------------------------------------|------------------------------|-----------------------------------------------------------------------------------------------------------------------------------------------------------------------------------------------------------------------------------------------------------------------------------------------------|-----------------------------------------|------------------------------------------------|---------------------------------------|
| 2013, J Clin Epidemiol | 2011 | inpatients and outpatients | codes provided. For ICD-10, used first diagnosis code for inpatient episode only. | Community-acquired Pneumonia | estimates from Office for National Statistics. (Patients were not considered at risk for community-acquired LRTI during an LRTI illness-episode, during a HES hospitalization, or for 14 days after any HES hospitalization or CPRD hospital code. This person-time was excluded from denominator.) | 70–74<br>75–79<br>80–84<br>85–89<br>≥90 | 10,740<br>12,607<br>15,137<br>18,791<br>26,287 | converted to per 100,000 person years |
|------------------------|------|----------------------------|-----------------------------------------------------------------------------------|------------------------------|-----------------------------------------------------------------------------------------------------------------------------------------------------------------------------------------------------------------------------------------------------------------------------------------------------|-----------------------------------------|------------------------------------------------|---------------------------------------|

| Heart Failure               |             |                              |                                 |       |                                                                                                                                                                                                                                                                                                                                                                                       |                                            |                                                                                                                                                                                          |              |                                                                  |                                              | All or First Episode                                                                                                                                         |  |  |
|-----------------------------|-------------|------------------------------|---------------------------------|-------|---------------------------------------------------------------------------------------------------------------------------------------------------------------------------------------------------------------------------------------------------------------------------------------------------------------------------------------------------------------------------------------|--------------------------------------------|------------------------------------------------------------------------------------------------------------------------------------------------------------------------------------------|--------------|------------------------------------------------------------------|----------------------------------------------|--------------------------------------------------------------------------------------------------------------------------------------------------------------|--|--|
| Current Study               | 2018-2019   | Bristol (Southmead Hospital) | Inpatients only                 | ≥18 y | Clinical signs/symptoms of heart failure or elevated pro-NT BNP or radiological change                                                                                                                                                                                                                                                                                                | All                                        | Based on number of persons ≥18 years registered in referring GP practices. For practices with split referral patterns, number adjusted for percent of admissions that came to Southmead. | 328          | 18–49<br>50–64<br>65–74<br>75–84<br>≥85                          | 21<br>206<br>869<br>1,645<br>4,005           |                                                                                                                                                              |  |  |
|                             |             |                              |                                 |       | <b>AND</b><br>Retrospective ICD-10 code analysis: I110; I130; I132; I50                                                                                                                                                                                                                                                                                                               |                                            |                                                                                                                                                                                          | 402          |                                                                  |                                              |                                                                                                                                                              |  |  |
| Uijl 2019, Eur J Heart Fail | 2000 – 2010 | UK                           | Both inpatients and outpatients | ≥55 y | 4 sources of HER were linked: CPRD primary care records, HES secondary care hospital charges, Myocardial Ischaemia National Audit Project (MINAP) disease registry, and ONS national death registry. HES ICD-10 codes: Heart failure: I110, I130, I132, I260, I50 and I21. Individuals were excluded if they presented a history of HF before their index date in CPRD, HES or MINAP. | First episode at 55 years or older counted | Not Reported                                                                                                                                                                             | Not Reported | 55–64, M<br>55–64, F<br>65–74, M<br>65–74, F<br>>75, M<br>>75, F | 360<br>190<br>1,360<br>920<br>3,440<br>2,800 | Incidence converted to per 100,000 person years<br>Included first episode of HF (inpatient or outpatient) at age 55 and up, so repeat episodes not included. |  |  |

<sup>a</sup> Only the most recent incidence estimates from the Nottingham CAP study were included.

<sup>b</sup> Add text names for all listed ICD codes in this footnote or appendix.

<sup>c</sup> Included hospitals were Hull Royal Infirmary, Castle Hill Hospital, Princess Royal Hospital, Scarborough District General Hospital, Bridlington & District Hospital, York Teaching Hospital, Scunthorpe General Hospital, Goole & District Hospital.

<sup>d</sup> For the current study, only age-group estimates from the retrospective analysis were included in this table, but these were closely comparable to the annualized incidence estimates based on the prospective review. See Table 3 for full results.

1  
2  
3 **Figure Legends:**  
4

5 **Figure 1: aLRTD admissions identified by Retrospective ICD-10 diagnostic code analysis at North**  
6  
7  
8 **Bristol National Health Service Trust— United Kingdom 2018–2019.**

9  
10 Monthly number of patients admitted, based on ICD-10 coding analysis, with (A) all acute Lower  
11  
12 Respiratory Tract Disease (aLRTD) (black bars), (B) Pneumonia (slashed bars), (C) Non-pneumonic  
13  
14 Lower Respiratory Tract Infection (NP-LRTI) (white bars), (D) Other LRTD (cross-hash bars), and (E)  
15  
16 Heart Failure (grey bars).  
17  
18  
19  
20

21 **Figure 2: Flow diagram of the Prospective Review**  
22  
23  
24  
25  
26  
27  
28  
29  
30  
31  
32  
33  
34  
35  
36  
37  
38  
39  
40  
41  
42  
43  
44  
45  
46  
47  
48  
49  
50  
51  
52  
53  
54  
55  
56  
57  
58  
59  
60

1  
2  
3  
4  
5  
6  
7  
8  
9  
10  
11  
12  
13  
14  
15  
16  
17  
18  
19  
20  
21  
22  
23  
24  
25  
26  
27  
28  
29  
30  
31  
32  
33  
34  
35  
36  
37  
38  
39  
40  
41  
42  
43  
44  
45  
46

For peer review only



**Figure 1: aLRTD admissions identified by Retrospective ICD-10 diagnostic code analysis at North Bristol National Health Service Trust— United Kingdom 2018–2019.** Monthly number of patients admitted, based on ICD-10 coding analysis, with (A) all acute Lower Respiratory Tract Disease (aLRTD) (black bars), (B) Pneumonia (slashed bars), (C) Non-pneumonic Lower Respiratory Tract Infection (NP-LRTI) (white bars), (D) Other LRTD (cross-hash bars), and (E) Heart Failure (grey bars).

169x207mm (300 x 300 DPI)



**Figure 2: Flow diagram of the Prospective Review**

149x123mm (300 x 300 DPI)

**Supplementary Data 1: ICD-10 codes used for patient identification for Retrospective Analysis**

| ICD-10 code | Definition                                                            | Pneumonia | NP-LRTI    | HF | Other aLRTD |
|-------------|-----------------------------------------------------------------------|-----------|------------|----|-------------|
| J09         | Influenza due to identified zoonotic or pandemic influenza virus      |           | X          |    |             |
| J10         | Influenza due to identified seasonal influenza virus                  |           | X          |    |             |
| J11         | Influenza, virus not identified                                       |           | X          |    |             |
| J12         | Viral pneumonia, not elsewhere classified                             | X         |            |    |             |
| J13         | Pneumonia due to <i>Streptococcus pneumoniae</i>                      | X         |            |    |             |
| J14         | Pneumonia due to <i>Haemophilus influenzae</i>                        | X         |            |    |             |
| J15         | Bacterial pneumonia, not elsewhere classified                         | X         |            |    |             |
| J16         | Pneumonia due to other infectious organisms, not elsewhere classified | X         |            |    |             |
| J17         | Pneumonia in diseases classified elsewhere                            | X         |            |    |             |
| J18         | Pneumonia, organism unspecified                                       | X         |            |    |             |
| J20         | Acute bronchitis                                                      |           | X          |    |             |
| J21         | Acute bronchiolitis                                                   |           | X          |    |             |
| J22         | Unspecified acute lower respiratory infection                         |           | X          |    |             |
| J40         | Bronchitis, not specified as acute or chronic                         |           | X          |    |             |
| J41         | Simple and mucopurulent chronic bronchitis                            |           | X          |    |             |
| J42         | Unspecified chronic bronchitis                                        |           | X          |    |             |
| J43         | Emphysema                                                             |           |            |    | X           |
| J44         | Other chronic obstructive pulmonary disease (including J44.0 chronic  |           | J44.0 only |    | X (J44.0)   |



|      |                                                                                                                                      |  |   |   |   |
|------|--------------------------------------------------------------------------------------------------------------------------------------|--|---|---|---|
|      | obstructive pulmonary disease with acute lower respiratory infection)                                                                |  |   |   |   |
| J45  | Asthma                                                                                                                               |  |   |   | X |
| J46  | Status asthmaticus                                                                                                                   |  |   |   | X |
| J47  | Bronchiectasis                                                                                                                       |  |   |   | X |
| J85  | Abscess of lung and mediastinum                                                                                                      |  | X |   |   |
| J86  | Pyothorax                                                                                                                            |  | X |   |   |
| J90  | Pleural effusion, not elsewhere classified                                                                                           |  |   |   | X |
| J91  | Pleural effusion in conditions classified elsewhere                                                                                  |  |   |   | X |
| J95  | Postprocedural respiratory disorders, not elsewhere classified                                                                       |  |   |   | X |
| J96  | Respiratory failure, not elsewhere classified                                                                                        |  |   |   | X |
| J98  | Other respiratory disorders                                                                                                          |  |   |   | X |
| J99  | Respiratory disorders in diseases classified elsewhere                                                                               |  |   |   | X |
| I110 | Hypertensive heart disease with heart failure                                                                                        |  |   | X |   |
| I130 | Hypertensive heart and chronic kidney disease with heart failure and stage 1 through stage 4 chronic kidney disease                  |  |   | X |   |
| I132 | Hypertensive heart and chronic kidney disease with heart failure and with stage 5 chronic kidney disease, or end stage renal disease |  |   | X |   |
| I50  | Heart failure                                                                                                                        |  |   | X |   |

## Supplementary Data 2: Case Definitions

| Condition                                                             | Definition                                                                                                                                                                                                                                                                                                                                                                                                                                                                                      | Reference                                                                                                                                                                                                                                                     |
|-----------------------------------------------------------------------|-------------------------------------------------------------------------------------------------------------------------------------------------------------------------------------------------------------------------------------------------------------------------------------------------------------------------------------------------------------------------------------------------------------------------------------------------------------------------------------------------|---------------------------------------------------------------------------------------------------------------------------------------------------------------------------------------------------------------------------------------------------------------|
| Acute Lower Respiratory Tract Disease (aLRTD)                         | <p>Acute lower respiratory tract disease (aLRTD) encompasses pneumonia, non-pneumonic lower respiratory tract infection (LRTI), acute bronchitis, exacerbation of underlying respiratory disease including asthma and chronic obstructive pulmonary disease (COPD), and cardiac failure with respiratory symptoms.</p> <p>Pneumothorax, pulmonary embolism, progression or new diagnosis of primary or secondary lung malignancy were excluded from aLRTD.</p>                                  |                                                                                                                                                                                                                                                               |
| Pneumonia                                                             | <p>Pneumonia was defined as infection affecting the airways (below the level of the larynx), with either:</p> <ol style="list-style-type: none"> <li>(1) an acute illness with radiographic shadowing which was at least segmental or present in more than one lobe and was not known to be previously present or due to other causes</li> <li>(2) in the absence of radiological investigation, clinical confirmation of pneumonic disease in the opinion of the treating physician</li> </ol> | Lim WS, Baudouin SV, George RC, <i>et al</i> ; Pneumonia Guidelines Committee of the BTS Standards of Care Committee. BTS guidelines for the management of community acquired pneumonia in adults: update 2009. <i>Thorax</i> . 2009 Oct;64 Suppl 3:iii 1-55. |
| Non-Radiologically Proven Lower Respiratory Tract Infection (NP-LRTI) | An infection that affects the airways (below the level of the larynx) including the trachea and alveoli, with neither the presence of radiological change nor a clinical diagnosis of pneumonia from the treating physician, i.e. non-pneumonic infection in the lungs.                                                                                                                                                                                                                         | Anderson W, Winter J. Managing LRTI in adults in the community. <i>Practitioner</i> . 2009 Nov;253(1723):21-5, 2-3. PMID: 20043506.                                                                                                                           |
| Cardiac/Heart Failure (HF)                                            | A clinical syndrome with symptoms and/or signs caused by a structural and/or functional cardiac abnormality and corroborated by elevated natriuretic peptide levels and or objective evidence of pulmonary or systemic congestion.                                                                                                                                                                                                                                                              | Bozkurt, Biykem <i>et al</i> . Universal Definition and Classification of Heart Failure. <i>Journal of Cardiac Failure</i> , Volume 27, Issue 4, 387 – 413.                                                                                                   |
| Other aLRTD                                                           | aLRTD which was neither pneumonia, NP-LRTI nor HF was classified as 'Other aLRTD'. This therefore includes non-infective exacerbations of chronic respiratory disease such as asthma, COPD and bronchiectasis                                                                                                                                                                                                                                                                                   |                                                                                                                                                                                                                                                               |

## STROBE Statement—checklist of items that should be included in reports of observational studies

|                              | Item No | Recommendation                                                                                                                                                                                                                                                                                                                                                                                                                                                         | Page No |
|------------------------------|---------|------------------------------------------------------------------------------------------------------------------------------------------------------------------------------------------------------------------------------------------------------------------------------------------------------------------------------------------------------------------------------------------------------------------------------------------------------------------------|---------|
| <b>Title and abstract</b>    | 1       | (a) Indicate the study's design with a commonly used term in the title or the abstract                                                                                                                                                                                                                                                                                                                                                                                 | 3       |
|                              |         | (b) Provide in the abstract an informative and balanced summary of what was done and what was found                                                                                                                                                                                                                                                                                                                                                                    | 3       |
| <b>Introduction</b>          |         |                                                                                                                                                                                                                                                                                                                                                                                                                                                                        |         |
| Background/rationale         | 2       | Explain the scientific background and rationale for the investigation being reported                                                                                                                                                                                                                                                                                                                                                                                   | 5-6     |
| Objectives                   | 3       | State specific objectives, including any prespecified hypotheses                                                                                                                                                                                                                                                                                                                                                                                                       | 6       |
| <b>Methods</b>               |         |                                                                                                                                                                                                                                                                                                                                                                                                                                                                        |         |
| Study design                 | 4       | Present key elements of study design early in the paper                                                                                                                                                                                                                                                                                                                                                                                                                | 7       |
| Setting                      | 5       | Describe the setting, locations, and relevant dates, including periods of recruitment, exposure, follow-up, and data collection                                                                                                                                                                                                                                                                                                                                        | 7-9     |
| Participants                 | 6       | (a) <i>Cohort study</i> —Give the eligibility criteria, and the sources and methods of selection of participants. Describe methods of follow-up<br><i>Case-control study</i> —Give the eligibility criteria, and the sources and methods of case ascertainment and control selection. Give the rationale for the choice of cases and controls<br><i>Cross-sectional study</i> —Give the eligibility criteria, and the sources and methods of selection of participants | 7-9     |
|                              |         | (b) <i>Cohort study</i> —For matched studies, give matching criteria and number of exposed and unexposed<br><i>Case-control study</i> —For matched studies, give matching criteria and the number of controls per case                                                                                                                                                                                                                                                 |         |
| Variables                    | 7       | Clearly define all outcomes, exposures, predictors, potential confounders, and effect modifiers. Give diagnostic criteria, if applicable                                                                                                                                                                                                                                                                                                                               | 8       |
| Data sources/<br>measurement | 8*      | For each variable of interest, give sources of data and details of methods of assessment (measurement). Describe comparability of assessment methods if there is more than one group                                                                                                                                                                                                                                                                                   | 7-8     |
| Bias                         | 9       | Describe any efforts to address potential sources of bias                                                                                                                                                                                                                                                                                                                                                                                                              | 15-16   |
| Study size                   | 10      | Explain how the study size was arrived at                                                                                                                                                                                                                                                                                                                                                                                                                              | 7-8     |
| Quantitative variables       | 11      | Explain how quantitative variables were handled in the analyses. If applicable, describe which groupings were chosen and why                                                                                                                                                                                                                                                                                                                                           | 8-9     |
| Statistical methods          | 12      | (a) Describe all statistical methods, including those used to control for confounding                                                                                                                                                                                                                                                                                                                                                                                  | 9       |
|                              |         | (b) Describe any methods used to examine subgroups and interactions                                                                                                                                                                                                                                                                                                                                                                                                    | NA      |
|                              |         | (c) Explain how missing data were addressed                                                                                                                                                                                                                                                                                                                                                                                                                            | NA      |
|                              |         | (d) <i>Cohort study</i> —If applicable, explain how loss to follow-up was addressed<br><i>Case-control study</i> —If applicable, explain how matching of cases and controls was addressed<br><i>Cross-sectional study</i> —If applicable, describe analytical methods taking account of sampling strategy                                                                                                                                                              | NA      |
|                              |         | (e) Describe any sensitivity analyses                                                                                                                                                                                                                                                                                                                                                                                                                                  | NA      |

Continued on next page

| <b>Results</b>           |     |                                                                                                                                                                                                              |              |
|--------------------------|-----|--------------------------------------------------------------------------------------------------------------------------------------------------------------------------------------------------------------|--------------|
| Participants             | 13* | (a) Report numbers of individuals at each stage of study—eg numbers potentially eligible, examined for eligibility, confirmed eligible, included in the study, completing follow-up, and analysed            | 10, 21-24    |
|                          |     | (b) Give reasons for non-participation at each stage                                                                                                                                                         | NA           |
|                          |     | (c) Consider use of a flow diagram                                                                                                                                                                           | 24           |
| Descriptive data         | 14* | (a) Give characteristics of study participants (eg demographic, clinical, social) and information on exposures and potential confounders                                                                     | 21-24        |
|                          |     | (b) Indicate number of participants with missing data for each variable of interest                                                                                                                          | NA           |
|                          |     | (c) <i>Cohort study</i> —Summarise follow-up time (eg, average and total amount)                                                                                                                             | NA           |
| Outcome data             | 15* | <i>Cohort study</i> —Report numbers of outcome events or summary measures over time                                                                                                                          | 10-11, 21-24 |
|                          |     | <i>Case-control study</i> —Report numbers in each exposure category, or summary measures of exposure                                                                                                         | NA           |
|                          |     | <i>Cross-sectional study</i> —Report numbers of outcome events or summary measures                                                                                                                           | NA           |
| Main results             | 16  | (a) Give unadjusted estimates and, if applicable, confounder-adjusted estimates and their precision (eg, 95% confidence interval). Make clear which confounders were adjusted for and why they were included | 11           |
|                          |     | (b) Report category boundaries when continuous variables were categorized                                                                                                                                    | NA           |
|                          |     | (c) If relevant, consider translating estimates of relative risk into absolute risk for a meaningful time period                                                                                             | NA           |
| Other analyses           | 17  | Report other analyses done—eg analyses of subgroups and interactions, and sensitivity analyses                                                                                                               | 10, 21-25    |
| <b>Discussion</b>        |     |                                                                                                                                                                                                              |              |
| Key results              | 18  | Summarise key results with reference to study objectives                                                                                                                                                     | 12           |
| Limitations              | 19  | Discuss limitations of the study, taking into account sources of potential bias or imprecision. Discuss both direction and magnitude of any potential bias                                                   | 15           |
| Interpretation           | 20  | Give a cautious overall interpretation of results considering objectives, limitations, multiplicity of analyses, results from similar studies, and other relevant evidence                                   | 12-16        |
| Generalisability         | 21  | Discuss the generalisability (external validity) of the study results                                                                                                                                        | 12-16        |
| <b>Other information</b> |     |                                                                                                                                                                                                              |              |
| Funding                  | 22  | Give the source of funding and the role of the funders for the present study and, if applicable, for the original study on which the present article is based                                                | 1            |

\*Give information separately for cases and controls in case-control studies and, if applicable, for exposed and unexposed groups in cohort and cross-sectional studies.

**Note:** An Explanation and Elaboration article discusses each checklist item and gives methodological background and published examples of transparent reporting. The STROBE checklist is best used in conjunction with this article (freely available on the Web sites of PLoS Medicine at <http://www.plosmedicine.org/>, Annals of Internal Medicine at <http://www.annals.org/>, and Epidemiology at <http://www.epidem.com/>). Information on the STROBE Initiative is available at [www.strobe-statement.org](http://www.strobe-statement.org).
