# Supplementary material for: Incidence of acute lower respiratory tract disease hospitalisations, including pneumonia, among adults in Bristol, UK, 2019, estimated using both a prospective and retrospective methodology
Source: PubMed Central journal article supplement (PMC9204403; doi:10.1136/bmjopen-2021-057464), 2022-06-15
Supplement: bmjopen-2021-057464supp001.pdf [file bmjopen-2021-057464supp001.pdf]

### Supplementary Data 1: ICD-10 codes used for patient identification for Retrospective Analysis

| ICD-10 code | Definition                                                            | Pneumonia | NP-LRTI    | HF | Other aLRTD |
|-------------|-----------------------------------------------------------------------|-----------|------------|----|-------------|
| J09         | Influenza due to identified zoonotic or pandemic influenza virus      |           | X          |    |             |
| J10         | Influenza due to identified seasonal influenza virus                  |           | X          |    |             |
| J11         | Influenza, virus not identified                                       |           | X          |    |             |
| J12         | Viral pneumonia, not elsewhere classified                             | X         |            |    |             |
| J13         | Pneumonia due to <i>Streptococcus pneumoniae</i>                      | X         |            |    |             |
| J14         | Pneumonia due to <i>Haemophilus influenzae</i>                        | X         |            |    |             |
| J15         | Bacterial pneumonia, not elsewhere classified                         | X         |            |    |             |
| J16         | Pneumonia due to other infectious organisms, not elsewhere classified | X         |            |    |             |
| J17         | Pneumonia in diseases classified elsewhere                            | X         |            |    |             |
| J18         | Pneumonia, organism unspecified                                       | X         |            |    |             |
| J20         | Acute bronchitis                                                      |           | X          |    |             |
| J21         | Acute bronchiolitis                                                   |           | X          |    |             |
| J22         | Unspecified acute lower respiratory infection                         |           | X          |    |             |
| J40         | Bronchitis, not specified as acute or chronic                         |           | X          |    |             |
| J41         | Simple and mucopurulent chronic bronchitis                            |           | X          |    |             |
| J42         | Unspecified chronic bronchitis                                        |           | X          |    |             |
| J43         | Emphysema                                                             |           |            |    | X           |
| J44         | Other chronic obstructive pulmonary disease (including J44.0 chronic  |           | J44.0 only |    | X (J44.0)   |

|      |                                                                                                                                      |  |   |   |   |
|------|--------------------------------------------------------------------------------------------------------------------------------------|--|---|---|---|
|      | obstructive pulmonary disease with acute lower respiratory infection)                                                                |  |   |   |   |
| J45  | Asthma                                                                                                                               |  |   |   | X |
| J46  | Status asthmaticus                                                                                                                   |  |   |   | X |
| J47  | Bronchiectasis                                                                                                                       |  |   |   | X |
| J85  | Abscess of lung and mediastinum                                                                                                      |  | X |   |   |
| J86  | Pyothorax                                                                                                                            |  | X |   |   |
| J90  | Pleural effusion, not elsewhere classified                                                                                           |  |   |   | X |
| J91  | Pleural effusion in conditions classified elsewhere                                                                                  |  |   |   | X |
| J95  | Postprocedural respiratory disorders, not elsewhere classified                                                                       |  |   |   | X |
| J96  | Respiratory failure, not elsewhere classified                                                                                        |  |   |   | X |
| J98  | Other respiratory disorders                                                                                                          |  |   |   | X |
| J99  | Respiratory disorders in diseases classified elsewhere                                                                               |  |   |   | X |
| I110 | Hypertensive heart disease with heart failure                                                                                        |  |   | X |   |
| I130 | Hypertensive heart and chronic kidney disease with heart failure and stage 1 through stage 4 chronic kidney disease                  |  |   | X |   |
| I132 | Hypertensive heart and chronic kidney disease with heart failure and with stage 5 chronic kidney disease, or end stage renal disease |  |   | X |   |
| I50  | Heart failure                                                                                                                        |  |   | X |   |
